# Supplementary material for: A sustainable one-pot multi-component approach toward the synthesis of symmetric and unsymmetrical spiro heterocycles catalyzed by the Brønsted acidic ionic liquid [CMMIM][BF4]
Source: Royal Society of Chemistry journal article supplement (doi:10.1039/d6ra01721e), 2026-04-28
Supplement: d6ra01721e1.pdf [file d6ra01721e1.pdf]

# **RSC Advances**

## **Supporting Information**

### **A Sustainable One-Pot Multi-Component Approach Toward the Synthesis of Symmetric and Unsymmetric Spiro Heterocycles Catalyzed by the Bronsted Acidic Ionic Liquid [CMMIM][BF<sub>4</sub>]**

Rujuma Begum and Barnali Maiti\*

# A Sustainable One-Pot Multi-Component Approach Toward the Synthesis of Symmetric and Unsymmetric Spiro Heterocycles Catalyzed by the Bronsted Acidic Ionic Liquid [CMMIM][BF<sub>4</sub>]

Rujuma Begum and Barnali Maiti\*

Department of Chemistry, School of Advanced Sciences, Vellore Institute of Technology,  
Vellore- 632014, India.

\*Corresponding author

E-mail: [barnali.m@gmail.com](mailto:barnali.m@gmail.com); [barnali.m@vit.ac.in](mailto:barnali.m@vit.ac.in)

## Table of Contents

| S. No | Caption                                                                                                                                                                                              | No.                 | Page No. |
|-------|------------------------------------------------------------------------------------------------------------------------------------------------------------------------------------------------------|---------------------|----------|
| 1.    | Experimental Section                                                                                                                                                                                 |                     | 4-5      |
| 2.    | Spectral characterization data                                                                                                                                                                       | <b>Table S1</b>     | 6-19     |
| 3.    | <sup>1</sup> H NMR (400MHz), <sup>13</sup> C NMR (100MHz) spectra of 4 in D <sub>2</sub> O                                                                                                           | <b>Fig. S1-S2</b>   | 20       |
| 4.    | <sup>19</sup> F NMR (400 MHz), spectrum of 4 in D <sub>2</sub> O                                                                                                                                     | <b>Fig. S3</b>      | 21       |
| 5.    | <sup>11</sup> B NMR (128MHz), spectrum of 4 in D <sub>2</sub> O and FT-IR spectrum of 4                                                                                                              | <b>Fig. S4-S5</b>   | 22       |
| 6.    | HRMS (-ve) spectrum of recycled ionic liquid                                                                                                                                                         | <b>Fig. S6</b>      | 23       |
| 7.    | <sup>1</sup> H NMR (400MHz), <sup>13</sup> C NMR (100MHz) and DEPT-135 (100MHz) in DMSO-d <sub>6</sub> and FT-IR spectra of the synthesized Symmetric and Unsymmetric Spiro Heterocyclic Derivatives | <b>Fig. S7-S68</b>  | 24-63    |
| 8.    | <sup>1</sup> H NMR (400MHz), <sup>13</sup> C NMR (100MHz) spectra of intermediate C                                                                                                                  | <b>Fig. S69-S70</b> | 64       |

|     |                                                                                                                                                |                     |       |
|-----|------------------------------------------------------------------------------------------------------------------------------------------------|---------------------|-------|
|     | for the synthesis of unsymmetrical spiro heterocycles in DMSO-d <sub>6</sub>                                                                   |                     |       |
| 9.  | DEPT-135 (100MHz), FT-IR spectrum of intermediate C for the synthesis of unsymmetrical spiro heterocycles                                      | <b>Fig. S71-S72</b> | 65    |
| 10. | HRMS spectrum of intermediate C for the synthesis of unsymmetrical spiro heterocycles                                                          | <b>Fig. S73</b>     | 66    |
| 11. | UV-Visible spectra of 10 <sup>-5</sup> M concentration of 4-nitroaniline in acetonitrile solution.                                             | <b>Fig. S74.</b>    | 67    |
| 12. | UV-Visible spectra of 4 nitroaniline in different concentration of [CMMIM] [BF <sub>4</sub> ] ionic liquid (10 <sup>-5</sup> M 4-nitroaniline) | <b>Fig. S75</b>     | 68    |
| 13. | Single crystal data and structure refinement for 8c                                                                                            | <b>Table S2</b>     | 69-74 |
| 14. | Single crystal data and structure refinement for 9a                                                                                            | <b>Table S3</b>     | 75-83 |
| 15. | Single crystal data and structure refinement for 9i                                                                                            | <b>Table S4</b>     | 83-90 |
| 16. | Summarized Green Chemistry Metrics for 8a and 9a                                                                                               |                     | 91-93 |

## EXPERIMENTAL SECTION

### Materials and Methods

Isatin, isatin derivatives, acenaphthenequinone, ethyl cyanoacetate, 3-methyl-1-phenyl-5-pyrazolone, diketones, 1-methyl imidazole, and 2-chloro acetic acid were purchased from Sigma-Aldrich, and all organic solvents were acquired from commercial suppliers and were utilized without any additional purification. Analytical thin-layer chromatography (TLC) was performed on 0.25-mm silica gel-coated Kieselgel 60 F254 plates.  $^1\text{H}$  NMR (400 MHz),  $^{13}\text{C}$  NMR (100 MHz), and DEPT-135 NMR (100 MHz) spectra were obtained through a Bruker AVANCE III 400 MHz spectrometer. Chemical shifts and coupling constants are explained in parts per million (ppm) and Hertz (Hz), respectively, using tetramethyl silane (TMS) as an internal standard and the solvent resonance at (DMSO- $d_6$ :  $^1\text{H}$  NMR 400 MHz and  $^{13}\text{C}$  NMR 100 MHz):  $\delta$  2.5 and 39.5 ppm; ( $\text{D}_2\text{O}$ :  $^1\text{H}$  NMR 400 MHz): 4.65 ppm. The peak multiplicities are written as s (singlet), d (doublet), dd (doublet of doublet), m (multiplet), and t (triplet). The FT-IR spectra were collected employing the Perkin-Elmer RX-I FTIR spectrometer in ATR mode.

### General Procedure for the Synthesis of 1-carboxymethyl 3-methyl imidazolium tetrafluoroborate **4**.

In a 250 mL round-bottom flask, 2.0 g (1.0 equiv, 2.43 mmol) of 1-methylimidazole **1** was incorporated with 2.5 g (1.1 equiv, 2.68 mmol) of chloroacetic acid **2**. The mixture was stirred for 2 hours at 80 °C. Then, the reaction mixture was left to cool, and the pale-yellow viscous liquid was washed several times with ether and then dried under vacuum. The resulting [BMMIM][Cl] ionic-liquid **3** was mixed with  $\text{NaBF}_4$  (2.94 g, 1.1 equiv, 2.68 mmol), diluted in 20 mL of dry acetonitrile, and stirred for 36 h at room temperature. The resultant white precipitate ( $\text{NaCl}$ ) was filtered and washed frequently with acetonitrile (3 X 30 mL). The concentration of the cumulative filtrates yields 1-carboxymethyl-3-methyl imidazolium tetrafluoroborate [CMMIM][ $\text{BF}_4$ ] **4** as a pale-yellow liquid in 97% yield. The product was characterized by  $^1\text{H}$  NMR,  $^{13}\text{C}$  NMR, DEPT-135, and FT-IR spectra and was discovered to be the same as those mentioned in the literature.

### General Procedure for the Synthesis of 3',3',6',6'-tetramethyl-3',4',6',7'-tetrahydrospiro[indoline-3,9'-xanthene]-1',2,8'(2'H,5'H)-trione **8a**.

To a dry 25-mL round-bottom flask, isatin **5a** (1 equiv), and dimedone **6a** (2 equiv) and 6 mol% of [CMMIM][BF<sub>4</sub>] ionic liquid **4** were successively added to 6 mL of ethanol: water (1:1 v/v 6 mL) and refluxed at 80 °C for 3 h. The progress of the reaction was monitored using TLC. After the completion of the reaction, the resulting solid precipitate was filtered out and then washed with 30% of ethyl acetate (10 mL X 3) and ether without any column chromatography to achieve the desired product **8a** with 95% yield. The given products were analyzed using <sup>1</sup>H NMR, <sup>13</sup>C NMR, and FT-IR spectra and were found to resemble those published previously in the literature.

**General Procedure for the Synthesis of ethyl 2-amino-7,7-dimethyl-2',5-dioxo-5,6,7,8-tetrahydrospiro[chromene-4,3'-indoline]-3-carboxylate 9a.**

To a dry 25 mL round-bottom flask, isatin **5a** (1 equiv), dimedone **6a** (1 equiv), ethyl cyanoacetate **7** (1 equiv) and 5 mol% of [CMMIM][BF<sub>4</sub>] ionic liquid **4** were successively added to 6 mL of ethanol: water (1:1 v/v 6mL) and refluxed at 80 °C for 3 h. The progress of the reaction was monitored using TLC. After the completion of the reaction, the resulting solid precipitate was filtered out and then washed with 30% of ethyl acetate (10 mL X 3) and ether without column chromatography to achieve the desired product **9a** with 97% yield. The given products were analyzed using <sup>1</sup>H NMR, <sup>13</sup>C NMR, and FT-IR spectra and were found to resemble those published previously in the literature.

Table S1. Spectral characterization data

| S. No | Name of Compounds                                                                                              | Structures                                                                          | Characterization                                                                                                                                                                                                                                                                                                                                                                                                                                                                                                                                                                                                                                            |
|-------|----------------------------------------------------------------------------------------------------------------|-------------------------------------------------------------------------------------|-------------------------------------------------------------------------------------------------------------------------------------------------------------------------------------------------------------------------------------------------------------------------------------------------------------------------------------------------------------------------------------------------------------------------------------------------------------------------------------------------------------------------------------------------------------------------------------------------------------------------------------------------------------|
| 1.    | <b>1-carboxymethyl 3-methyl imidazolium tetrafluoroborate [CMMIM][BF<sub>4</sub>] 4</b>                        | 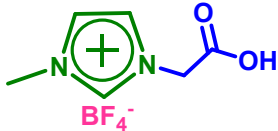   | <p>Pale yellow liquid, 97% yield</p> <p><b>FT-IR (ATR mode, cm<sup>-1</sup>):</b> 3330, 1760, 1030, 759, 625, 523.</p> <p><b><sup>1</sup>H NMR (400 MHz, D<sub>2</sub>O, ppm) δ</b> 8.66 (s, 1H), 7.42 (s, 1H), 7.41 (s, 1H), 5.03 (s, 2H), 3.86 (s, 3H).</p> <p><b><sup>13</sup>C NMR (100 MHz, D<sub>2</sub>O, ppm) δ</b> 172.41, 139.83, 125.96, 52.28, 38.34.</p> <p><b><sup>19</sup>F NMR (400 MHz, D<sub>2</sub>O, ppm) δ</b> -150.36, -150.41.</p> <p><b><sup>11</sup>B NMR (128MHz, D<sub>2</sub>O, ppm) δ</b> -1.43.</p>                                                                                                                           |
| 2.    | <b>3',3',6',6'-tetramethyl-3',4',6',7'-tetrahydrospiro[indoline-3,9'-xanthene]-1',2,8'(2'H,5'H)-trione 8a.</b> |  | <p>White Solid, 95% yield, Mp (°C): &gt;300</p> <p><b>FT-IR (ATR mode, cm<sup>-1</sup>):</b> 3363, 2966, 1712, 1666, 1616, 1469, 1307, 1170, 1126, 1018, 748, 524.</p> <p><b><sup>1</sup>H NMR (400 MHz, DMSO-d<sub>6</sub>, ppm) δ</b> 10.28 (s, 1H), 7.06 (t, <i>J</i> = 7.5 Hz, 1H), 6.84 (d, <i>J</i> = 7.0 Hz, 1H), 6.77 (t, <i>J</i> = 7.4 Hz, 1H), 6.71 (d, <i>J</i> = 7.6 Hz, 1H), 2.64 (d, <i>J</i> = 17.6 Hz, 2H), 2.57 – 2.48 (m, 2H), 2.19 (d, <i>J</i> = 15.9 Hz, 2H), 2.03 (d, <i>J</i> = 15.9 Hz, 2H), 1.03 (s, 6H), 0.95 (s, 6H).</p> <p><b><sup>13</sup>C NMR (100 MHz, DMSO-d<sub>6</sub>, ppm) δ</b> 195.45, 178.69, 163.92, 144.30,</p> |

|    |                                                                                                                                |                                                                                     |                                                                                                                                                                                                                                                                                                                                                                                                                                                                                                                                                                                                                                                                                                                                                         |
|----|--------------------------------------------------------------------------------------------------------------------------------|-------------------------------------------------------------------------------------|---------------------------------------------------------------------------------------------------------------------------------------------------------------------------------------------------------------------------------------------------------------------------------------------------------------------------------------------------------------------------------------------------------------------------------------------------------------------------------------------------------------------------------------------------------------------------------------------------------------------------------------------------------------------------------------------------------------------------------------------------------|
|    |                                                                                                                                |                                                                                     | <p>134.51, 128.19, 122.67, 121.13, 113.46, 108.93, 51.00, 45.67, 32.12, 28.40, 27.06.</p> <p><b>DEPT-135 (100 MHz, DMSO-d<sub>6</sub>, ppm)</b> δ 128.19, 122.67, 121.13, 108.93, 51.00, 40.59, 28.40, 27.06.</p>                                                                                                                                                                                                                                                                                                                                                                                                                                                                                                                                       |
| 3. | <p><b>5-fluoro-3',3',6',6'-tetramethyl-3',4',6',7'-tetrahydrospiro[indoline-3,9'-xanthene]-1',2,8'(2'H,5'H)-trione 8b.</b></p> | 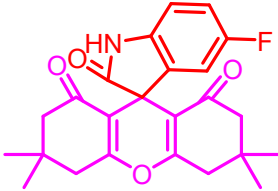   | <p>White Solid, 92% yield; Mp (°C):289-291</p> <p><b>FT-IR (ATR mode, cm<sup>-1</sup>):</b> 3370, 2972, 1728, 1666, 1620, 1485, 1340, 1172, 1114, 1033, 817, 582.</p> <p><b><sup>1</sup>H NMR (400 MHz, DMSO-d<sub>6</sub>, ppm)</b> δ 10.34 (s, 1H), 6.88 (t, <i>J</i> = 8.9 Hz, 1H), 6.78 (d, <i>J</i> = 6.4 Hz, 1H), 6.68 (dd, <i>J</i> = 8.1, 4.2 Hz, 1H), 2.62 (d, <i>J</i> = 17.6 Hz, 2H), 2.54 (d, <i>J</i> = 18.1 Hz, 2H), 2.19 (d, <i>J</i> = 15.9 Hz, 2H), 2.07 (d, <i>J</i> = 15.9 Hz, 2H), 1.02 (s, 6H), 0.97 (s, 6H).</p> <p><b><sup>13</sup>C NMR (100 MHz, DMSO-d<sub>6</sub>, ppm)</b> δ 195.11, 178.16, 163.74, 156.51, 140.22, 135.61, 135.54, 113.80, 113.57, 112.48, 110.27, 110.03, 108.77, 50.46, 45.69, 31.62, 27.70, 26.86.</p> |
| 4. | <p><b>3',4',6',7'-tetrahydrospiro[indoline-3,9'-xanthene]-1',2,8'(2'H,5'H)-trione 8c.</b></p>                                  |  | <p>Pale Yellow Solid, 90% yield; Mp (°C): &gt;300</p> <p><b>FT-IR (ATR mode, cm<sup>-1</sup>):</b> 3360, 2951, 1732, 1674, 1620, 1477, 1303, 1207, 1130, 983, 748, 621, 532.</p>                                                                                                                                                                                                                                                                                                                                                                                                                                                                                                                                                                        |

|    |                                                                                                        |                                                                                    |                                                                                                                                                                                                                                                                                                                                                                                                                                                                                                                                                                                                                                                                                                                                                       |
|----|--------------------------------------------------------------------------------------------------------|------------------------------------------------------------------------------------|-------------------------------------------------------------------------------------------------------------------------------------------------------------------------------------------------------------------------------------------------------------------------------------------------------------------------------------------------------------------------------------------------------------------------------------------------------------------------------------------------------------------------------------------------------------------------------------------------------------------------------------------------------------------------------------------------------------------------------------------------------|
|    |                                                                                                        |                                                                                    | <p><b><sup>1</sup>H NMR (400 MHz, DMSO-d<sub>6</sub>, ppm)</b><br/> <math>\delta</math> 10.28 (s, 1H), 7.05 (t, <math>J = 7.5</math> Hz, 1H), 6.86 (d, <math>J = 7.0</math> Hz, 1H), 6.76 (t, <math>J = 7.3</math> Hz, 1H), 6.69 (d, <math>J = 7.4</math> Hz, 1H), 2.66 (d, <math>J = 5.4</math> Hz, 4H), 2.27 – 2.09 (m, 4H), 1.88 (d, <math>J = 5.5</math> Hz, 4H).</p> <p><b><sup>13</sup>C NMR (100 MHz, DMSO-d<sub>6</sub>, ppm)</b><br/> <math>\delta</math> 195.26, 178.50, 165.19, 143.82, 134.34, 127.70, 122.71, 120.73, 114.15, 108.32, 45.41, 37.05, 26.95, 19.77.</p>                                                                                                                                                                    |
| 5. | <p><b>5-chloro-3',4',6',7'-tetrahydrospiro[indoline-3,9'-xanthene]-1',2,8'(2'H,5'H)-trione 8d.</b></p> | 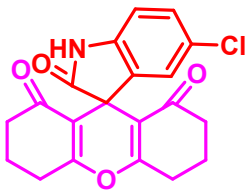 | <p>Pale Yellow Solid, 88% yield; Mp (°C): &gt;300</p> <p><b>FT-IR (ATR mode, cm<sup>-1</sup>):</b> 3359, 2958, 1724, 1670, 1620, 1481, 1303, 1219, 1126, 979, 837, 736, 628, 540.</p> <p><b><sup>1</sup>H NMR (400 MHz, DMSO-d<sub>6</sub>, ppm)</b><br/> <math>\delta</math> 10.44 (s, 1H), 7.10 (dd, <math>J = 8.2, 2.2</math> Hz, 1H), 6.97 (d, <math>J = 2.1</math> Hz, 1H), 6.70 (d, <math>J = 8.2</math> Hz, 1H), 2.67 (t, <math>J = 6.1</math> Hz, 4H), 2.22 (dd, <math>J = 11.0, 6.2</math> Hz, 4H), 1.92 – 1.87 (m, 4H).</p> <p><b><sup>13</sup>C NMR (100 MHz, DMSO-d<sub>6</sub>, ppm)</b><br/> <math>\delta</math> 19.78, 27.08, 29.13, 37.07, 45.79, 109.73, 113.64, 123.01, 124.78, 127.66, 136.40, 142.99, 165.87, 178.48, 195.68.</p> |
| 6. | <p><b>5-bromo-3',4',6',7'-tetrahydrospiro[indoline-3,9'-xanthene]-1',2,8'(2'H,5'H)-</b></p>            |                                                                                    | <p>Pale Yellow Solid, 89% yield; Mp (°C): &gt;300</p>                                                                                                                                                                                                                                                                                                                                                                                                                                                                                                                                                                                                                                                                                                 |

|    |                                                                                                        |                                                                                     |                                                                                                                                                                                                                                                                                                                                                                                                                                                                                                                                                                                                                                                                                                                                            |
|----|--------------------------------------------------------------------------------------------------------|-------------------------------------------------------------------------------------|--------------------------------------------------------------------------------------------------------------------------------------------------------------------------------------------------------------------------------------------------------------------------------------------------------------------------------------------------------------------------------------------------------------------------------------------------------------------------------------------------------------------------------------------------------------------------------------------------------------------------------------------------------------------------------------------------------------------------------------------|
|    | <p>trione 8e.</p>                                                                                      | 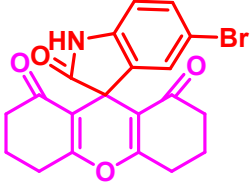   | <p><b>FT-IR (ATR mode, cm<sup>-1</sup>):</b> 3356, 2958, 1735, 1658, 1608, 1469, 1350, 1303, 1207, 1134, 987, 833, 617, 540.</p> <p><b><sup>1</sup>H NMR (400 MHz, DMSO-d<sub>6</sub>, ppm)</b><br/> <math>\delta</math> 10.45 (s, 1H), 7.23 (dd, <math>J = 8.2, 2.0</math> Hz, 1H), 7.08 (d, <math>J = 1.8</math> Hz, 1H), 6.66 (d, <math>J = 8.2</math> Hz, 1H), 2.67 (t, <math>J = 6.1</math> Hz, 4H), 2.26 – 2.18 (m, 4H), 1.91 (dd, <math>J = 12.5, 6.2</math> Hz, 4H).</p> <p><b><sup>13</sup>C NMR (100 MHz, DMSO-d<sub>6</sub>, ppm)</b><br/> <math>\delta</math> 19.79, 27.09, 29.14, 37.08, 45.76, 110.36, 112.53, 113.65, 125.64, 130.55, 136.81, 143.41, 165.92, 178.40, 195.73.</p>                                           |
| 7. | <p><b>5-fluoro-3',4',6',7'-tetrahydrospiro[indoline-3,9'-xanthene]-1',2,8'(2'H,5'H)-trione 8f.</b></p> |  | <p>White Solid, 93% yield; Mp (°C): &gt;300</p> <p><b>FT-IR (ATR mode, cm<sup>-1</sup>):</b> 3359, 2958, 1724, 1689, 1666, 1485, 1300, 1219, 1130, 979, 794, 601, 532.</p> <p><b><sup>1</sup>H NMR (400 MHz, DMSO-d<sub>6</sub>, ppm)</b><br/> <math>\delta</math> 10.39 (s, 1H), 6.93 (t, <math>J = 9.1</math> Hz, 1H), 6.87 (d, <math>J = 8.1</math> Hz, 1H), 6.73 (dd, <math>J = 8.3, 4.3</math> Hz, 1H), 2.72 (t, <math>J = 5.9</math> Hz, 4H), 2.34 – 2.20 (m, 4H), 2.01 – 1.88 (m, 4H).</p> <p><b><sup>13</sup>C NMR (100 MHz, DMSO-d<sub>6</sub>, ppm)</b><br/> <math>\delta</math> 195.48, 178.59, 165.61, 158.99, 156.65, 140.24, 135.94, 113.84, 113.69, 113.61, 110.92, 110.68, 108.74, 108.66, 45.98, 37.05, 27.04, 19.75.</p> |

|    |                                                                                                                           |                                                                                     |                                                                                                                                                                                                                                                                                                                                                                                                                                                                                                                                                                                                                                                                                                                                                     |
|----|---------------------------------------------------------------------------------------------------------------------------|-------------------------------------------------------------------------------------|-----------------------------------------------------------------------------------------------------------------------------------------------------------------------------------------------------------------------------------------------------------------------------------------------------------------------------------------------------------------------------------------------------------------------------------------------------------------------------------------------------------------------------------------------------------------------------------------------------------------------------------------------------------------------------------------------------------------------------------------------------|
| 8. | <p><b>3',5'-dimethyl-1',7'-diphenyl-1'H,2H,7'H-spiro[acenaphthylene-1,4'-pyrano[2,3-c:6,5-c']dipyrazol]-2-one 8g.</b></p> | 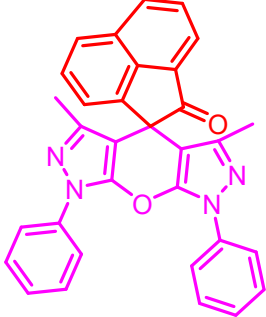   | <p>Yellow solid, 95% yield; Mp (°C): 202-204</p> <p><b>FT-IR (ATR mode, cm<sup>-1</sup>):</b> 3050, 2796, 1728, 1624, 1566, 1492, 1396, 1361, 1303, 1215, 1118, 995, 783, 732, 690, 582, 543.</p> <p><b><sup>1</sup>H NMR (400 MHz, DMSO-d<sub>6</sub>, ppm)</b><br/>       δ 8.29 (d, <i>J</i> = 8.0 Hz, 1H), 8.12 – 7.93 (m, 2H), 7.88 (dt, <i>J</i> = 14.9, 7.5 Hz, 1H), 7.78 – 7.46 (m, 6H), 7.51 – 7.25 (m, 4H), 7.19 (dd, <i>J</i> = 24.0, 17.1 Hz, 2H), 2.00 (d, <i>J</i> = 25.9 Hz, 6H).</p> <p><b><sup>13</sup>C NMR (100 MHz, DMSO-d<sub>6</sub>, ppm)</b><br/>       δ 13.34, 53.31, 118.30, 119.21, 121.48, 122.14, 123.83, 124.84, 128.14, 128.68, 128.90, 129.12, 130.39, 131.39, 133.19, 137.44, 140.26, 141.94, 147.85, 203.07.</p> |
| 9. | <p><b>Ethyl 2-amino-7,7-dimethyl-2',5-dioxo-5,6,7,8-tetrahydrospiro[chromene-4,3'-indoline]-3-carboxylate 9a.</b></p>     |  | <p>Ivory Solid, 95% yield; Mp (°C): 255-257</p> <p><b>FT-IR (ATR mode, cm<sup>-1</sup>):</b> 3375, 3186, 1696, 1681, 1639, 1527, 1469, 1342, 1292, 1222, 1138, 1029, 748, 675, 601.</p> <p><b><sup>1</sup>H NMR (400 MHz, DMSO-d<sub>6</sub>, ppm)</b><br/>       δ 10.15 (s, 1H), 7.86 (s, 2H), 7.04 (t, <i>J</i> = 7.5 Hz, 1H), 6.84 (d, <i>J</i> = 7.1 Hz, 1H), 6.76 (t, <i>J</i> = 7.4 Hz, 1H), 6.68 (d, <i>J</i> = 7.6 Hz, 1H), 3.70 (td, <i>J</i> = 6.9, 4.2 Hz, 2H), 2.59 (d, <i>J</i> = 17.5 Hz, 1H), 2.49 (d, <i>J</i> =</p>                                                                                                                                                                                                               |

|     |                                                                                                                                               |                                                                                     |                                                                                                                                                                                                                                                                                                                                                                                                                                                                                                                                                                                                                                                                                                                                                                                                                                                                                                                               |
|-----|-----------------------------------------------------------------------------------------------------------------------------------------------|-------------------------------------------------------------------------------------|-------------------------------------------------------------------------------------------------------------------------------------------------------------------------------------------------------------------------------------------------------------------------------------------------------------------------------------------------------------------------------------------------------------------------------------------------------------------------------------------------------------------------------------------------------------------------------------------------------------------------------------------------------------------------------------------------------------------------------------------------------------------------------------------------------------------------------------------------------------------------------------------------------------------------------|
|     |                                                                                                                                               |                                                                                     | <p>17.1 Hz, 1H), 2.16 (d, <math>J = 15.8</math> Hz, 1H), 2.02 (d, <math>J = 15.8</math> Hz, 1H), 1.02 (s, 3H), 0.95 (s, 3H), 0.80 (t, <math>J = 7.1</math> Hz, 3H).</p> <p><b><math>^{13}\text{C}</math> NMR (100 MHz, DMSO-<math>d_6</math>, ppm)</b></p> <p><math>\delta</math> 194.64, 179.77, 167.63, 162.39, 159.09, 144.03, 135.97, 127.15, 122.21, 120.51, 113.08, 108.10, 76.30, 58.82, 50.63, 46.59, 31.53, 27.77, 26.66, 13.08.</p> <p><b>DEPT-135 (100 MHz, DMSO-<math>d_6</math>, ppm)</b> <math>\delta</math> 127.15, 122.21, 120.51, 108.09, 58.81, 50.62, 40.10, 27.77, 26.65, 13.08.</p>                                                                                                                                                                                                                                                                                                                      |
| 10. | <p><b>Ethyl 2-amino-5'-chloro-7,7-dimethyl-2',5-dioxo-5,6,7,8-tetrahydrospiro[chromene-4,3'-indoline]-3-carboxylate</b></p> <p><b>9b.</b></p> | 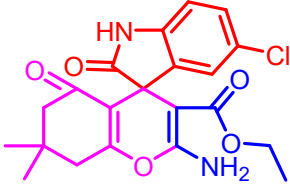 | <p>Ivory Solid, 97% yield; Mp (<math>^{\circ}\text{C}</math>): 250-251</p> <p><b>FT-IR (ATR mode, <math>\text{cm}^{-1}</math>):</b> 3387, 3285, 1724, 1678, 1651, 1516, 1481, 1300, 1222, 1168, 1041, 636, 551.</p> <p><b><math>^1\text{H}</math> NMR (400 MHz, DMSO-<math>d_6</math>, ppm)</b></p> <p><math>\delta</math> 10.31 (s, 1H), 7.94 (s, 2H), 7.10 (dd, <math>J = 8.2, 2.0</math> Hz, 1H), 6.91 (d, <math>J = 1.8</math> Hz, 1H), 6.68 (d, <math>J = 8.2</math> Hz, 1H), 3.76 – 3.71 (m, 2H), 2.53 (d, <math>J = 14.2</math> Hz, 2H), 2.11 (q, <math>J = 15.8</math> Hz, 2H), 1.01 (s, 3H), 0.97 (s, 3H), 0.83 (t, <math>J = 7.1</math> Hz, 3H).</p> <p><b><math>^{13}\text{C}</math> NMR (100 MHz, DMSO-<math>d_6</math>, ppm)</b></p> <p><math>\delta</math> 194.84, 179.52, 167.43, 162.88, 159.18, 143.13, 138.12, 126.98, 124.38, 122.37, 112.47, 109.36, 75.66, 58.95, 50.56, 46.89, 27.42, 27.08, 13.12.</p> |

|     |                                                                                                                                 |                                                                                     |                                                                                                                                                                                                                                                                                                                                                                                                                                                                                                                                                                                                                                                                                                                                                                                                                                                                   |
|-----|---------------------------------------------------------------------------------------------------------------------------------|-------------------------------------------------------------------------------------|-------------------------------------------------------------------------------------------------------------------------------------------------------------------------------------------------------------------------------------------------------------------------------------------------------------------------------------------------------------------------------------------------------------------------------------------------------------------------------------------------------------------------------------------------------------------------------------------------------------------------------------------------------------------------------------------------------------------------------------------------------------------------------------------------------------------------------------------------------------------|
| 11. | <p><b>Ethyl 2-amino-5'-bromo-7,7-dimethyl-2',5-dioxo-5,6,7,8-tetrahydrospiro[chromene-4,3'-indoline]-3-carboxylate 9c.</b></p>  | 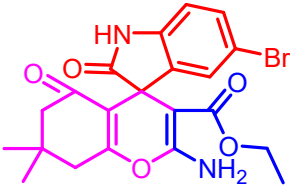   | <p>White Solid, 95% yield; Mp (°C): 295-298</p> <p><b>FT-IR (ATR mode, cm<sup>-1</sup>):</b> 3390, 3282, 1720, 1685, 1616, 1516, 1477, 1350, 1296, 1211, 1165, 1053, 1018, 821, 632, 536.</p> <p><b><sup>1</sup>H NMR (400 MHz, DMSO-d<sub>6</sub>, ppm)</b><br/> <math>\delta</math> 10.32 (s, 1H), 7.94 (s, 2H), 7.23 (dd, <math>J</math> = 8.2, 1.9 Hz, 1H), 7.01 (d, <math>J</math> = 1.6 Hz, 1H), 6.66 (t, <math>J</math> = 11.2 Hz, 1H), 3.82 – 3.66 (m, 2H), 2.51 (s, 2H), 2.11 (q, <math>J</math> = 15.8 Hz, 2H), 0.99 (d, <math>J</math> = 15.5 Hz, 6H), 0.83 (t, <math>J</math> = 7.1 Hz, 3H).</p> <p><b><sup>13</sup>C NMR (100 MHz, DMSO-d<sub>6</sub>, ppm)</b><br/> <math>\delta</math> 194.86, 179.39, 167.42, 162.90, 159.18, 143.53, 138.50, 129.84, 125.05, 112.48, 112.04, 109.99, 75.66, 58.97, 50.55, 46.84, 31.56, 27.40, 27.09, 13.12.</p> |
| 12. | <p><b>Ethyl 2-amino-5'-fluoro-7,7-dimethyl-2',5-dioxo-5,6,7,8-tetrahydrospiro[chromene-4,3'-indoline]-3-carboxylate 9d.</b></p> |  | <p>White Solid, 97% yield; Mp (°C): 291-292</p> <p><b>FT-IR (ATR mode, cm<sup>-1</sup>):</b> 3383, 3275, 1724, 1689, 1647, 1481, 1354, 1296, 1165, 1053, 802, 536.</p> <p><b><sup>1</sup>H NMR (400 MHz, DMSO-d<sub>6</sub>, ppm)</b><br/> <math>\delta</math> 10.18 (s, 1H), 7.91 (s, 2H), 6.90 – 6.83 (m, 1H), 6.77 (dd, <math>J</math> = 8.1, 2.5 Hz, 1H), 6.64 (dd, <math>J</math> = 8.3, 4.3 Hz, 1H), 3.82 – 3.65 (m, 2H), 2.54 (dd, <math>J</math> = 21.1, 11.6</p>                                                                                                                                                                                                                                                                                                                                                                                         |

|     |                                                                                                          |                                                                                   |                                                                                                                                                                                                                                                                                                                                                                                                                                                                                                                                                                                                                                                                                                                                                                                                                                                                                                                              |
|-----|----------------------------------------------------------------------------------------------------------|-----------------------------------------------------------------------------------|------------------------------------------------------------------------------------------------------------------------------------------------------------------------------------------------------------------------------------------------------------------------------------------------------------------------------------------------------------------------------------------------------------------------------------------------------------------------------------------------------------------------------------------------------------------------------------------------------------------------------------------------------------------------------------------------------------------------------------------------------------------------------------------------------------------------------------------------------------------------------------------------------------------------------|
|     |                                                                                                          |                                                                                   | <p>Hz, 2H), 2.19 – 2.01 (m, 2H), 1.02 (s, 3H), 0.97 (s, 3H), 0.81 (t, <math>J = 7.1</math> Hz, 3H).</p> <p><b><math>^{13}\text{C}</math> NMR (100 MHz, DMSO-<math>d_6</math>, ppm)</b><br/> <math>\delta</math> 194.74, 179.75, 167.51, 162.73, 159.15, 140.41, 113.18, 112.95, 112.57, 110.26, 110.02, 108.33, 75.79, 58.89, 50.60, 47.15, 31.53, 27.58, 26.93, 13.12.</p>                                                                                                                                                                                                                                                                                                                                                                                                                                                                                                                                                  |
| 13. | <p><b>Ethyl 2-amino-2',5-dioxo-5,6,7,8-tetrahydrospiro[chromene-4,3'-indoline]-3-carboxylate 9e.</b></p> | 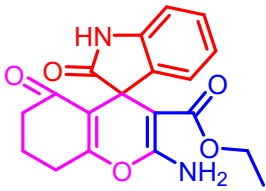 | <p>White Solid, 93% yield; Mp (<math>^{\circ}\text{C}</math>): 252-254</p> <p><b>FT-IR (ATR mode, <math>\text{cm}^{-1}</math>):</b> 3363, 3248, 1685, 1651, 1612, 1516, 1469, 1292, 1226, 1076, 1029, 929, 740, 621, 605, 500.</p> <p><b><math>^1\text{H}</math> NMR (400 MHz, DMSO-<math>d_6</math>, ppm)</b><br/> <math>\delta</math> 10.21 (s, 1H), 7.92 (s, 2H), 7.10 (t, <math>J = 7.5</math> Hz, 1H), 6.91 (d, <math>J = 7.1</math> Hz, 1H), 6.82 (t, <math>J = 7.4</math> Hz, 1H), 6.73 (d, <math>J = 7.6</math> Hz, 1H), 3.87 – 3.68 (m, 2H), 2.70 (t, <math>J = 5.8</math> Hz, 2H), 2.36 – 2.15 (m, 2H), 2.08 – 1.78 (m, 2H), 0.94 – 0.76 (m, 3H).</p> <p><b><math>^{13}\text{C}</math> NMR (100 MHz, DMSO-<math>d_6</math>, ppm)</b><br/> <math>\delta</math> 194.81, 179.88, 167.66, 164.20, 158.98, 144.02, 136.10, 127.12, 122.43, 120.51, 114.22, 108.02, 76.36, 58.82, 46.71, 37.09, 26.93, 19.65, 13.09.</p> |
| 14. | <p><b>Ethyl 2-amino-5'-chloro-2',5-dioxo-5,6,7,8-tetrahydrospiro[chromene-</b></p>                       |                                                                                   | <p>White Solid, 95% yield; Mp (<math>^{\circ}\text{C}</math>): 280-282</p>                                                                                                                                                                                                                                                                                                                                                                                                                                                                                                                                                                                                                                                                                                                                                                                                                                                   |

|     |                                                                                                                   |                                                                                     |                                                                                                                                                                                                                                                                                                                                                                                                                                                                                                                                                                                                                                                                                                                                                                            |
|-----|-------------------------------------------------------------------------------------------------------------------|-------------------------------------------------------------------------------------|----------------------------------------------------------------------------------------------------------------------------------------------------------------------------------------------------------------------------------------------------------------------------------------------------------------------------------------------------------------------------------------------------------------------------------------------------------------------------------------------------------------------------------------------------------------------------------------------------------------------------------------------------------------------------------------------------------------------------------------------------------------------------|
|     | <p><b>4,3'-indoline]-3-carboxylate 9f.</b></p>                                                                    | 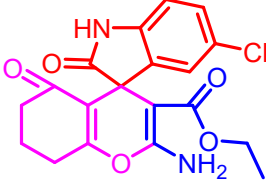   | <p><b>FT-IR (ATR mode, cm<sup>-1</sup>):</b> 3348, 3178, 1700, 1651, 1527, 1477, 1300, 1219, 1141, 1033, 806, 586, 532.</p> <p><b><sup>1</sup>H NMR (400 MHz, DMSO-d<sub>6</sub>, ppm)</b><br/> <math>\delta</math> 10.31 (s, 1H), 7.93 (s, 2H), 7.09 (dd, <math>J</math> = 8.1, 1.9 Hz, 1H), 6.94 (d, <math>J</math> = 1.5 Hz, 1H), 6.68 (d, <math>J</math> = 8.2 Hz, 1H), 3.82 – 3.65 (m, 2H), 2.64 (t, <math>J</math> = 6.0 Hz, 2H), 2.29 – 2.12 (m, 2H), 1.95 – 1.84 (m, 2H), 0.82 (t, <math>J</math> = 7.1 Hz, 3H).</p> <p><b><sup>13</sup>C NMR (100 MHz, DMSO-d<sub>6</sub>, ppm)</b><br/> <math>\delta</math> 195.01, 179.63, 167.46, 164.78, 159.06, 143.10, 138.22, 126.94, 124.37, 122.62, 113.57, 109.28, 75.73, 58.96, 46.98, 36.99, 26.96, 19.57, 13.12.</p> |
| 15. | <p><b>Ethyl 2-amino-5'-bromo-2',5-dioxo-5,6,7,8-tetrahydrospiro[chromene-4,3'-indoline]-3-carboxylate 9g.</b></p> |  | <p>White Solid, 96% yield; Mp (°C): 261-263</p> <p><b>FT-IR (ATR mode, cm<sup>-1</sup>):</b> 3359, 3190, 1685, 1651, 1527, 1480, 1300, 1222, 1134, 1029, 813, 578.</p> <p><b><sup>1</sup>H NMR (400 MHz, DMSO-d<sub>6</sub>, ppm)</b><br/> <math>\delta</math> 10.32 (s, 1H), 7.93 (s, 2H), 7.22 (d, <math>J</math> = 8.0 Hz, 1H), 7.04 (s, 1H), 6.64 (d, <math>J</math> = 8.1 Hz, 1H), 3.85 – 3.58 (m, 2H), 2.64 (t, <math>J</math> = 5.7 Hz, 2H), 2.35 – 2.08 (m, 2H), 2.02 – 1.77 (m, 2H), 0.83 (t, <math>J</math> = 7.0 Hz, 3H).</p> <p><b><sup>13</sup>C NMR (100 MHz, DMSO-d<sub>6</sub>, ppm)</b><br/> <math>\delta</math> 195.03, 179.51, 167.45, 164.82, 159.06, 143.50, 138.62, 129.81, 125.27,</p>                                                              |

|     |                                                                                                                   |                                                                                     |                                                                                                                                                                                                                                                                                                                                                                                                                                                                                                                                                                                                                                                                                                                                                   |
|-----|-------------------------------------------------------------------------------------------------------------------|-------------------------------------------------------------------------------------|---------------------------------------------------------------------------------------------------------------------------------------------------------------------------------------------------------------------------------------------------------------------------------------------------------------------------------------------------------------------------------------------------------------------------------------------------------------------------------------------------------------------------------------------------------------------------------------------------------------------------------------------------------------------------------------------------------------------------------------------------|
|     |                                                                                                                   |                                                                                     | 113.58, 112.08, 109.91, 75.75, 58.98, 46.94, 37.00, 26.96, 19.57, 13.13.                                                                                                                                                                                                                                                                                                                                                                                                                                                                                                                                                                                                                                                                          |
| 16. | <b>Ethyl 2-amino-5'-fluoro-2',5'-dioxo-5,6,7,8-tetrahydrospiro[chromene-4,3'-indoline]-3-carboxylate 9h.</b>      | 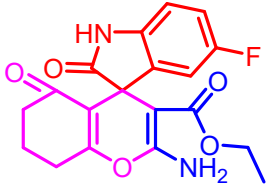   | White Solid, 97% yield; Mp (°C): 223-224<br><br><b>FT-IR (ATR mode, cm<sup>-1</sup>):</b> 3375, 3192, 1689, 1662, 1527, 1477, 1350, 1296, 1188, 1083, 1029, 806, 682, 597, 505.<br><b><sup>1</sup>H NMR (400 MHz, DMSO-d<sub>6</sub>, ppm)</b><br>δ 10.18 (s, 1H), 7.91 (s, 2H), 6.91 – 6.82 (m, 1H), 6.78 (dd, <i>J</i> = 8.2, 2.4 Hz, 1H), 6.63 (dd, <i>J</i> = 8.3, 4.3 Hz, 1H), 3.80 – 3.63 (m, 2H), 2.64 (t, <i>J</i> = 6.0 Hz, 2H), 2.36 – 2.11 (m, 2H), 1.89 (dd, <i>J</i> = 12.3, 6.1 Hz, 2H), 0.90 – 0.74 (m, 3H).<br><b><sup>13</sup>C NMR (100 MHz, DMSO-d<sub>6</sub>, ppm)</b><br>δ 194.95, 179.90, 167.55, 164.63, 159.05, 156.55, 140.40, 137.91, 113.68, 113.16, 110.52, 108.36, 75.89, 58.92, 47.28, 37.06, 27.00, 19.61, 13.14. |
| 17. | <b>Ethyl 6'-amino-3'-methyl-2-oxo-1'-phenyl-1'H-spiro[indoline-3,4'-pyrano[2,3-c]pyrazole]-5'-carboxylate 9i.</b> |  | White Solid, 96% yield; Mp (°C): 208-210<br><br><b>FT-IR (ATR mode, cm<sup>-1</sup>):</b> 3356, 3217, 1689, 1639, 1508, 1377, 1284, 1222, 1134, 1045, 929, 744, 675, 601.<br><b><sup>1</sup>H NMR (400 MHz, DMSO-d<sub>6</sub>, ppm)</b><br>δ 10.52 (s, 1H), 8.22 (s, 2H), 7.82 (d, <i>J</i> = 8.1 Hz, 2H), 7.52 (t, <i>J</i> = 7.9 Hz, 2H), 7.34 (t, <i>J</i> = 7.4 Hz, 1H), 7.18 (t, <i>J</i> = 7.5 Hz, 1H), 6.97 (d, <i>J</i> = 7.2 Hz, 1H), 6.88                                                                                                                                                                                                                                                                                              |

|     |                                                                                                                                  |  |                                                                                                                                                                                                                                                                                                                                                                                                                                                                                                                                                                                                                                                                                                                                                                                                                                                                     |
|-----|----------------------------------------------------------------------------------------------------------------------------------|--|---------------------------------------------------------------------------------------------------------------------------------------------------------------------------------------------------------------------------------------------------------------------------------------------------------------------------------------------------------------------------------------------------------------------------------------------------------------------------------------------------------------------------------------------------------------------------------------------------------------------------------------------------------------------------------------------------------------------------------------------------------------------------------------------------------------------------------------------------------------------|
|     |                                                                                                                                  |  | <p>(dd, <math>J = 16.7, 7.7</math> Hz, 2H), 3.93 – 3.64 (m, 2H), 1.59 (s, 3H), 0.91 – 0.57 (m, 3H).</p> <p><b><math>^{13}\text{C}</math> NMR (100 MHz, DMSO-<math>d_6</math>, ppm)</b></p> <p><math>\delta</math> 179.25, 167.87, 161.32, 144.20, 143.94, 142.18, 137.35, 135.78, 129.41, 127.75, 126.32, 123.17, 121.74, 119.93, 108.82, 98.19, 74.57, 58.99, 47.47, 13.09, 11.71.</p>                                                                                                                                                                                                                                                                                                                                                                                                                                                                             |
| 18. | <p><b>Ethyl 6'-amino-5-bromo-3'-methyl-2-oxo-1'-phenyl-1'H-spiro[indoline-3,4'-pyrano[2,3-c]pyrazole]-5'-carboxylate 9j.</b></p> |  | <p>White Solid, 96% yield; Mp (<math>^{\circ}\text{C}</math>): 254-256</p> <p><b>FT-IR (ATR mode, <math>\text{cm}^{-1}</math>):</b> 3344, 3190, 1698, 1643, 1516, 1400, 1284, 1134, 1041, 810, 744, 690, 543.</p> <p><b><math>^1\text{H}</math> NMR (400 MHz, DMSO-<math>d_6</math>, ppm)</b></p> <p><math>\delta</math> 10.67 (s, 1H), 8.27 (s, 2H), 7.82 (d, <math>J = 8.0</math> Hz, 2H), 7.52 (t, <math>J = 7.8</math> Hz, 2H), 7.35 (t, <math>J = 7.8</math> Hz, 2H), 7.23 (s, 1H), 6.83 (d, <math>J = 8.2</math> Hz, 1H), 3.90 – 3.65 (m, 2H), 1.63 (s, 3H), 0.92 – 0.69 (m, 3H).</p> <p><b><math>^{13}\text{C}</math> NMR (100 MHz, DMSO-<math>d_6</math>, ppm)</b></p> <p><math>\delta</math> 178.91, 167.67, 161.43, 144.08, 143.97, 141.50, 138.24, 137.31, 130.51, 126.40, 126.20, 120.10, 113.42, 110.80, 97.51, 74.04, 59.11, 47.68, 13.16, 11.78.</p> |
| 19. | <p><b>Ethyl 6'-amino-5-fluoro-3'-methyl-2-oxo-1'-phenyl-1'H-spiro[indoline-3,4'-pyrano[2,3-</b></p>                              |  | <p>White Solid, 90% yield; Mp (<math>^{\circ}\text{C}</math>): 199-200</p>                                                                                                                                                                                                                                                                                                                                                                                                                                                                                                                                                                                                                                                                                                                                                                                          |

|     |                                                                                                                                         |                                                                                     |                                                                                                                                                                                                                                                                                                                                                                                                                                                                                                                                                                                                                                                                                                                                                                                                                            |
|-----|-----------------------------------------------------------------------------------------------------------------------------------------|-------------------------------------------------------------------------------------|----------------------------------------------------------------------------------------------------------------------------------------------------------------------------------------------------------------------------------------------------------------------------------------------------------------------------------------------------------------------------------------------------------------------------------------------------------------------------------------------------------------------------------------------------------------------------------------------------------------------------------------------------------------------------------------------------------------------------------------------------------------------------------------------------------------------------|
|     | <p>c]pyrazole]-5'-carboxylate 9k.</p>                                                                                                   | 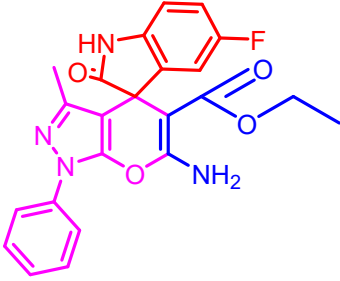   | <p><b>FT-IR (ATR mode, <math>\text{cm}^{-1}</math>):</b> 3387, 3190, 1720, 1685, 1635, 1485, 1384, 1276, 1122, 1033, 802, 694, 586.</p> <p><b><math>^1\text{H}</math> NMR (400 MHz, DMSO-<math>d_6</math>, ppm)</b><br/> <math>\delta</math> 10.55 (s, 1H), 8.26 (s, 2H), 7.82 (d, <math>J = 8.3</math> Hz, 2H), 7.52 (t, <math>J = 7.8</math> Hz, 2H), 7.35 (t, <math>J = 7.3</math> Hz, 1H), 7.08 – 6.91 (m, 2H), 6.85 (dd, <math>J = 8.3, 4.2</math> Hz, 1H), 3.91 – 3.64 (m, 2H), 1.62 (s, 3H), 0.81 (m, <math>J = 14.1, 7.1</math> Hz, 3H).</p> <p><b><math>^{13}\text{C}</math> NMR (100 MHz, DMSO-<math>d_6</math>, ppm)</b><br/> <math>\delta</math> 179.29, 167.73, 161.40, 157.14, 144.07, 138.37, 137.33, 129.40, 126.38, 120.00, 114.03, 111.25, 111.01, 109.52, 97.64, 74.15, 59.05, 48.01, 13.14, 11.73.</p> |
| 20. | <p><b>Ethyl 2'-amino-7',7'-dimethyl-2,5'-dioxo-5',6',7',8'-tetrahydro-2H-spiro[acenaphthylene-1,4'-chromene]-3'-carboxylate 9l.</b></p> |  | <p>White Solid, 95% yield; Mp (<math>^{\circ}\text{C}</math>): 244-246</p> <p><b>FT-IR (ATR mode, <math>\text{cm}^{-1}</math>):</b> 3387, 3278, 2966, 1720, 1654, 1523, 1338, 1303, 1219, 1080, 771, 597, 509.</p> <p><b><math>^1\text{H}</math> NMR (400 MHz, DMSO-<math>d_6</math>, ppm)</b><br/> <math>\delta</math> 8.18 (d, <math>J = 7.8</math> Hz, 1H), 8.03 (s, 2H), 7.85 (m, <math>J = 21.2, 13.6, 7.7</math> Hz, 3H), 7.68 – 7.57 (m, 1H), 7.33 (d, <math>J = 6.8</math> Hz, 1H), 3.42 – 3.35 (m, 2H), 2.69 (dd, <math>J = 41.4, 17.6</math> Hz, 2H), 2.09 (dd, <math>J = 60.2, 16.0</math> Hz, 2H), 1.10 (s, 3H), 1.03 (s, 3H), 0.04 (t, <math>J = 7.1</math> Hz, 3H).</p>                                                                                                                                      |

|     |                                                                                                                                         |                                                                                   |                                                                                                                                                                                                                                                                                                                                                                                                                                                                                                                                                                                                                                                                                                                                                                                                                                  |
|-----|-----------------------------------------------------------------------------------------------------------------------------------------|-----------------------------------------------------------------------------------|----------------------------------------------------------------------------------------------------------------------------------------------------------------------------------------------------------------------------------------------------------------------------------------------------------------------------------------------------------------------------------------------------------------------------------------------------------------------------------------------------------------------------------------------------------------------------------------------------------------------------------------------------------------------------------------------------------------------------------------------------------------------------------------------------------------------------------|
|     |                                                                                                                                         |                                                                                   | <p><b><sup>13</sup>C NMR (100 MHz, DMSO-d<sub>6</sub>, ppm)</b></p> <p>δ 205.17, 195.24, 167.43, 162.93, 159.37, 145.28, 140.61, 135.97, 129.41, 129.23, 128.20, 127.69, 123.75, 119.11, 118.99, 114.84, 77.19, 58.38, 50.68, 50.00, 31.68, 27.76, 26.69, 12.18.</p>                                                                                                                                                                                                                                                                                                                                                                                                                                                                                                                                                             |
| 21. | <p><b>Ethyl 2'-amino-7',7'-dimethyl-2,5'-dioxo-5',6',7',8'-tetrahydro-2H-spiro[acenaphthylene-1,4'-chromene]-3'-carboxylate 9m.</b></p> | 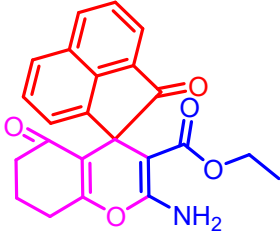 | <p>White Solid, 94% yield; Mp (°C): 261-263</p> <p><b>FT-IR (ATR mode, cm<sup>-1</sup>):</b> 3390, 3302, 1716, 1678, 1604, 1519, 1342, 1292, 1249, 1195, 1080, 1018, 887, 786, 536, 500.</p> <p><b><sup>1</sup>H NMR (400 MHz, DMSO-d<sub>6</sub>, ppm)</b></p> <p>δ 8.19 (d, <i>J</i> = 7.7 Hz, 1H), 8.02 (s, 2H), 7.95 – 7.75 (m, 3H), 7.63 (t, <i>J</i> = 7.6 Hz, 1H), 7.35 (d, <i>J</i> = 6.8 Hz, 1H), 3.46 – 3.24 (m, 3H), 2.79 (t, <i>J</i> = 5.7 Hz, 2H), 2.33 – 2.07 (m, 2H), 1.98 (dd, <i>J</i> = 11.6, 5.9 Hz, 2H), 0.04 (t, <i>J</i> = 7.0 Hz, 3H).</p> <p><b><sup>13</sup>C NMR (100 MHz, DMSO-d<sub>6</sub>, ppm)</b></p> <p>δ 205.45, 195.63, 167.61, 164.97, 159.39, 145.55, 140.70, 136.11, 129.54, 129.30, 128.38, 127.83, 123.85, 119.35, 119.21, 116.08, 77.40, 58.55, 50.91, 36.56, 26.90, 19.81, 12.30.</p> |
| 22. | <p><b>Ethyl (Z)-2-(5-chloro-2-oxoindolin-3-ylidene)-2-cyanoacetate</b></p>                                                              |                                                                                   | <p>Red Solid,</p> <p><b>FT-IR (ATR mode, cm<sup>-1</sup>):</b> 3356, 3250, 2218, 1720, 1581, 1438, 1249, 1168, 1018, 844, 763, 605, 555.</p>                                                                                                                                                                                                                                                                                                                                                                                                                                                                                                                                                                                                                                                                                     |

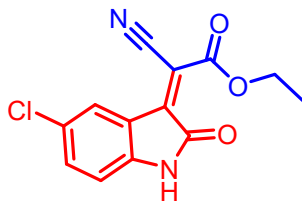

**<sup>1</sup>H NMR (400 MHz, DMSO-d<sub>6</sub>, ppm)**

δ 11.23 (s, 1H), 8.23 (d, *J* = 2.0 Hz, 1H), 7.53 (dd, *J* = 8.4, 2.2 Hz, 1H), 6.90 (d, *J* = 8.4 Hz, 1H), 4.42 (q, *J* = 7.1 Hz, 2H), 1.35 (t, *J* = 7.1 Hz, 3H).

**<sup>13</sup>C NMR (100 MHz, DMSO-d<sub>6</sub>, ppm)**

δ 164.98, 161.14, 144.81, 144.67, 135.26, 128.96, 125.79, 120.12, 113.95, 112.25, 106.17, 63.27, 13.73, 13.50.

**DEPT-135 NMR (100 MHz, DMSO-**

**d<sub>6</sub>, ppm) δ 135.02, 128.72, 112.59, 112.01, 63.04, 13.50.**

**HRMS (ESI, +ve mode):** Calculated for C<sub>13</sub>H<sub>9</sub>ClN<sub>2</sub>O<sub>3</sub> [M+H]<sup>+</sup> m/z: 277.0380; Found [M+H]<sup>+</sup>: 277.0421.

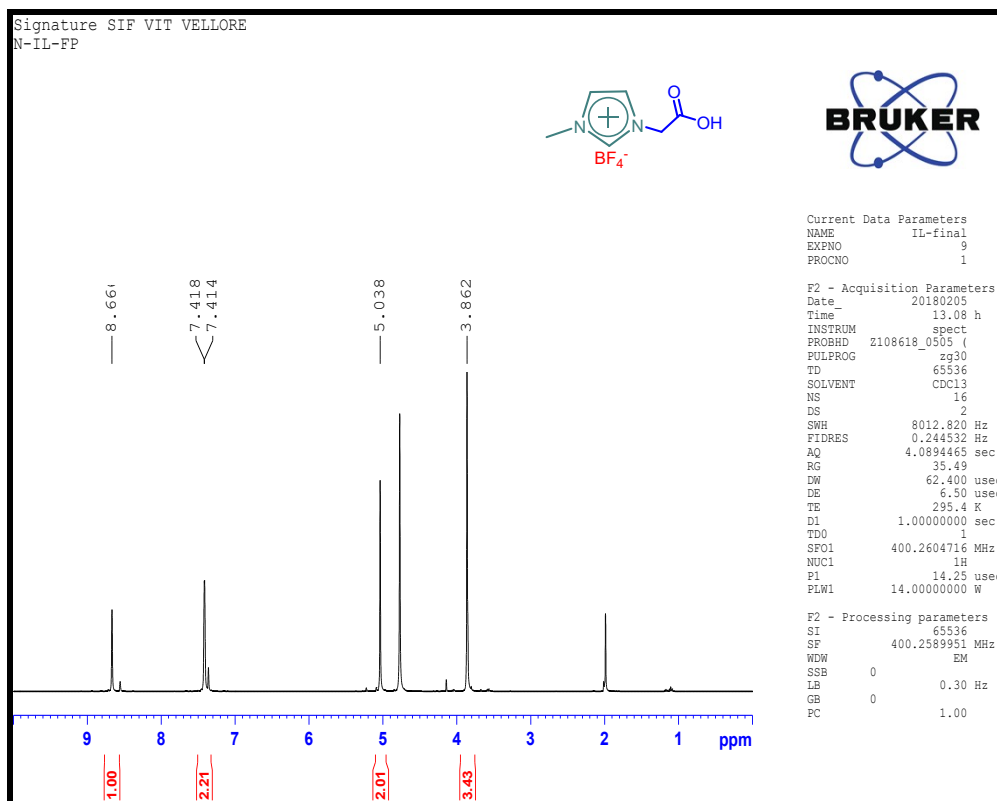

Figure S1. <sup>1</sup>H NMR spectrum (400 MHz) of **4** in D<sub>2</sub>O

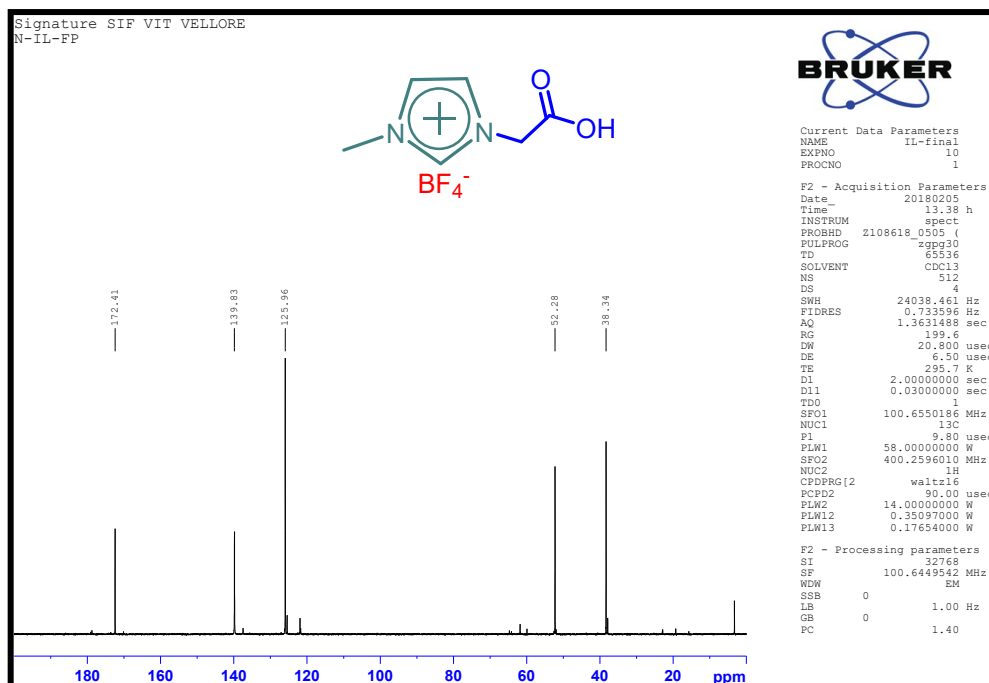

Figure S2. <sup>13</sup>C NMR spectrum (100 MHz) of **4** in D<sub>2</sub>O

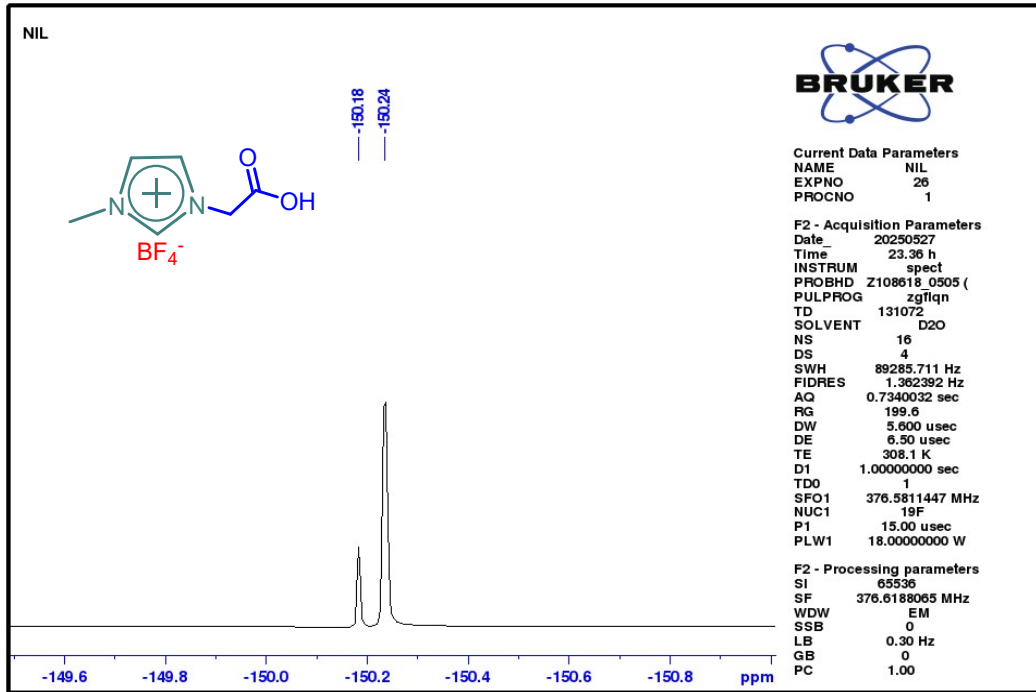

**Figure S3.**  $^{19}\text{F}$  NMR spectrum (400 MHz) of **4** in  $\text{D}_2\text{O}$  (an isotopic chemical shift of the  $\text{BF}_4^-$  peak can be seen, which is due to the two boron isotopes  $^{10}\text{B}$  and  $^{11}\text{B}$ ).

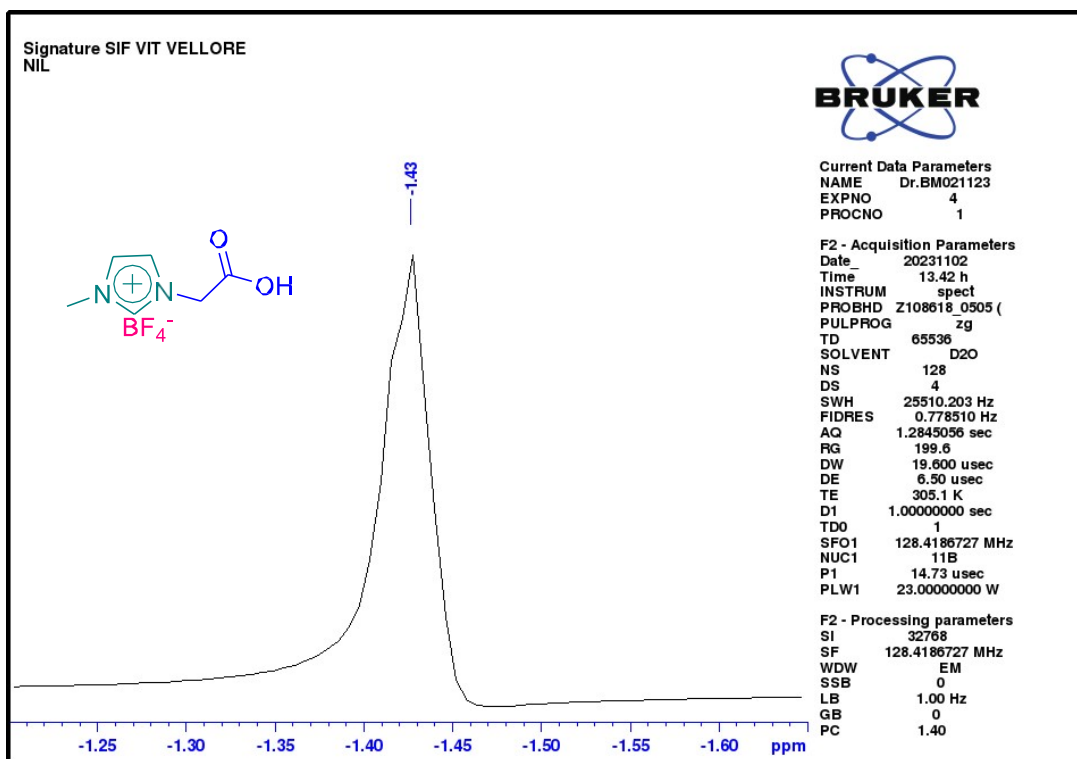

Figure S4.  $^{11}\text{B}$  NMR spectrum (128 MHz) of **4** in  $\text{D}_2\text{O}$ .

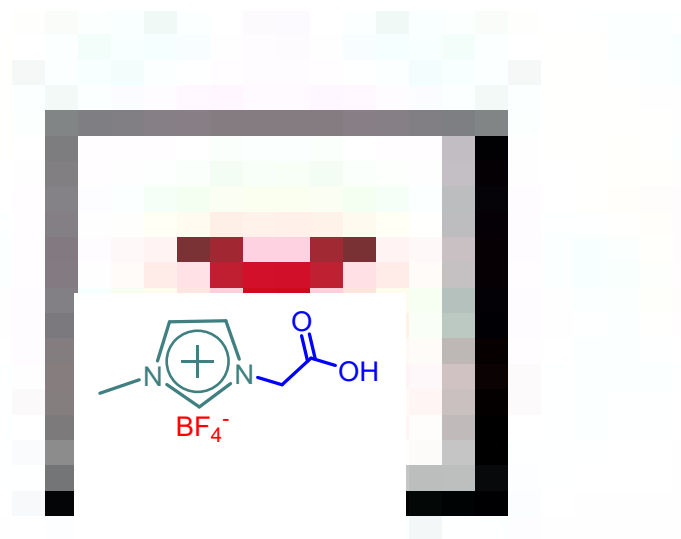

Figure S5. FT-IR spectrum of **4**

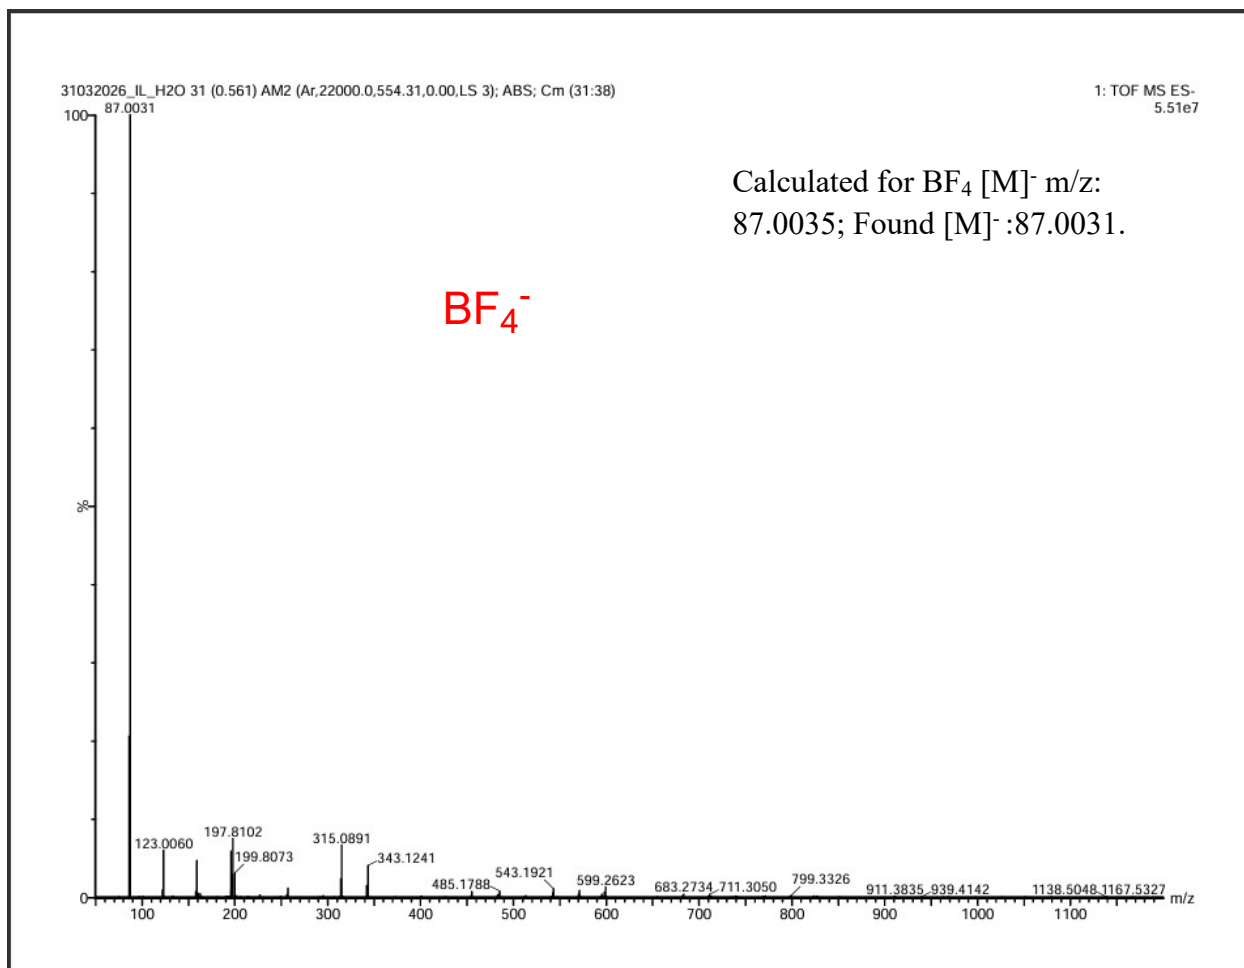

**Figure S6.** HRMS (-ve mode) of recycled ionic liquid.

## Symmetric Compounds **8a-8g**

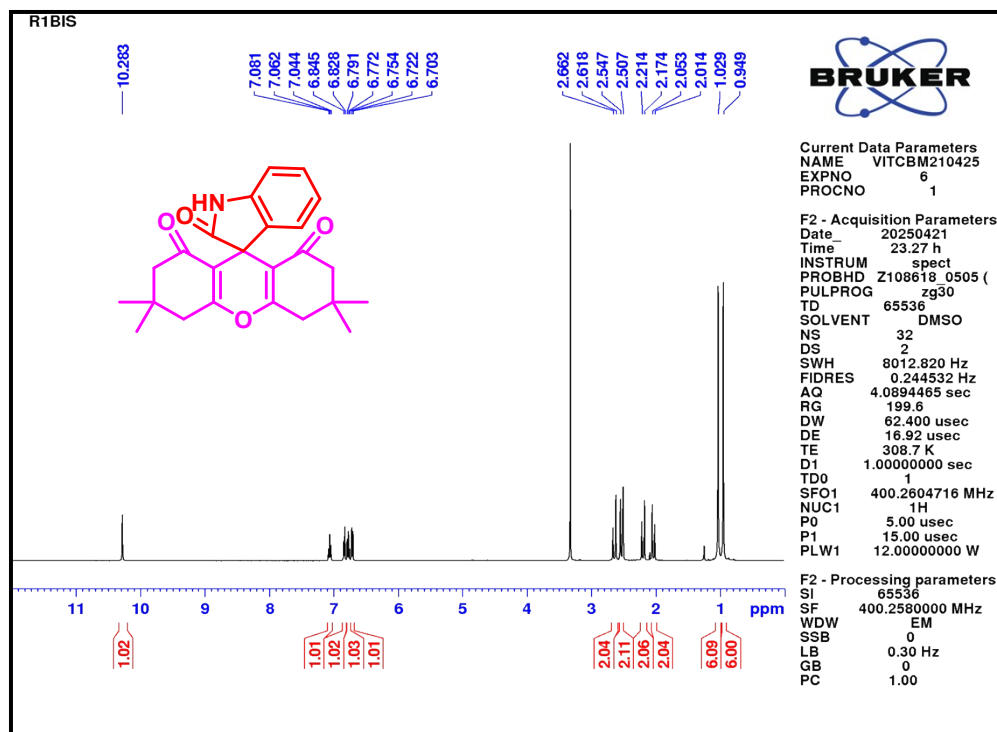

Figure S7.  $^1\text{H}$  NMR spectrum (400 MHz) of **8a** in DMSO- $d_6$ .

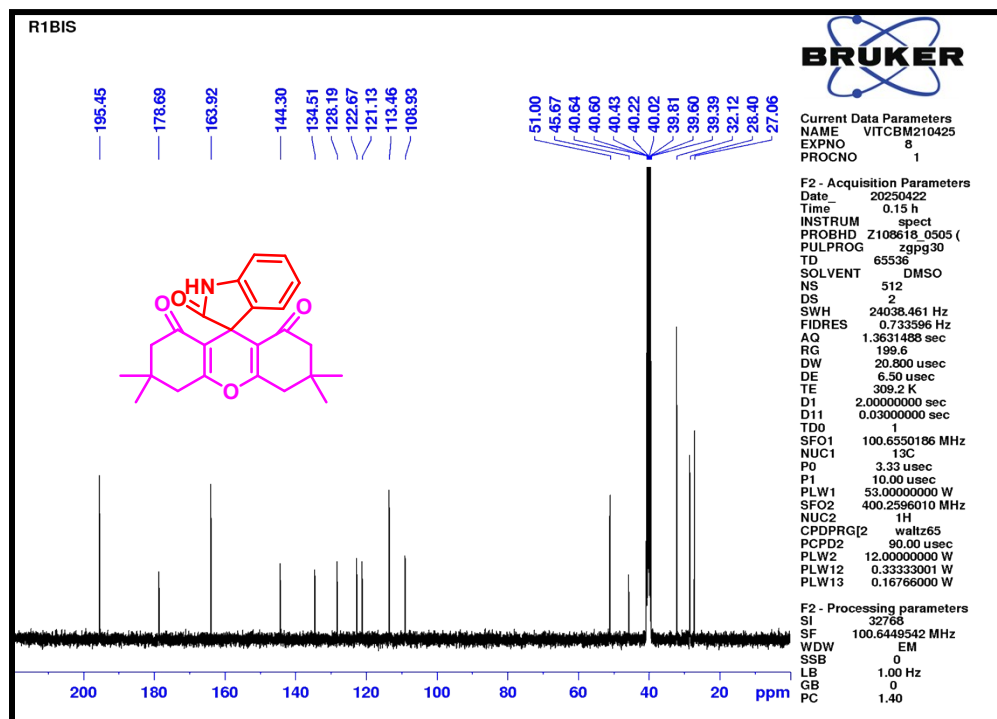

Figure S8.  $^{13}\text{C}$  NMR spectrum (100 MHz) of **8a** in DMSO- $d_6$ .

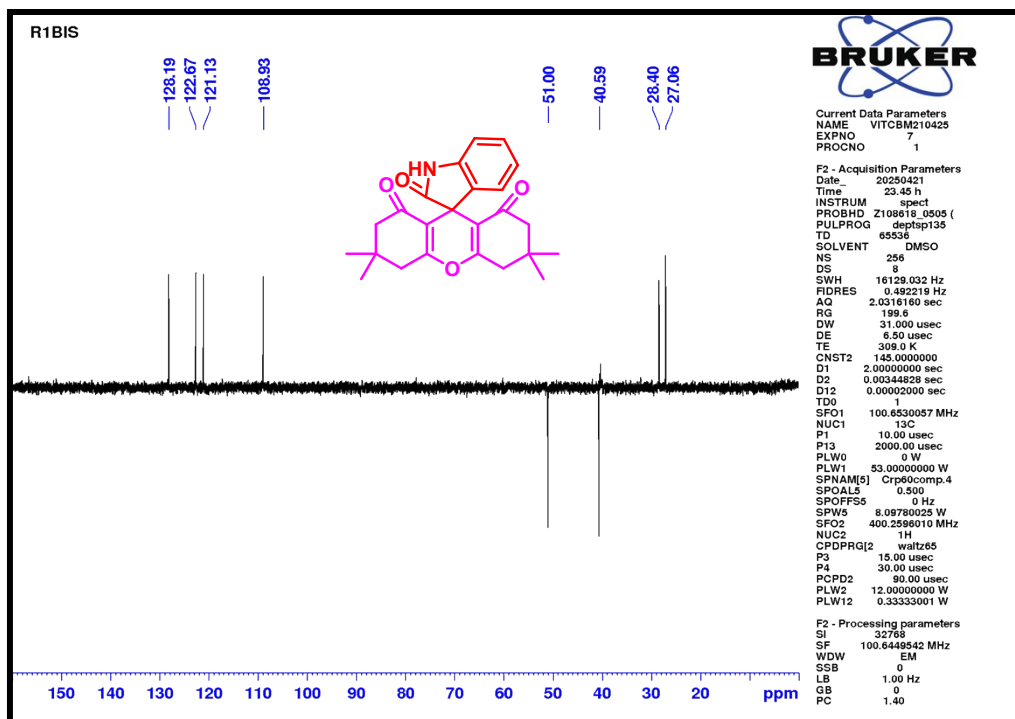

Figure S9. DEPT-135 spectrum (100 MHz) of **8a** in DMSO- $d_6$ .

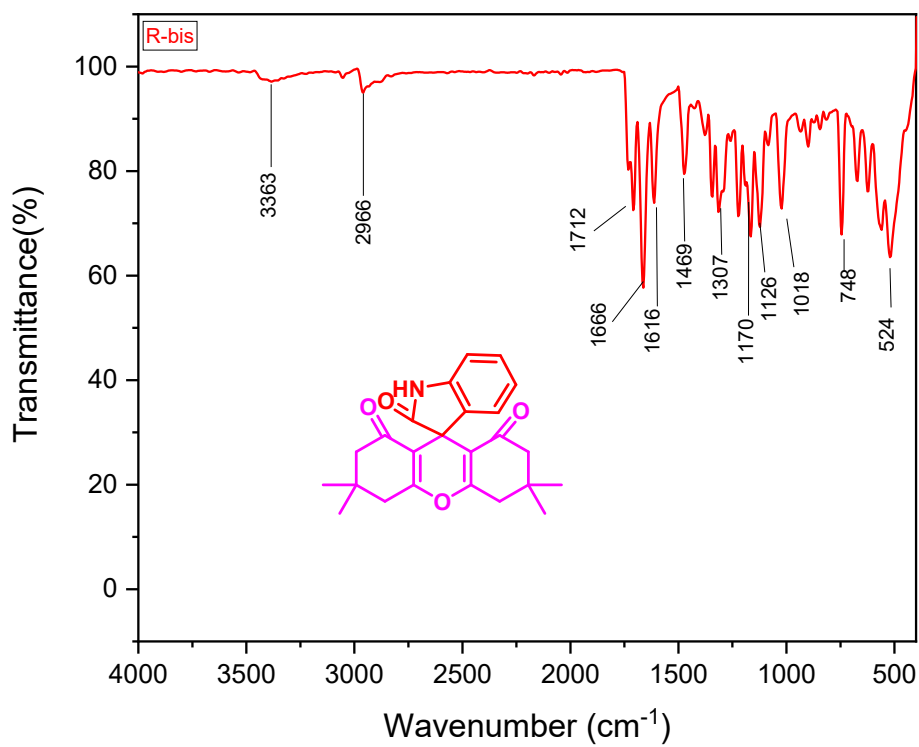

Figure S10. FT-IR spectrum of **8a**.

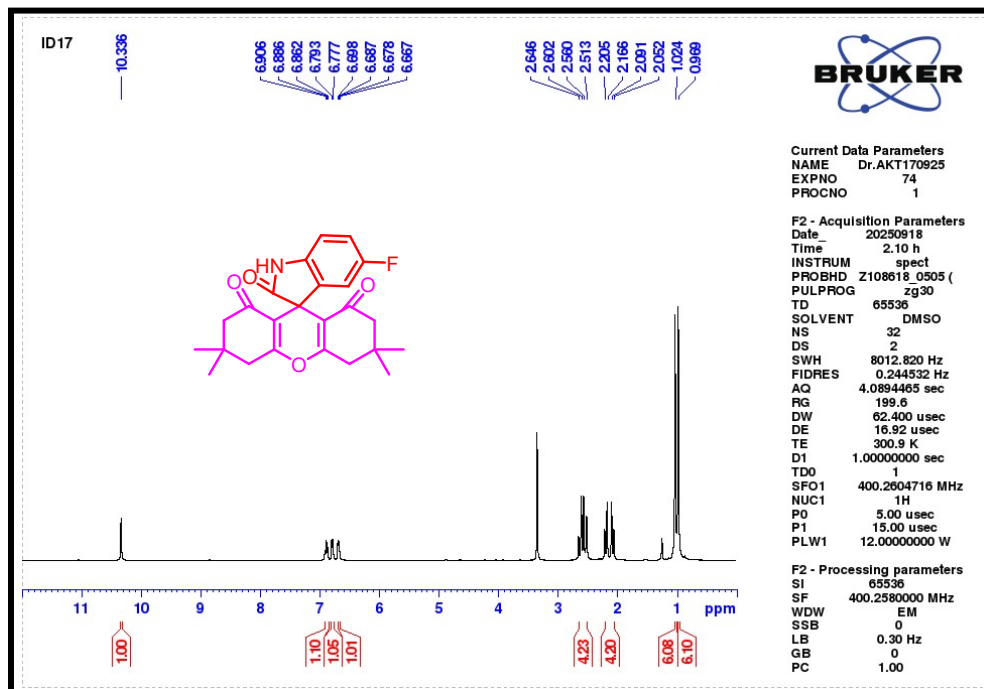

Figure S11.  $^1\text{H}$  NMR spectrum (400 MHz) of **8b** in DMSO- $d_6$ .

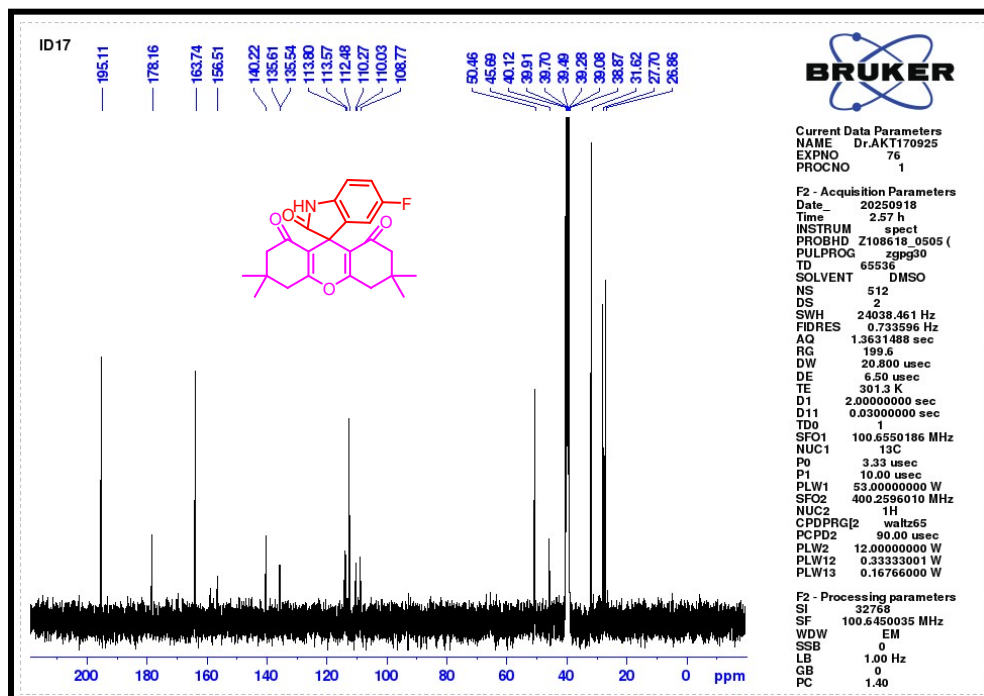

Figure S12.  $^{13}\text{C}$  NMR spectrum (100 MHz) of **8b** in DMSO- $d_6$ .

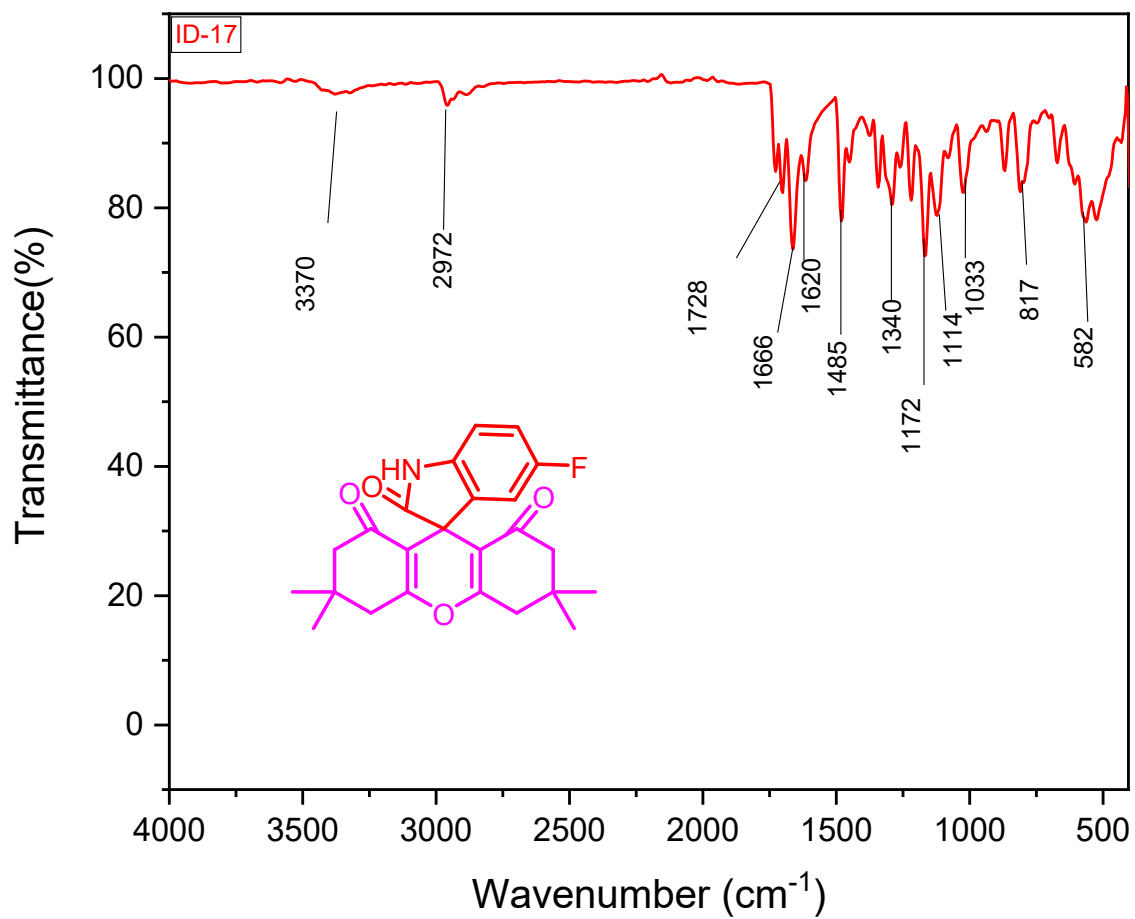

**Figure S13.** FT-IR spectrum of **8b**.

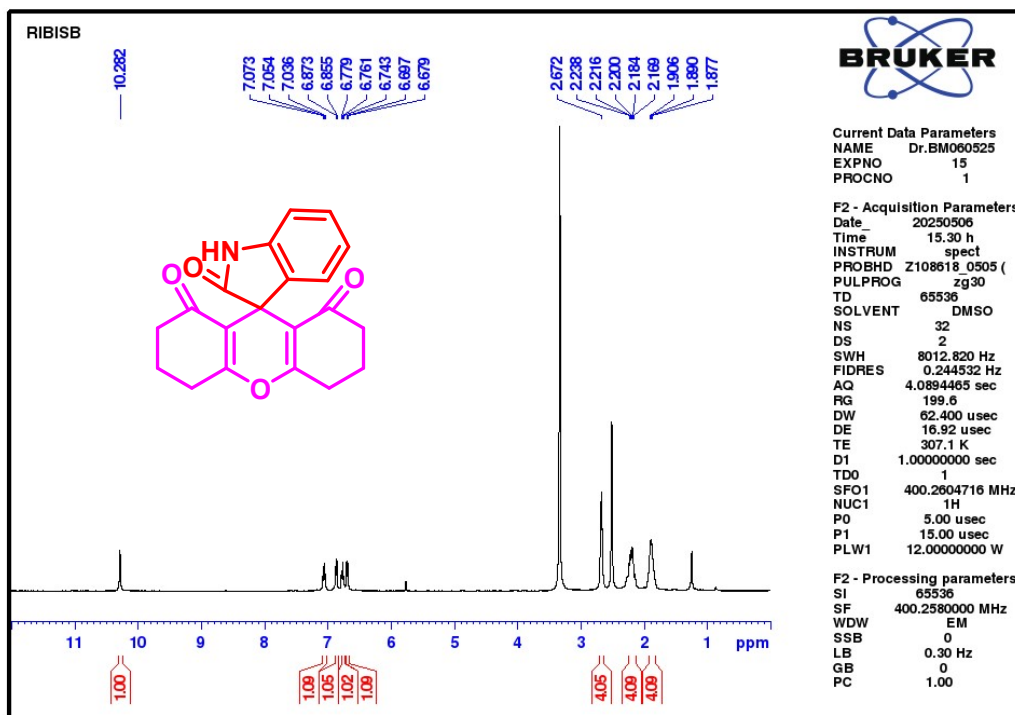

Figure S14.  $^1\text{H}$  NMR spectrum (400 MHz) of **8c** in DMSO- $d_6$ .

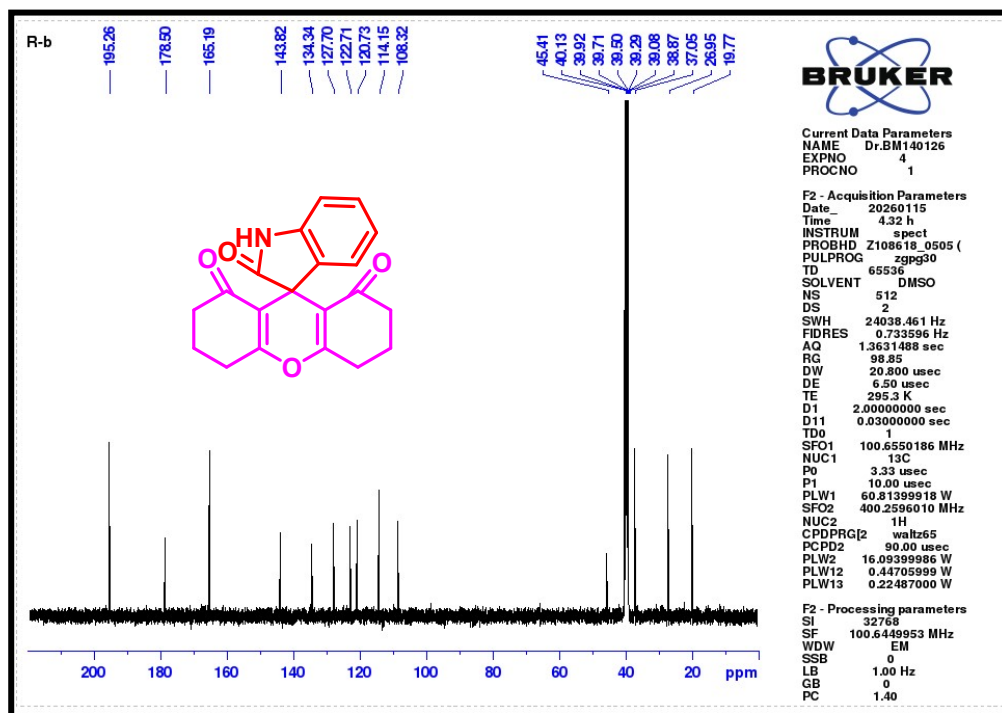

Figure S15.  $^{13}\text{C}$  NMR spectrum (100 MHz) of **8c** in DMSO- $d_6$ .

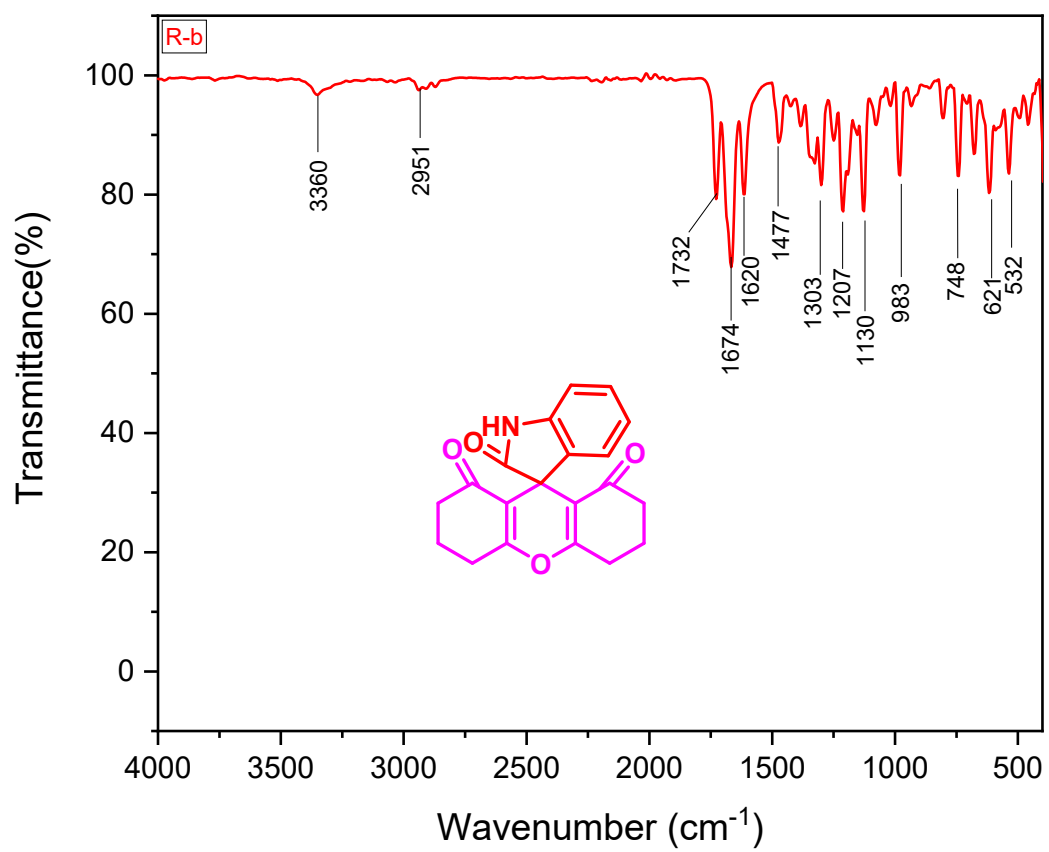

**Figure S16.** FT-IR spectrum of **8c**.

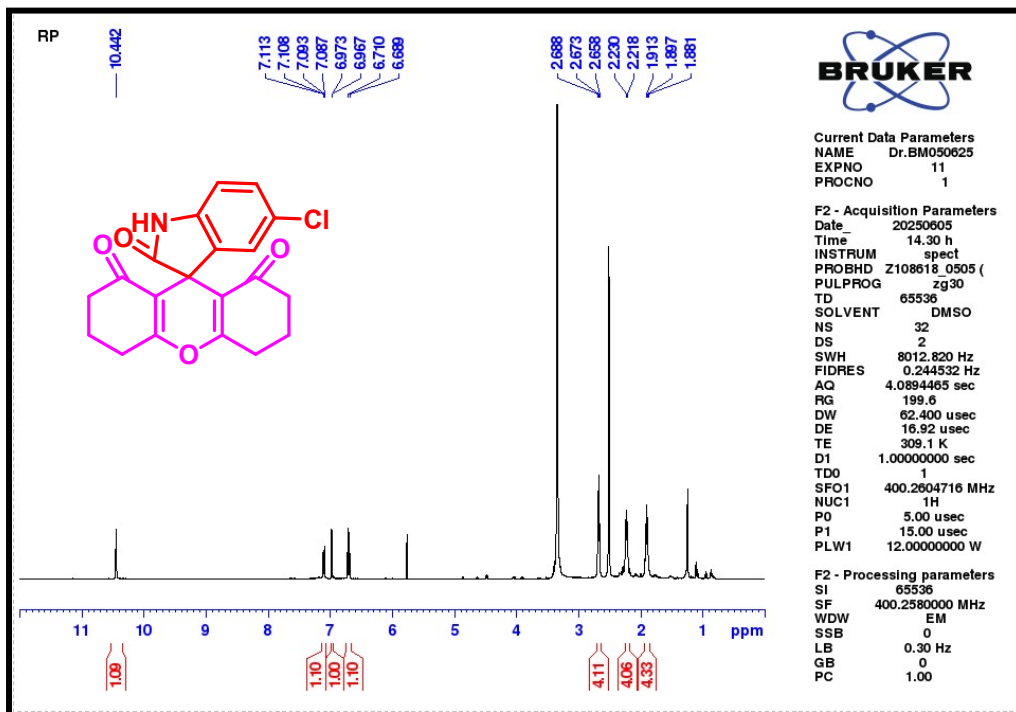

Figure S17.  $^1\text{H}$  NMR spectrum (400 MHz) of **8d** in  $\text{DMSO-d}_6$ .

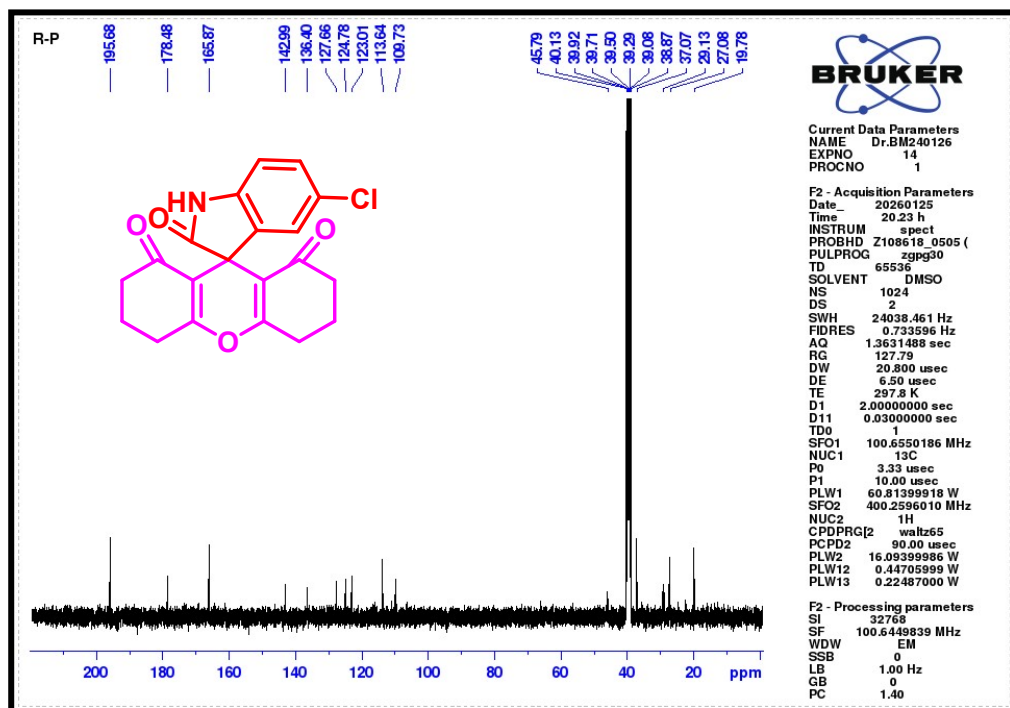

Figure S18.  $^{13}\text{C}$  NMR spectrum (100 MHz) of **8d** in  $\text{DMSO-d}_6$ .

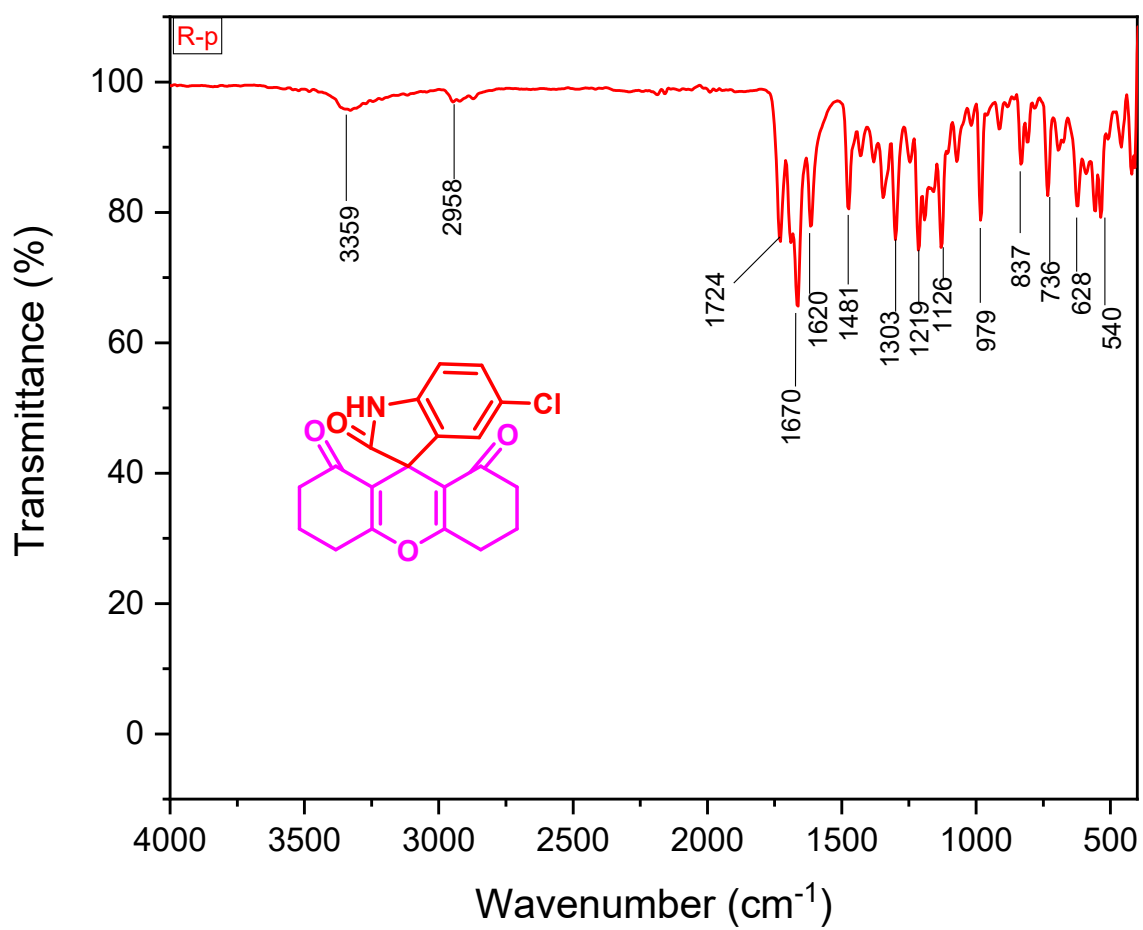

**Figure S19.** FT-IR spectrum of **8d**.

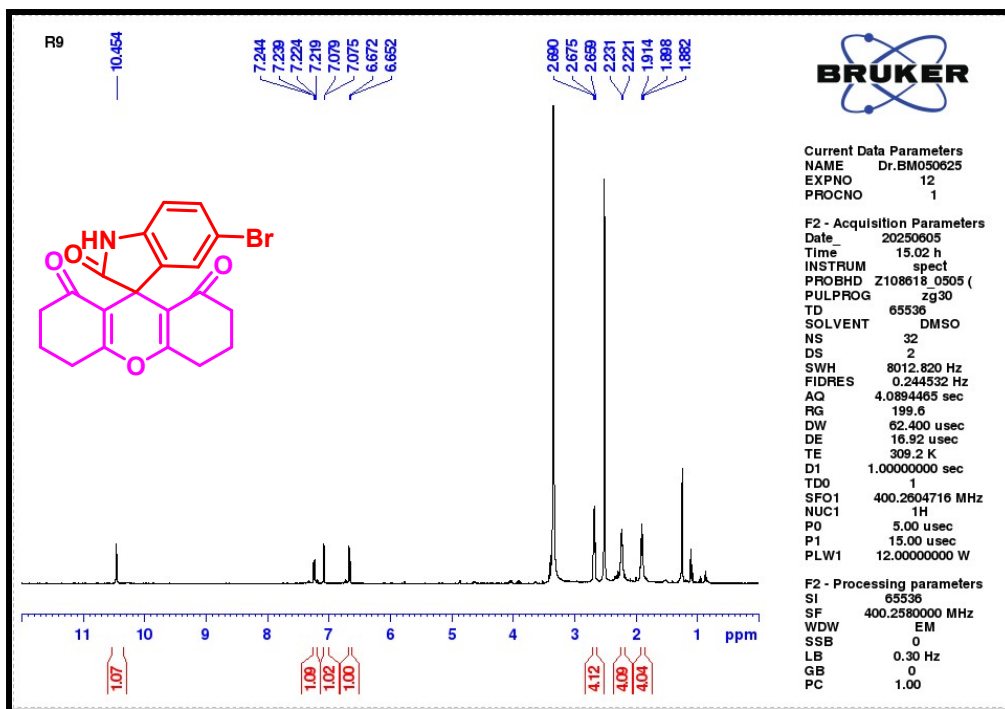

Figure S20.  $^1\text{H}$  NMR spectrum (400 MHz) of **8e** in  $\text{DMSO-d}_6$ .

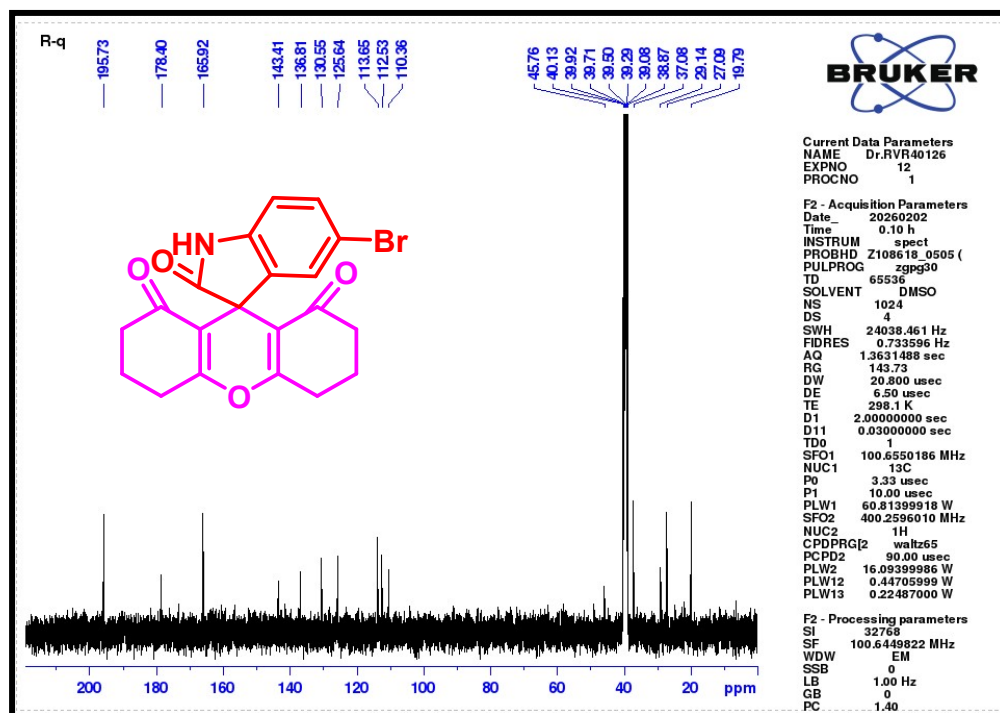

Figure S21.  $^{13}\text{C}$  NMR spectrum (100 MHz) of **8e** in  $\text{DMSO-d}_6$ .

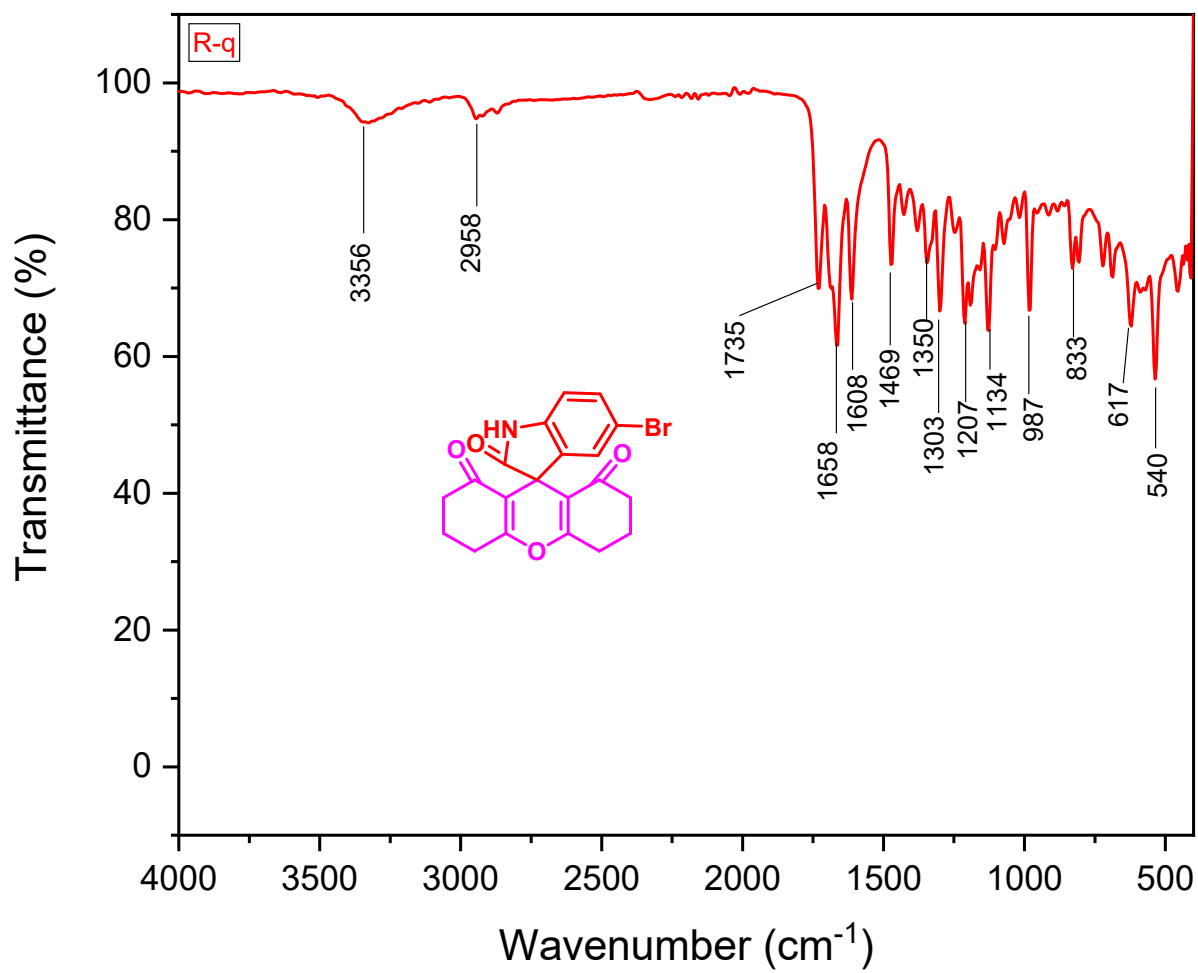

**Figure S22.** FT-IR spectrum of **8e**.

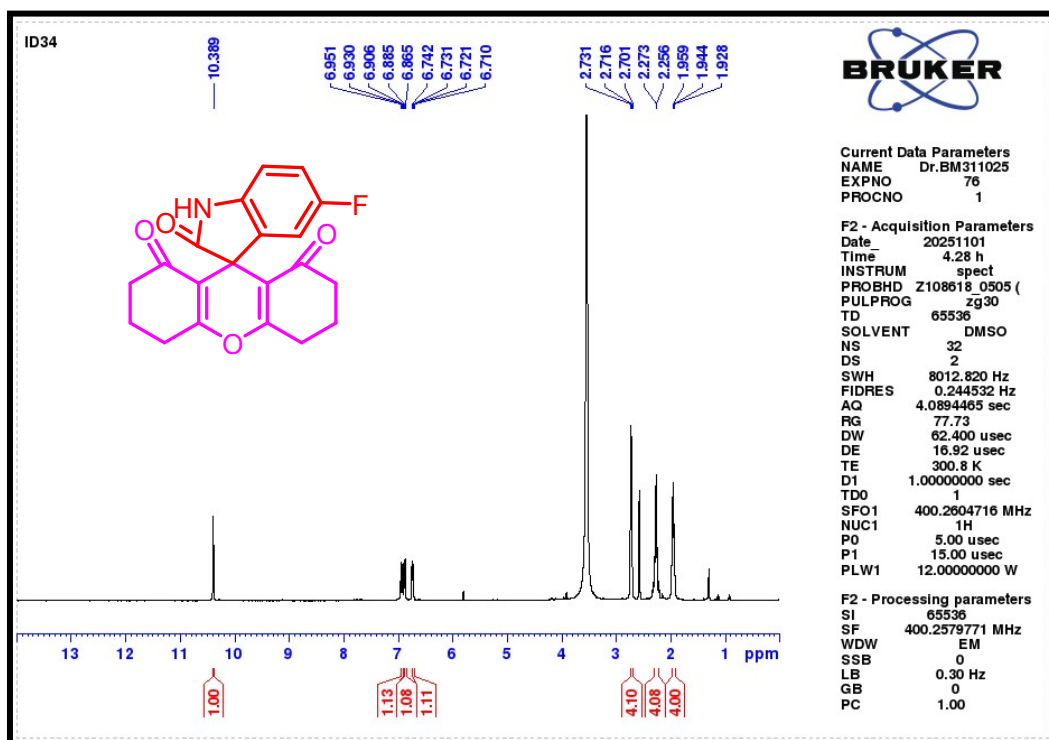

Figure S23.  $^1\text{H}$  NMR spectrum (400 MHz) of **8f** in  $\text{DMSO-d}_6$ .

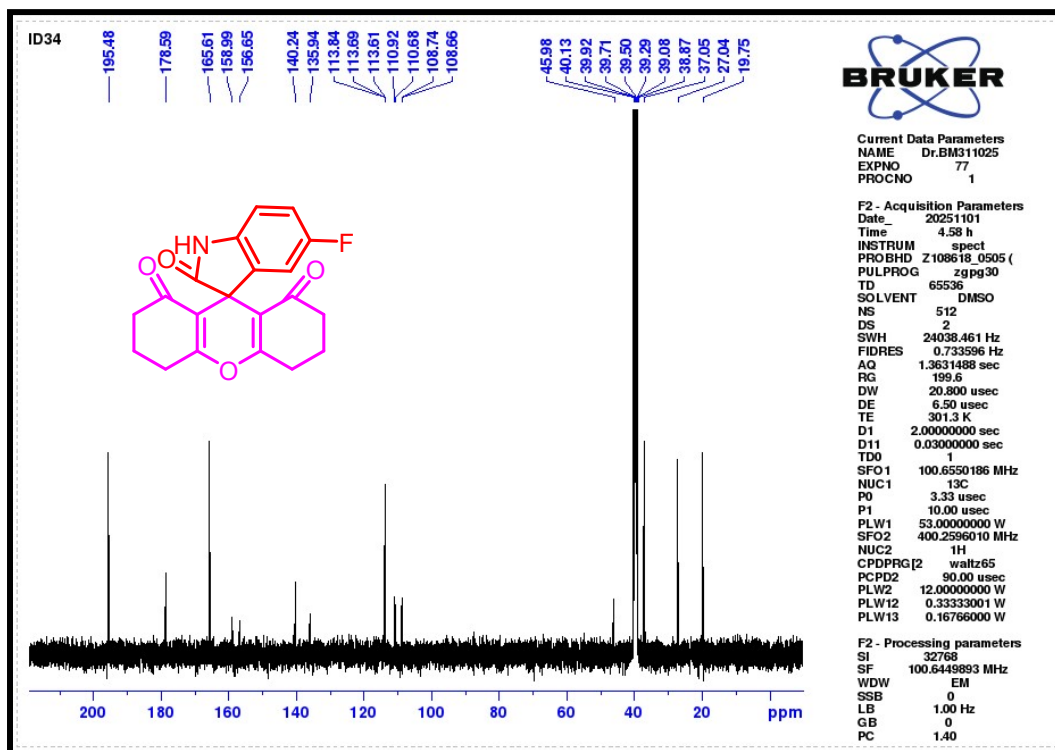

Figure S24.  $^{13}\text{C}$  NMR spectrum (100 MHz) of **8f** in  $\text{DMSO-d}_6$ .

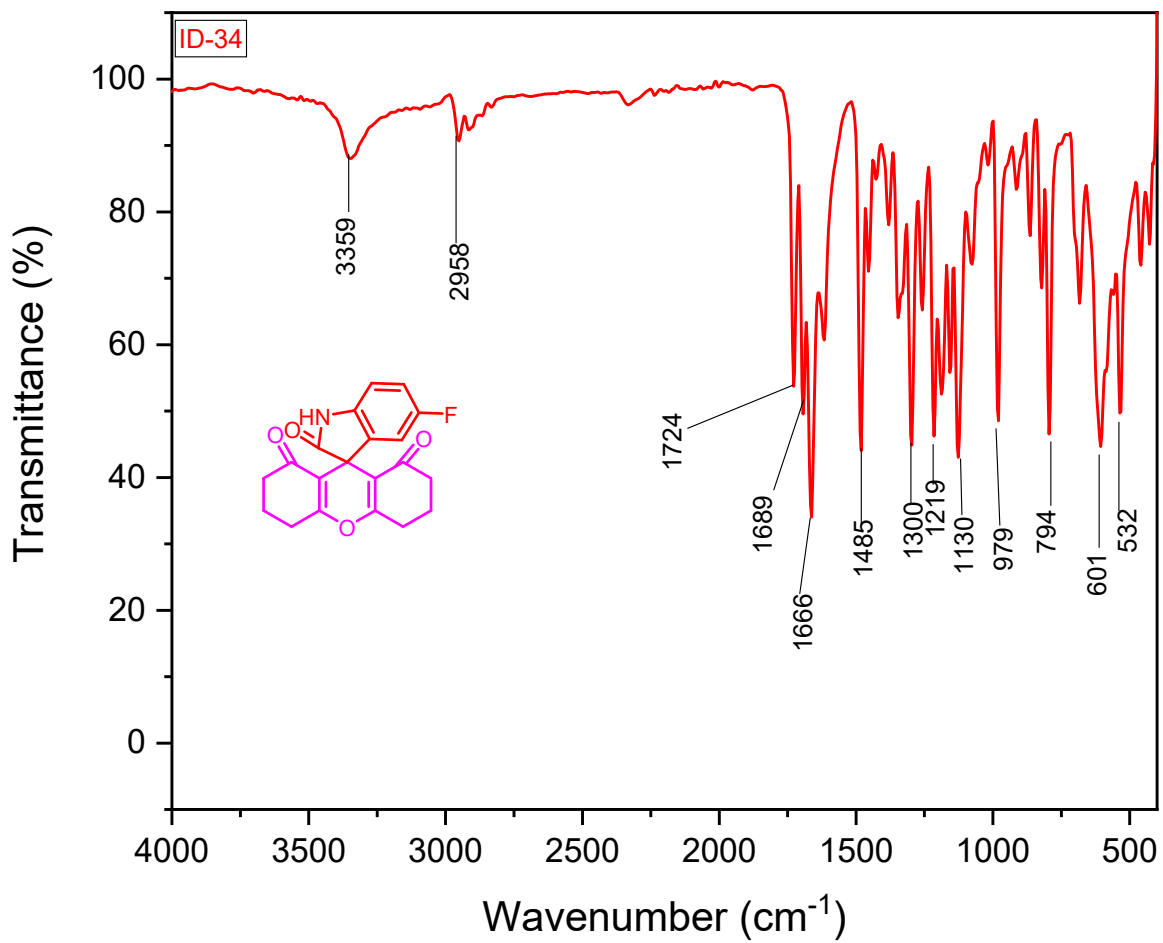

**Figure S25.** FT-IR spectrum of **8f**.

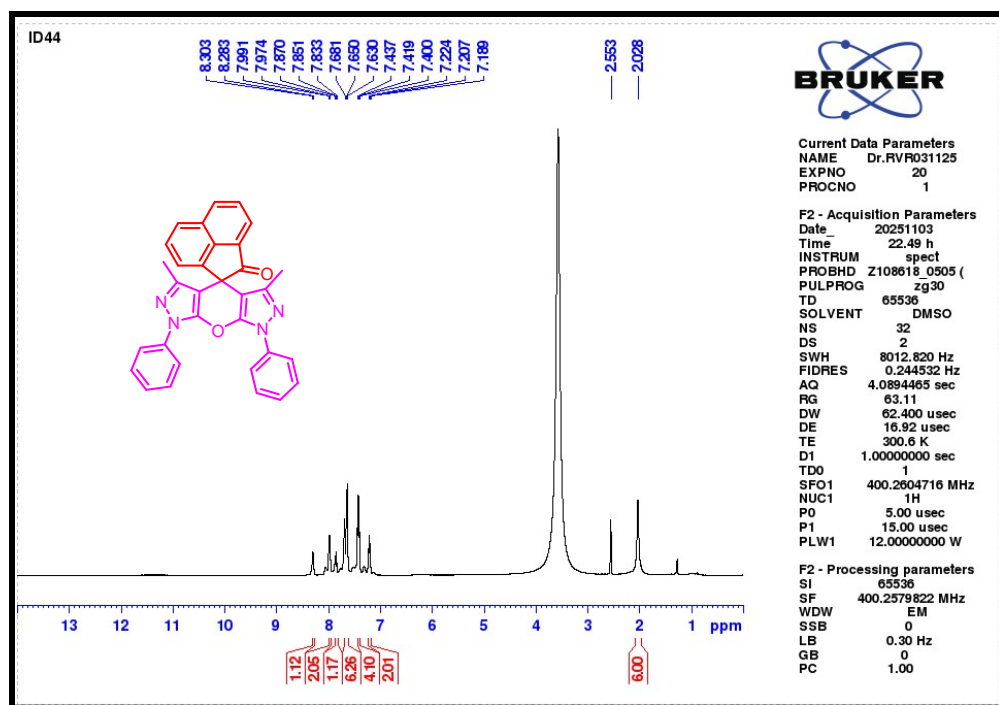

Figure S26.  $^1\text{H}$  NMR spectrum (400 MHz) of **8g** in  $\text{DMSO-d}_6$ .

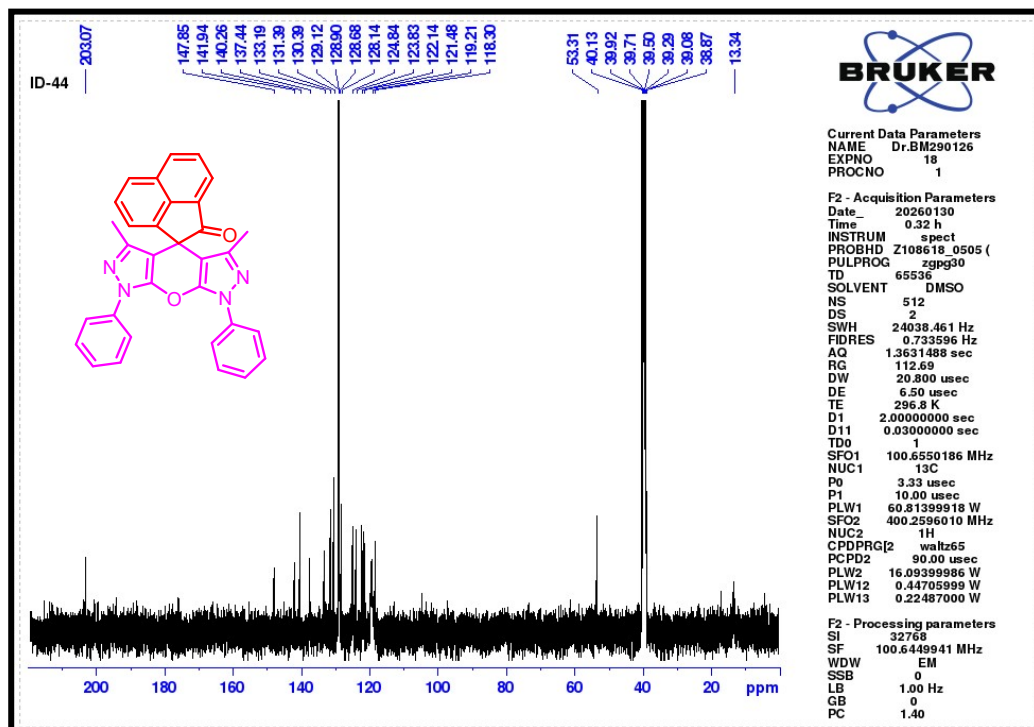

Figure S27.  $^{13}\text{C}$  NMR spectrum (100 MHz) of **8g** in  $\text{DMSO-d}_6$ .

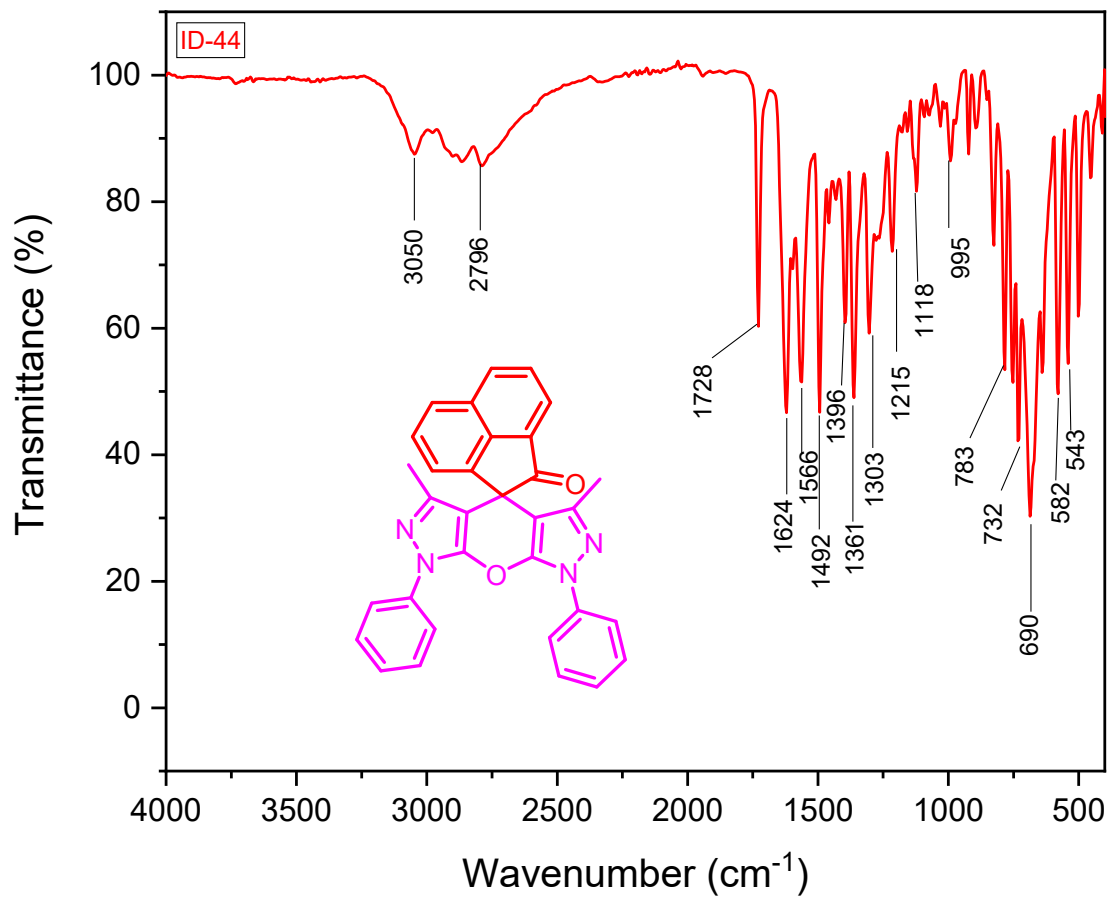

**Figure S28.** FT-IR spectrum of **8g**.

## Unsymmetric Compounds 9a-9m

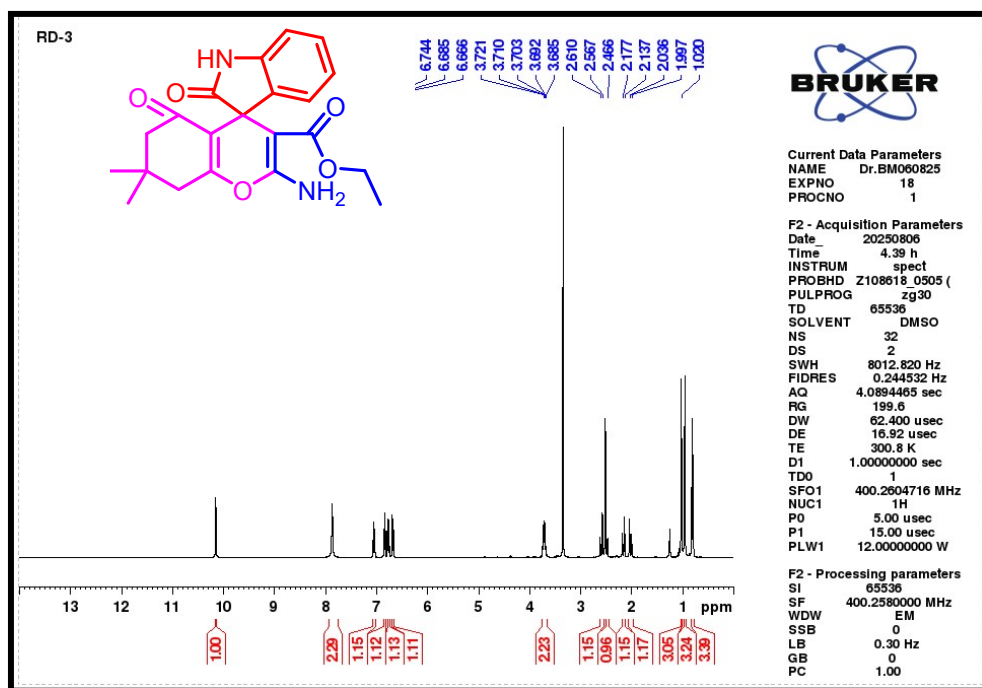

**Figure S29.**  $^1\text{H}$  NMR spectrum (400 MHz) of **9a** in  $\text{DMSO-d}_6$ .

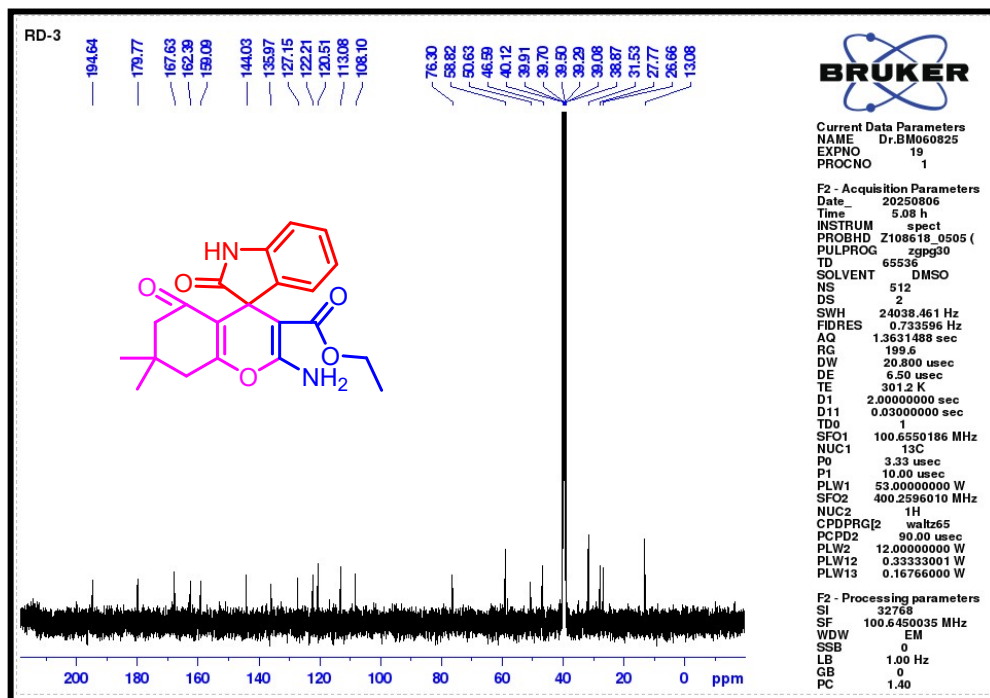

**Figure S30.**  $^{13}\text{C}$  NMR spectrum (100 MHz) of **9a** in  $\text{DMSO-d}_6$ .

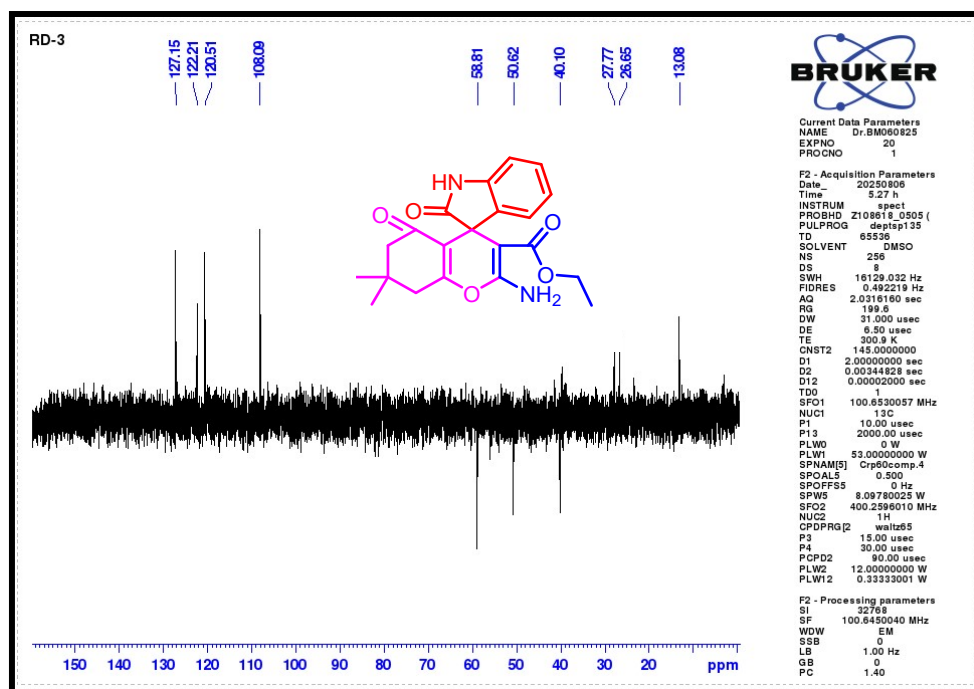

Figure S31. DEPT-135 spectrum (100 MHz) of **9a** in DMSO- $d_6$ .

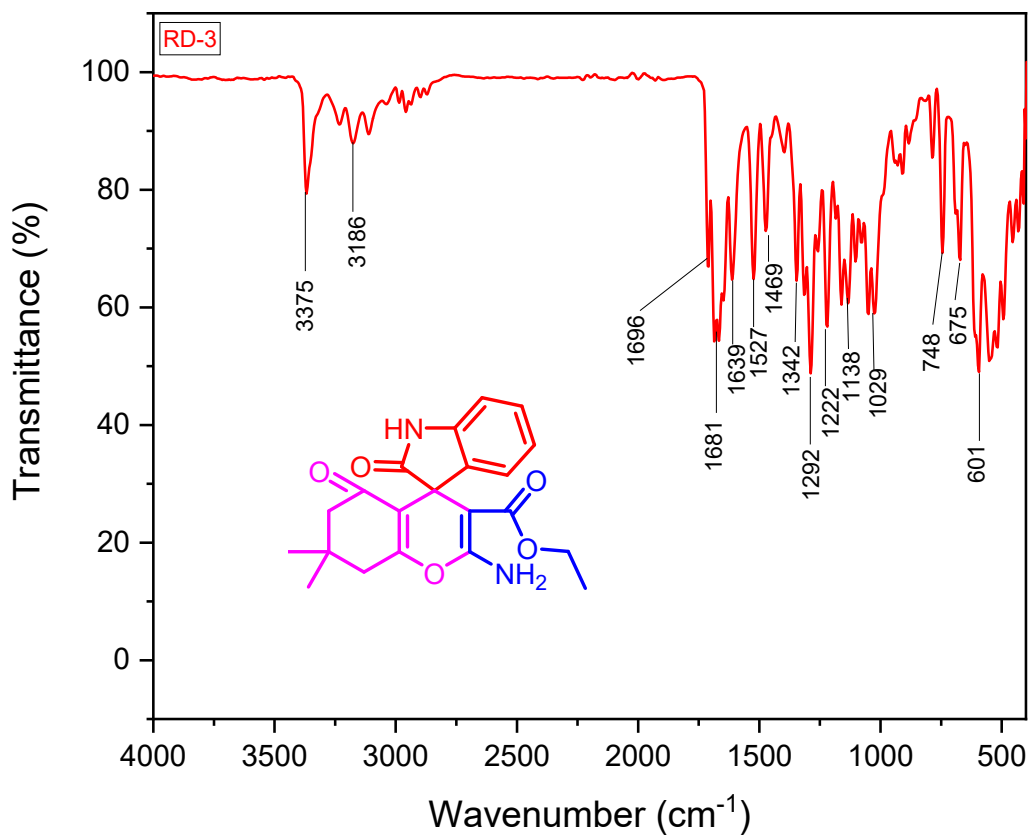

Figure S32. FT-IR spectrum of **9a**.

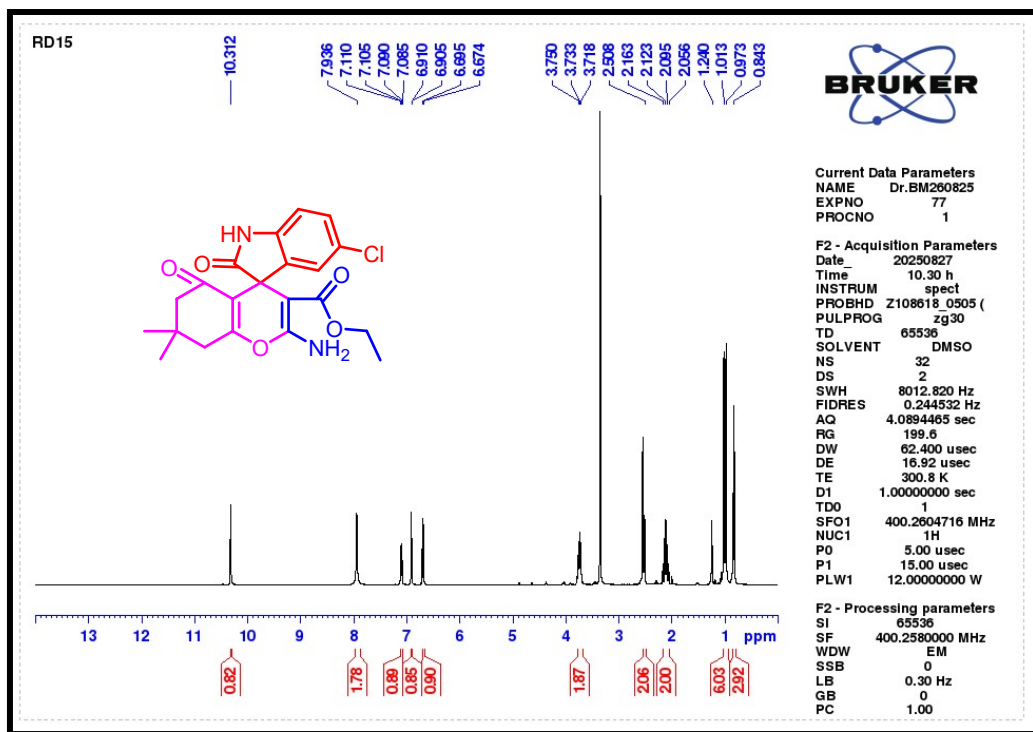

Figure S33.  $^1\text{H}$  NMR spectrum (400 MHz) of **9b** in  $\text{DMSO-d}_6$ .

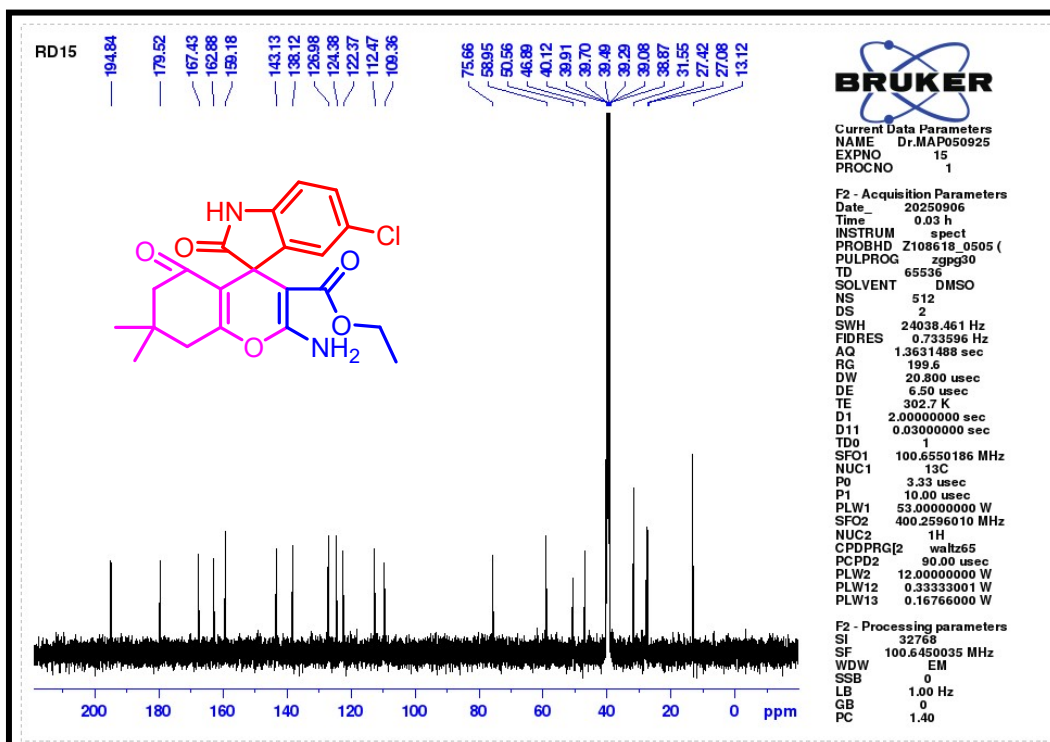

Figure S34.  $^{13}\text{C}$  NMR spectrum (100 MHz) of **9b** in  $\text{DMSO-d}_6$ .

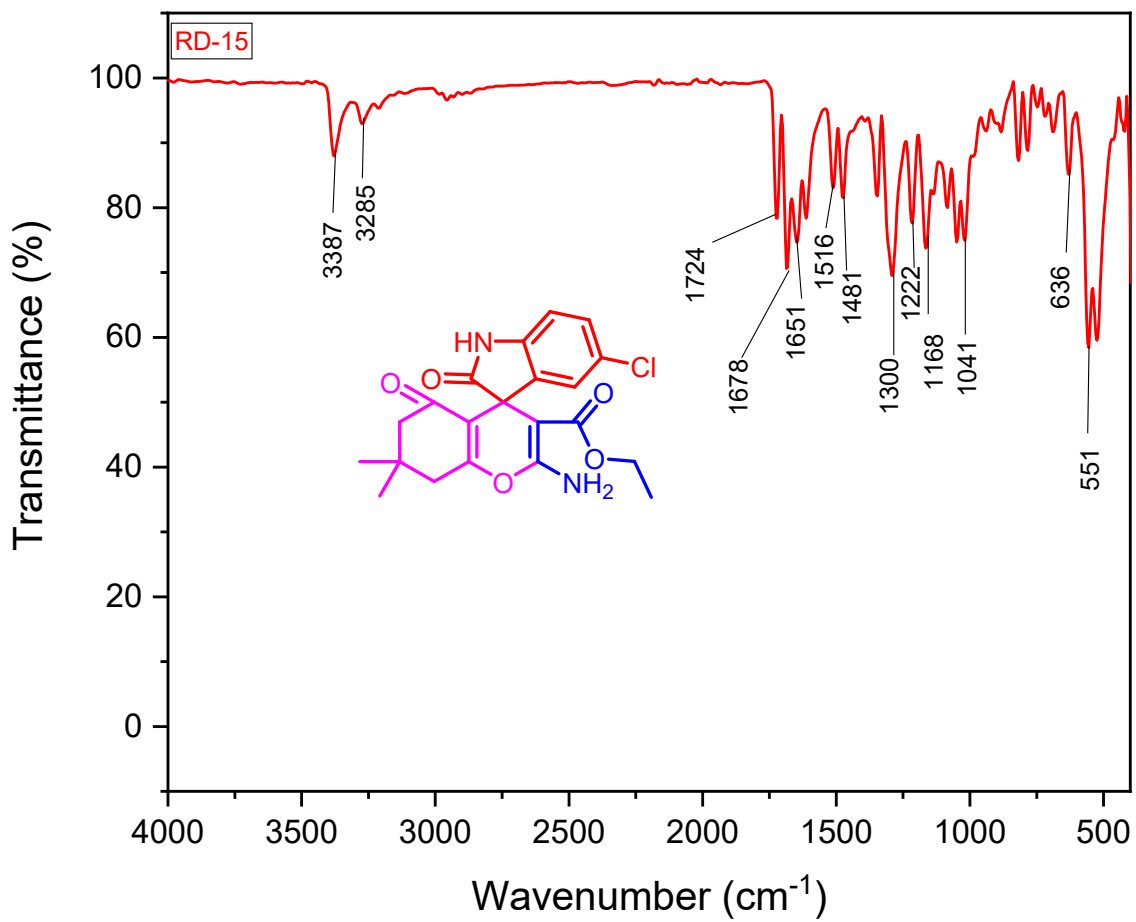

**Figure S35.** FT-IR spectrum of **9b**.

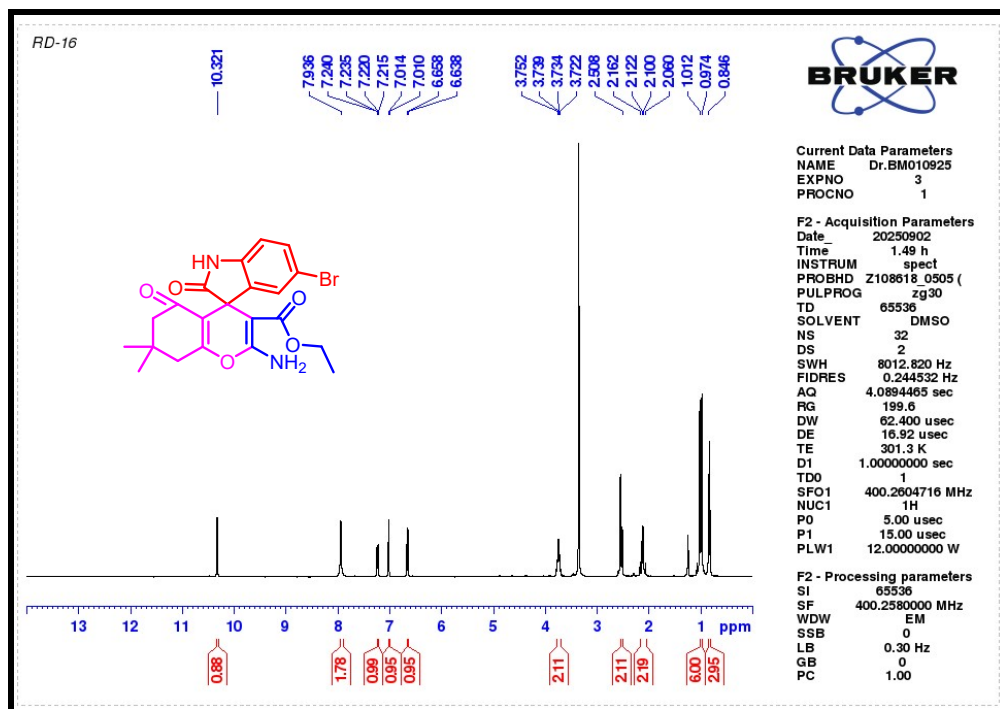

Figure S36.  $^1\text{H}$  NMR spectrum (400 MHz) of **9c** in  $\text{DMSO-d}_6$ .

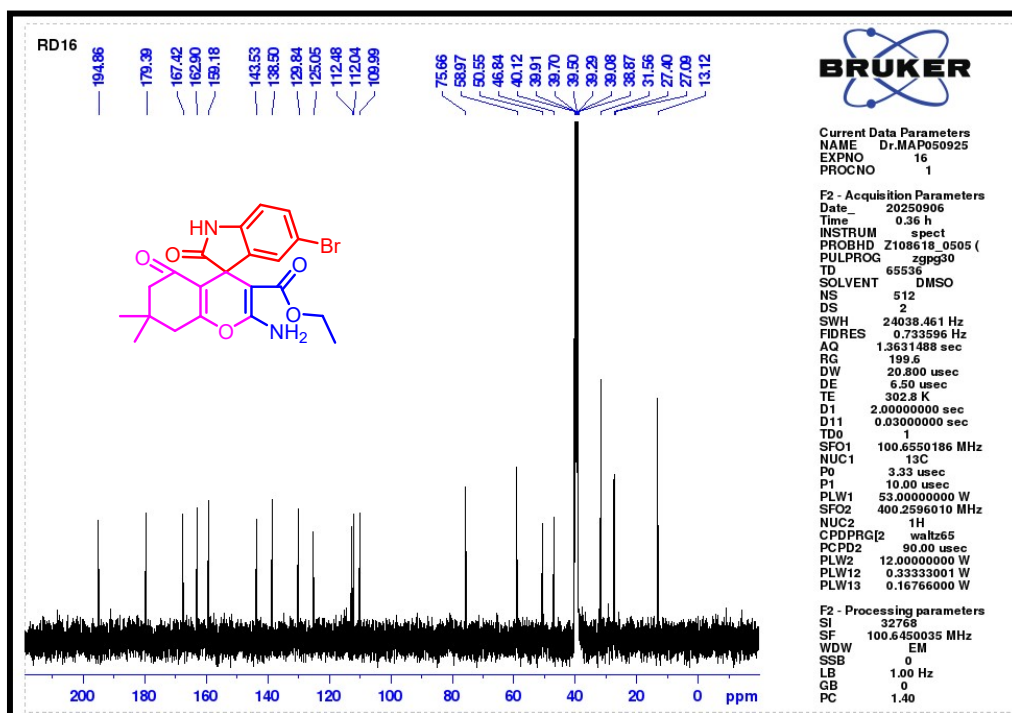

Figure S37.  $^{13}\text{C}$  NMR spectrum (100 MHz) of **9c** in  $\text{DMSO-d}_6$ .

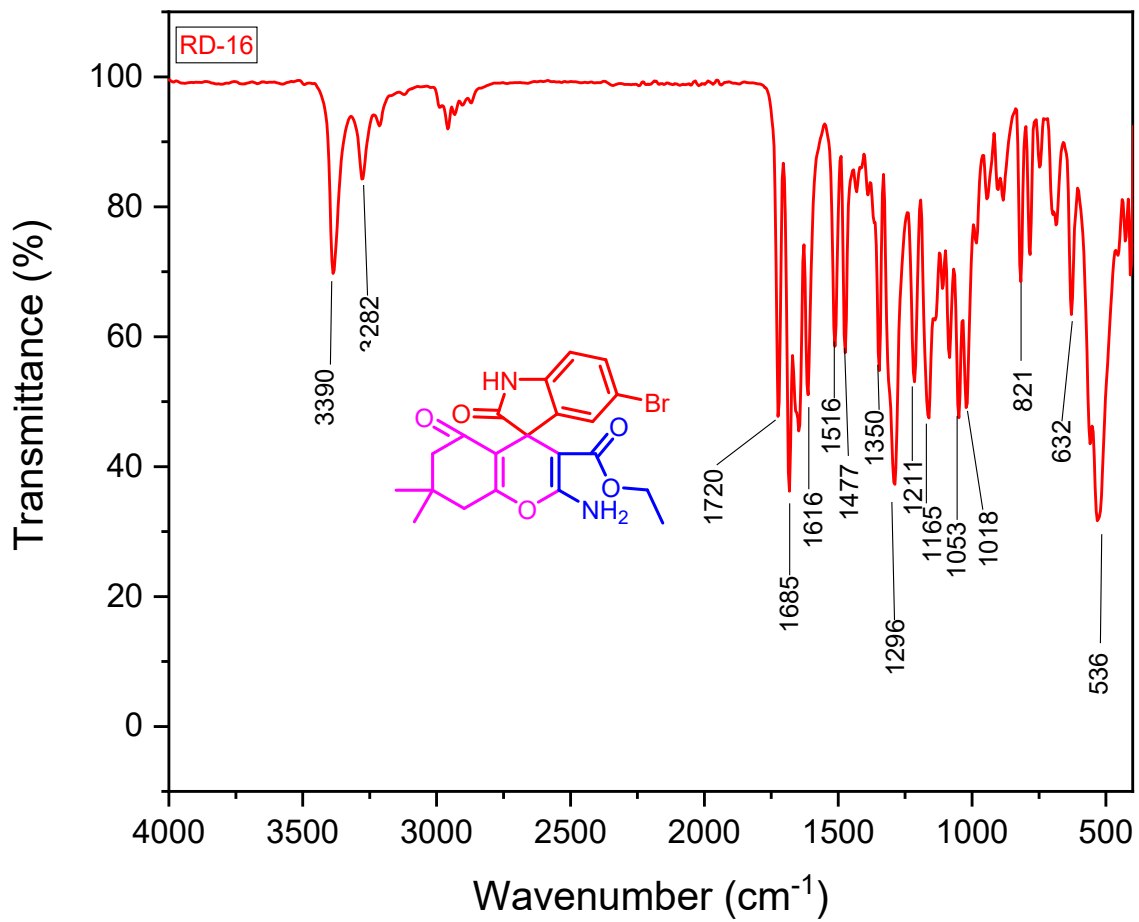

**Figure S38.** FT-IR spectrum of **9c**.

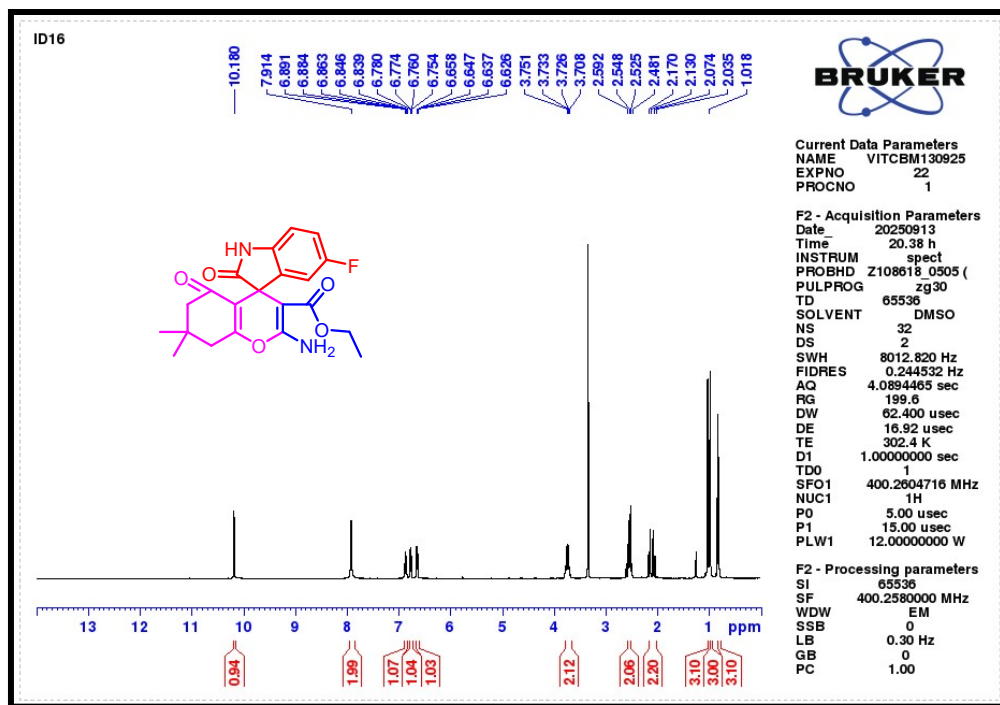

Figure S39.  $^1\text{H}$  NMR spectrum (400 MHz) of **9d** in  $\text{DMSO-d}_6$ .

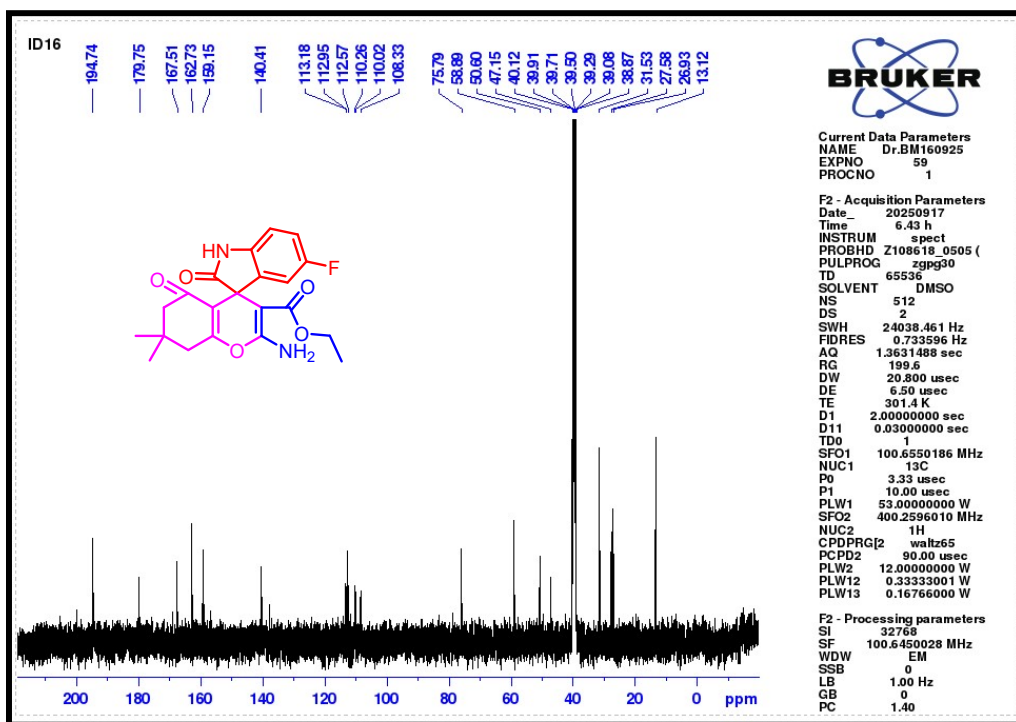

Figure S40.  $^{13}\text{C}$  NMR spectrum (100 MHz) of **9d** in  $\text{DMSO-d}_6$ .

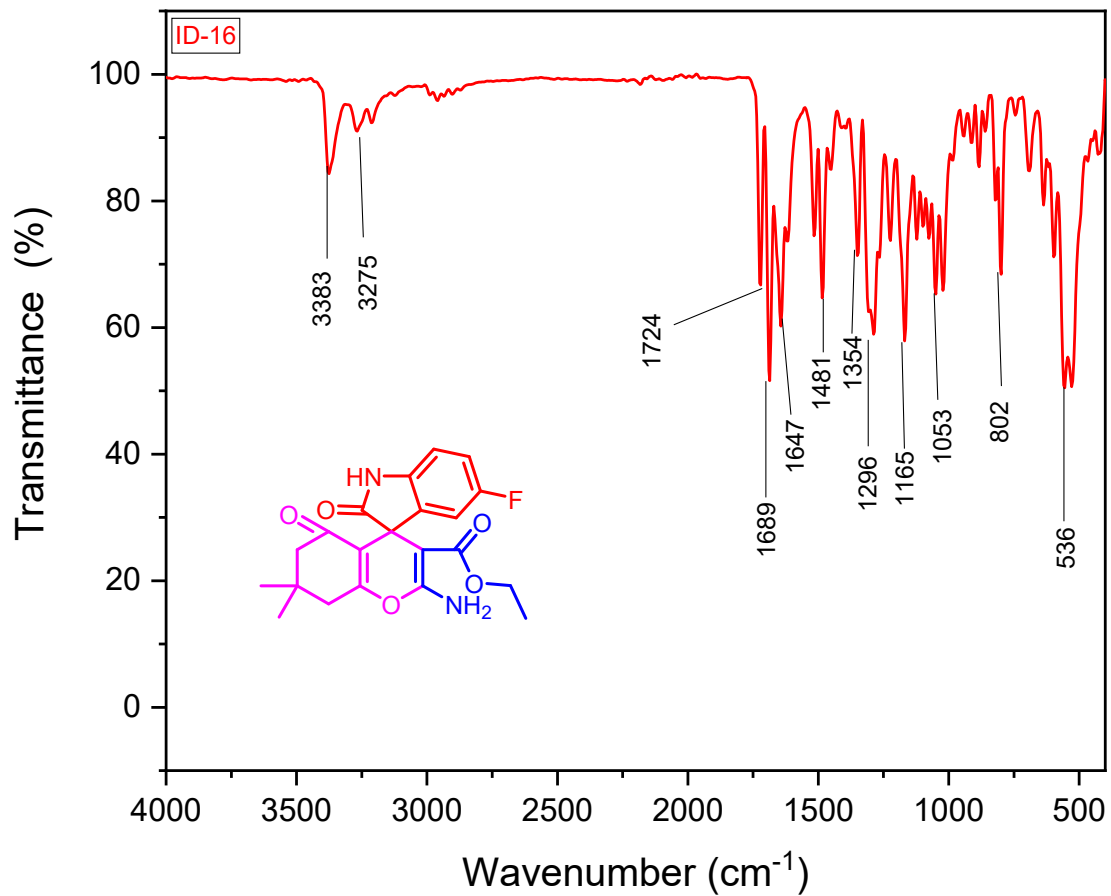

**Figure S41.** FT-IR spectrum of **9d**.

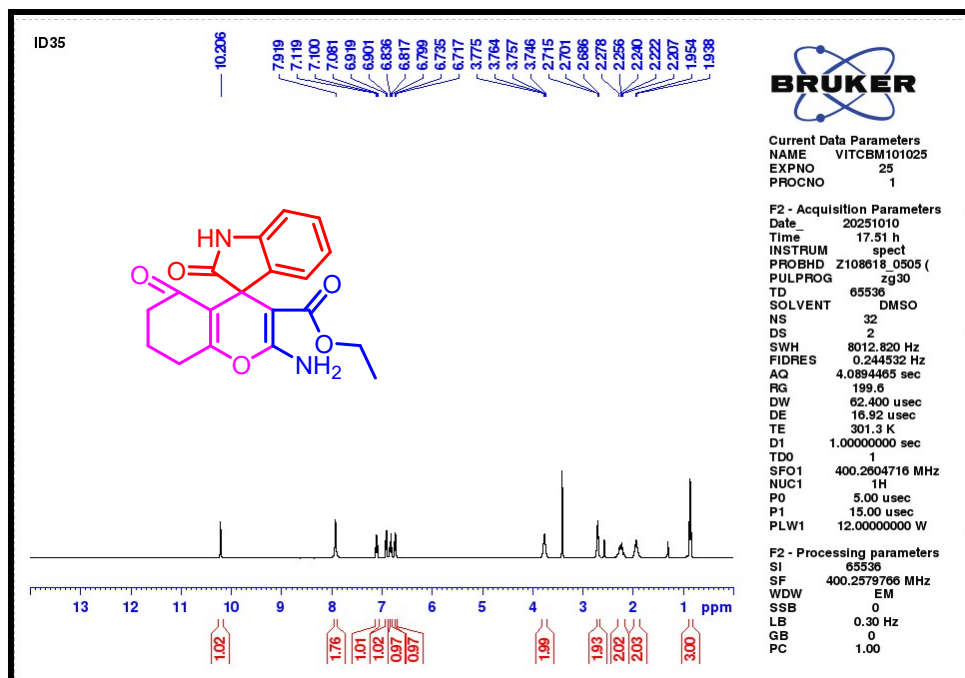

Figure S42.  $^1\text{H}$  NMR spectrum (400 MHz) of **9e** in  $\text{DMSO-d}_6$ .

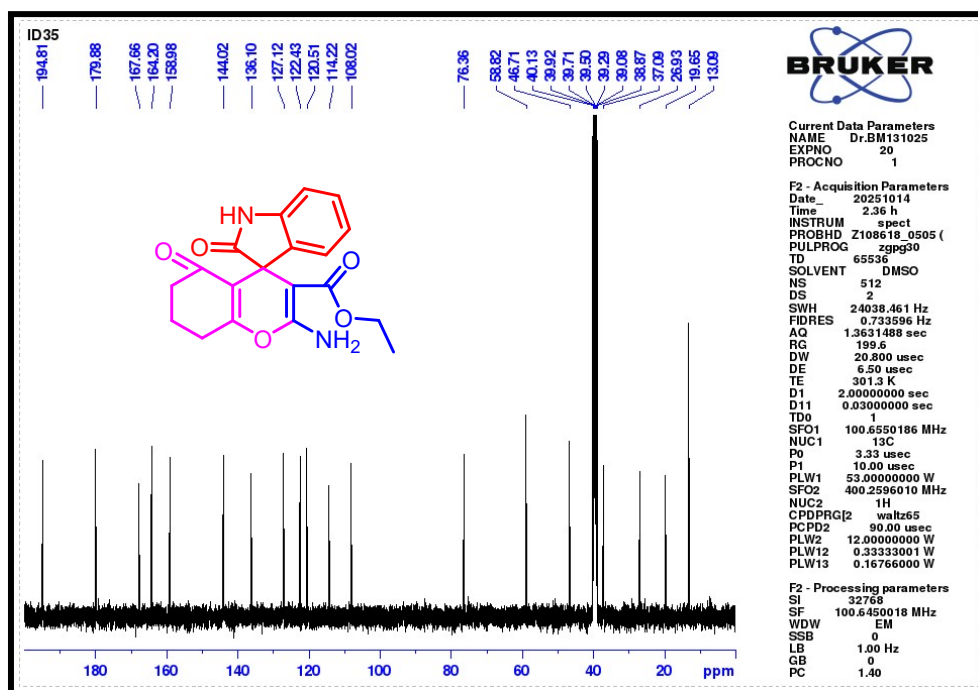

Figure S43.  $^{13}\text{C}$  NMR spectrum (100 MHz) of **9e** in  $\text{DMSO-d}_6$ .

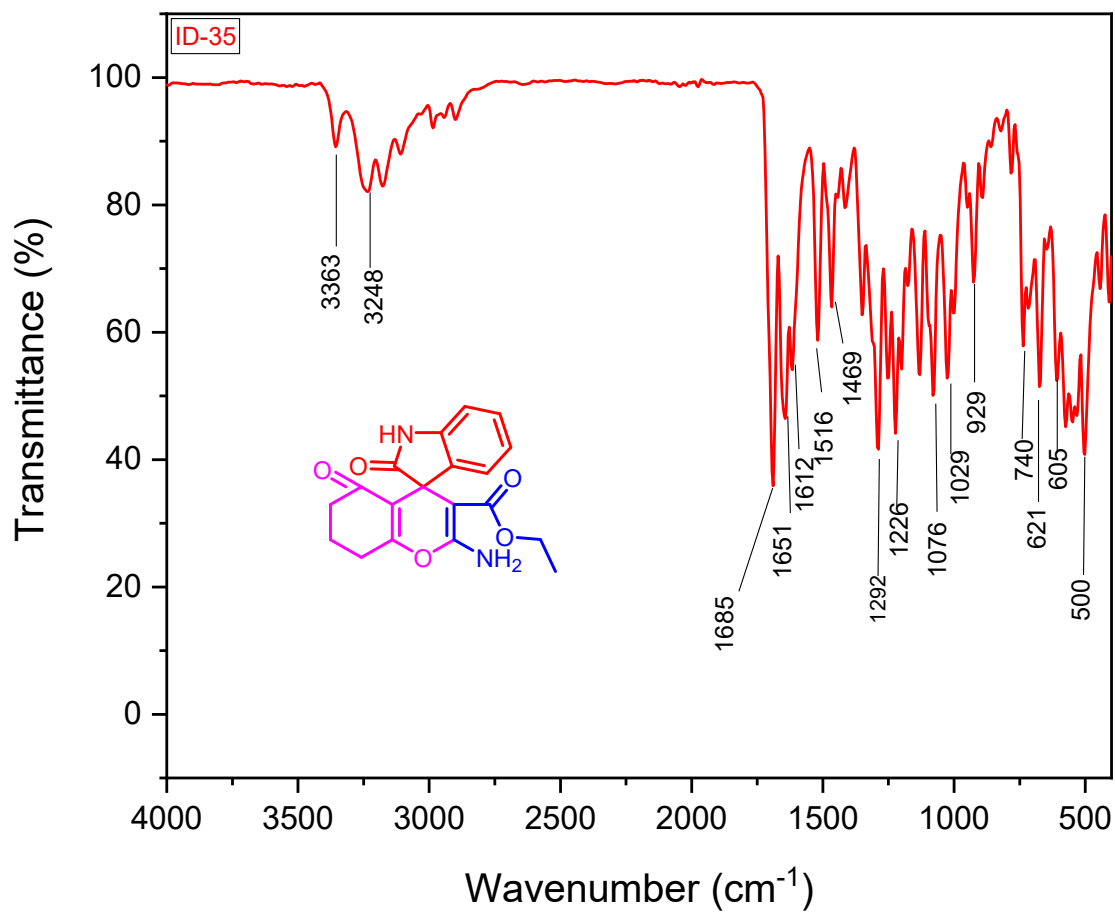

**Figure S44.** FT-IR spectrum of **9e**.

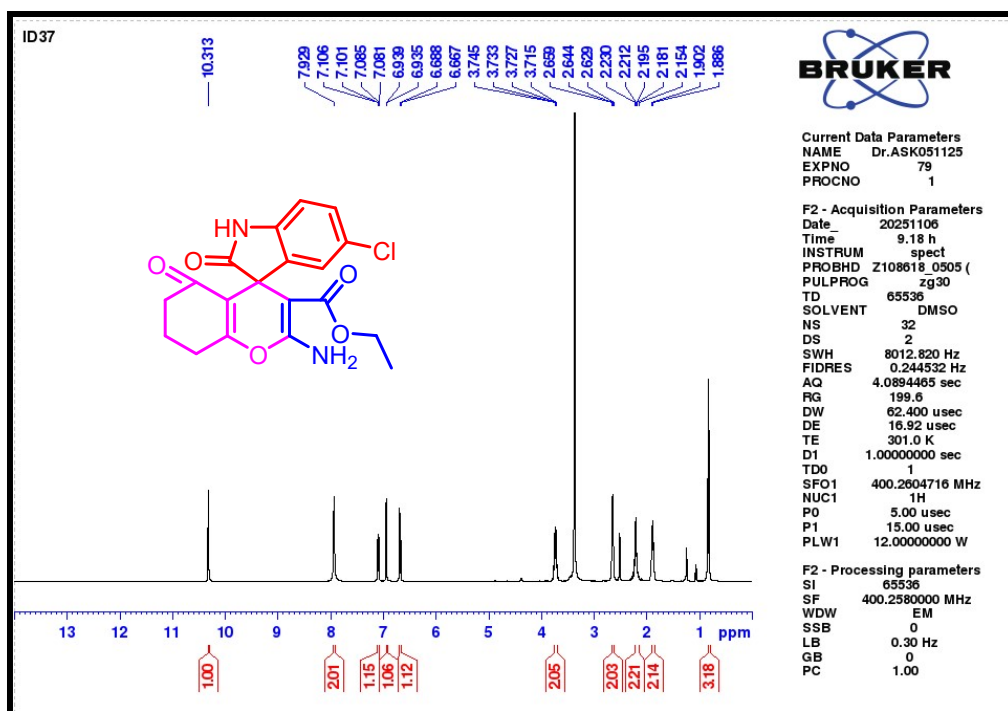

Figure S45.  $^1\text{H}$  NMR spectrum (400 MHz) of **9f** in  $\text{DMSO-d}_6$ .

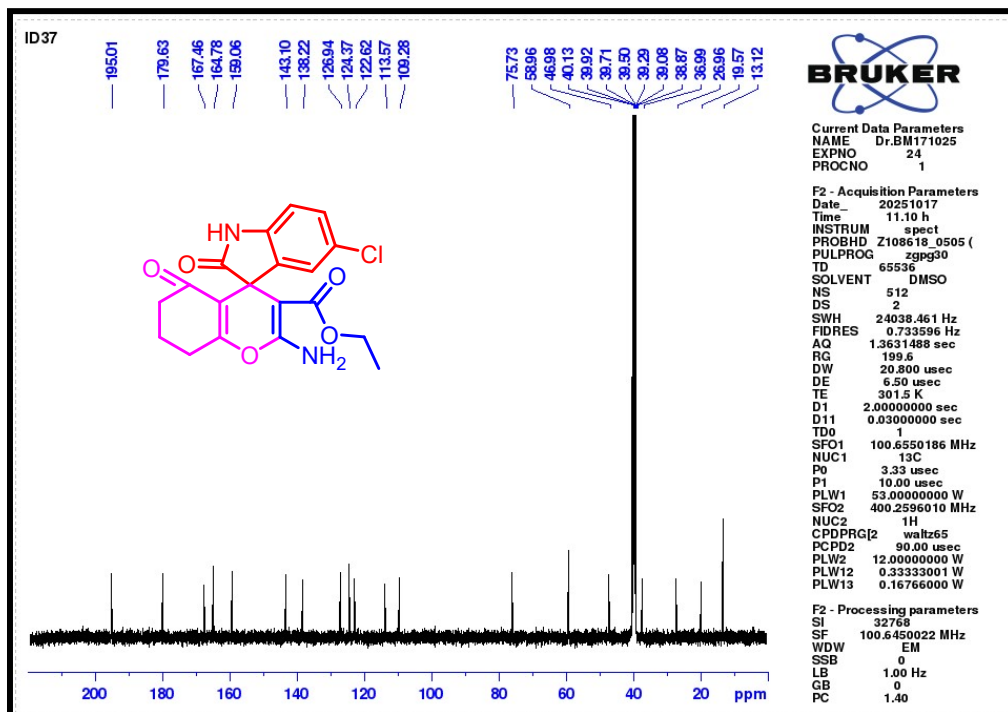

Figure S46.  $^{13}\text{C}$  NMR spectrum (100 MHz) of **9f** in  $\text{DMSO-d}_6$ .

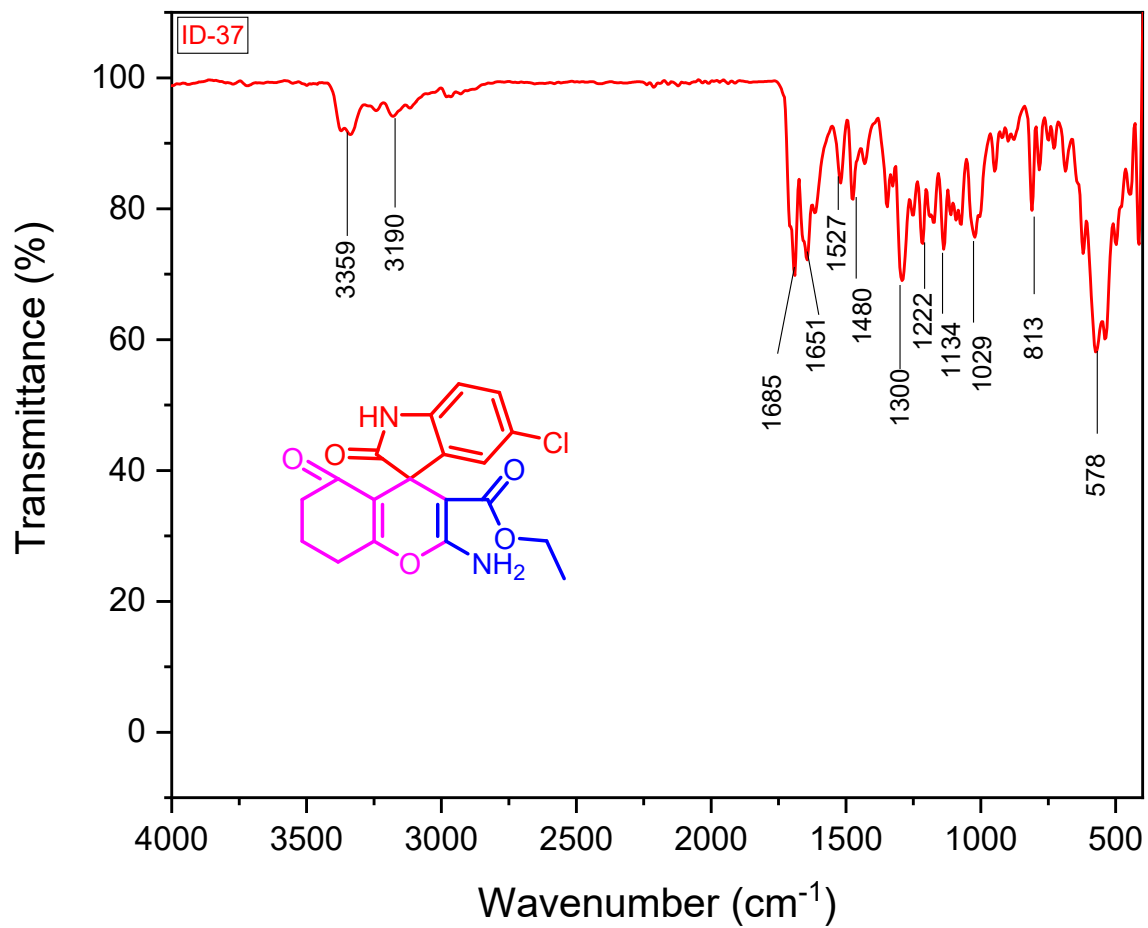

**Figure S47.** FT-IR spectrum of **9f**.

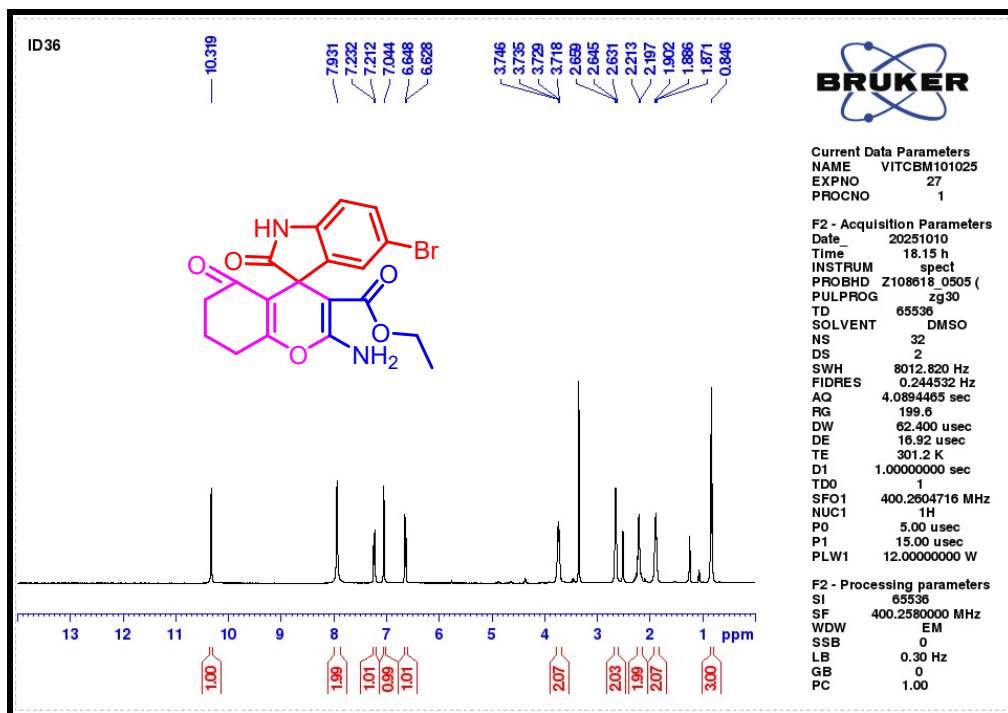

Figure S48. <sup>1</sup>H NMR spectrum (400 MHz) of **9g** in DMSO-d<sub>6</sub>.

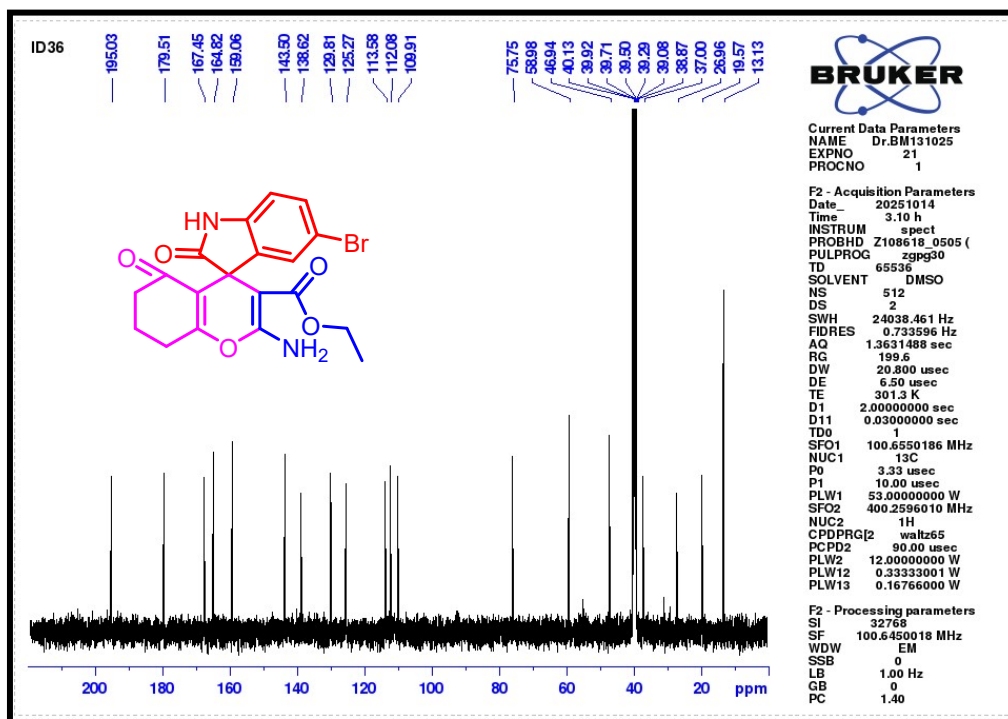

Figure S49. <sup>13</sup>C NMR spectrum (100 MHz) of **9g** in DMSO-d<sub>6</sub>.

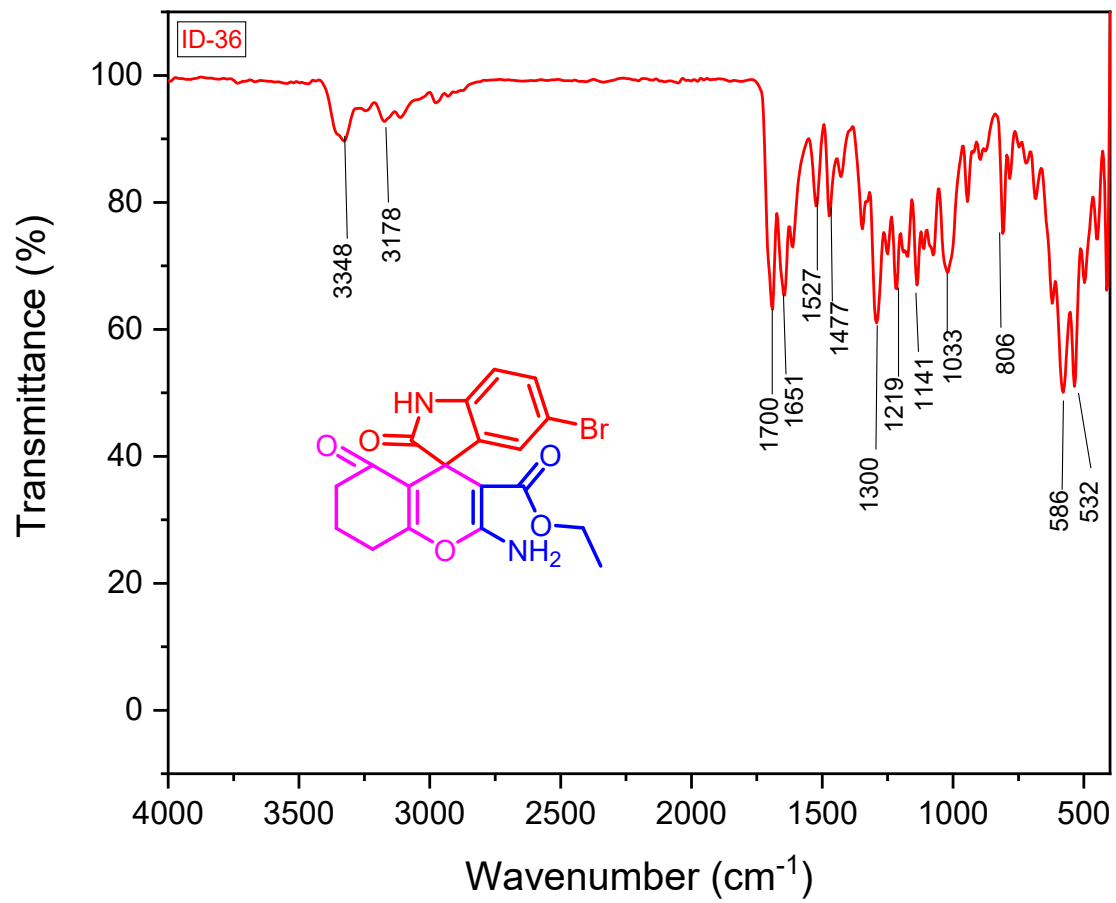

Figure S50. FT-IR spectrum of **9g**.

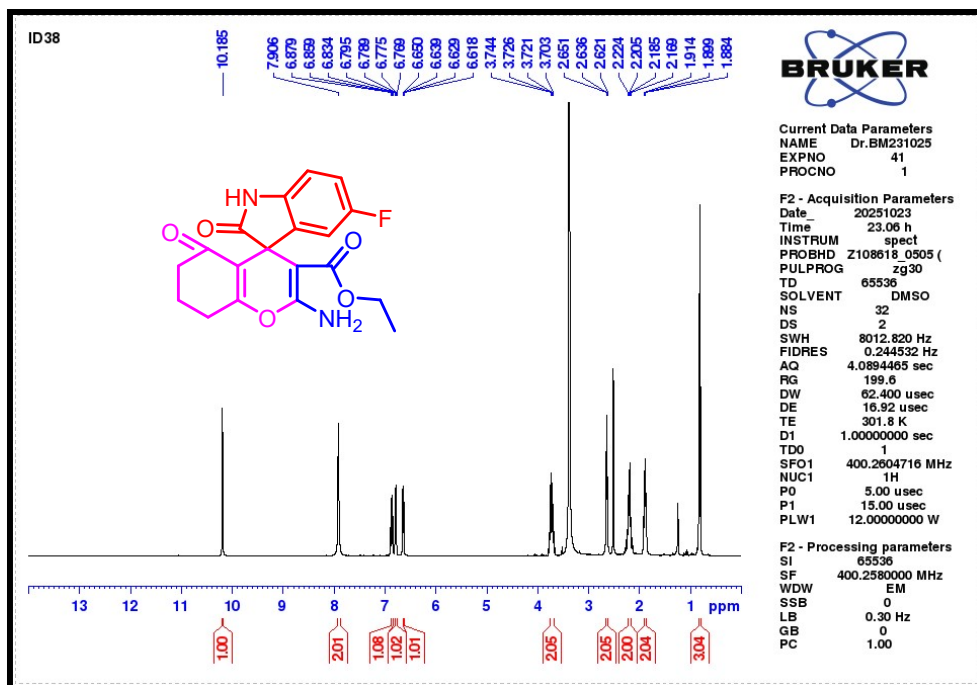

Figure S51.  $^1\text{H}$  NMR spectrum (400 MHz) of 9h in DMSO- $d_6$ .

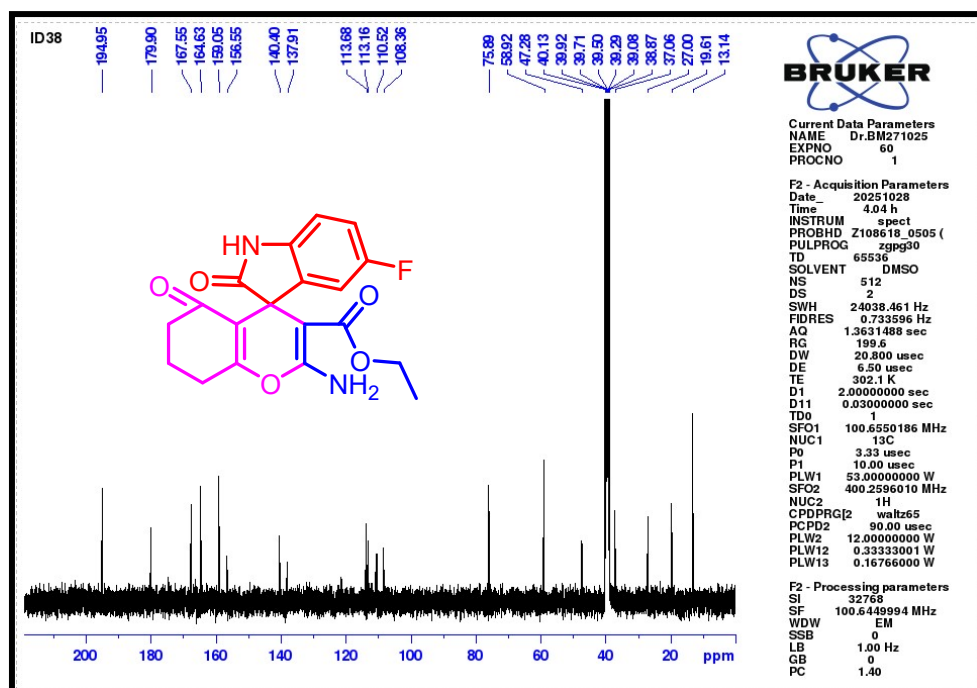

Figure S52.  $^{13}\text{C}$  NMR spectrum (100 MHz) of 9h in DMSO- $d_6$ .

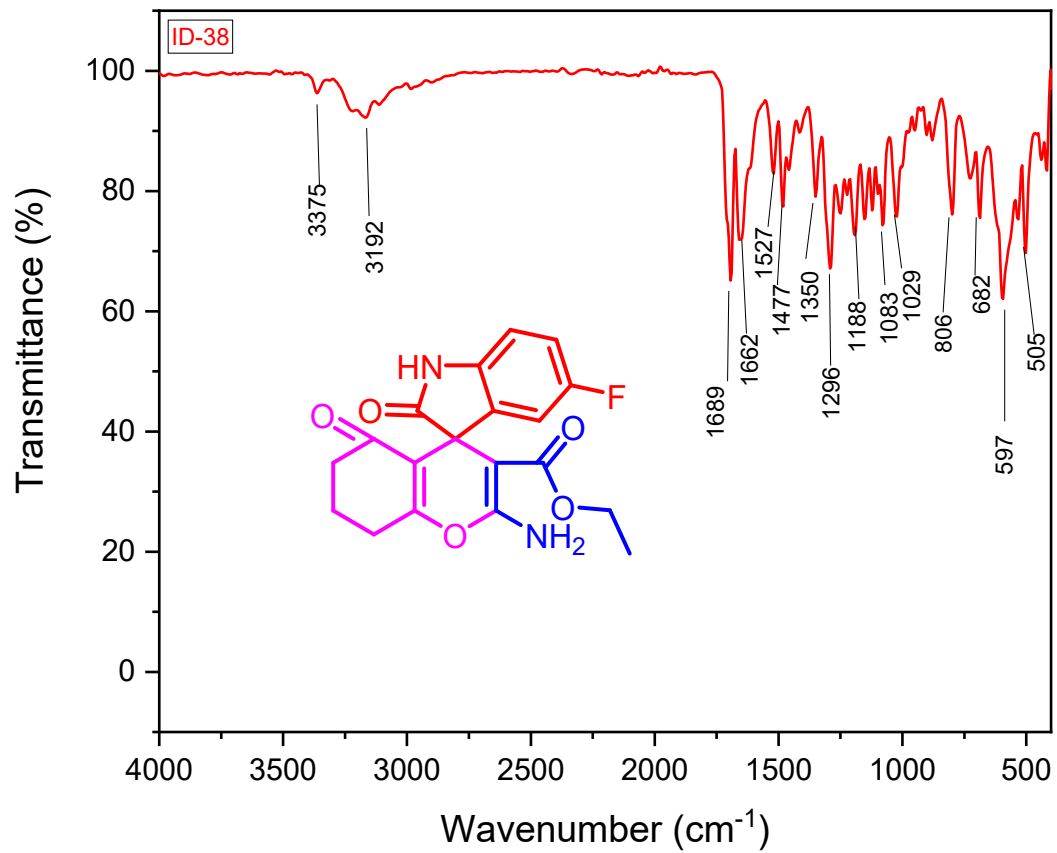

**Figure S53.** FT-IR spectrum of **9h**.

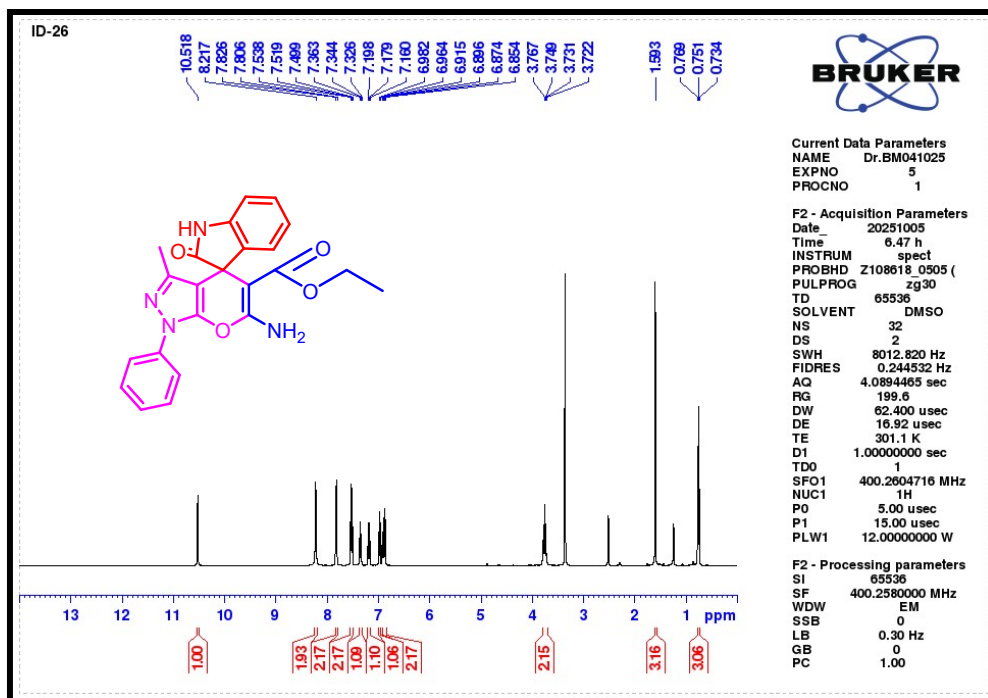

Figure S54.  $^1\text{H}$  NMR spectrum (400 MHz) of **9i** in  $\text{DMSO-d}_6$ .

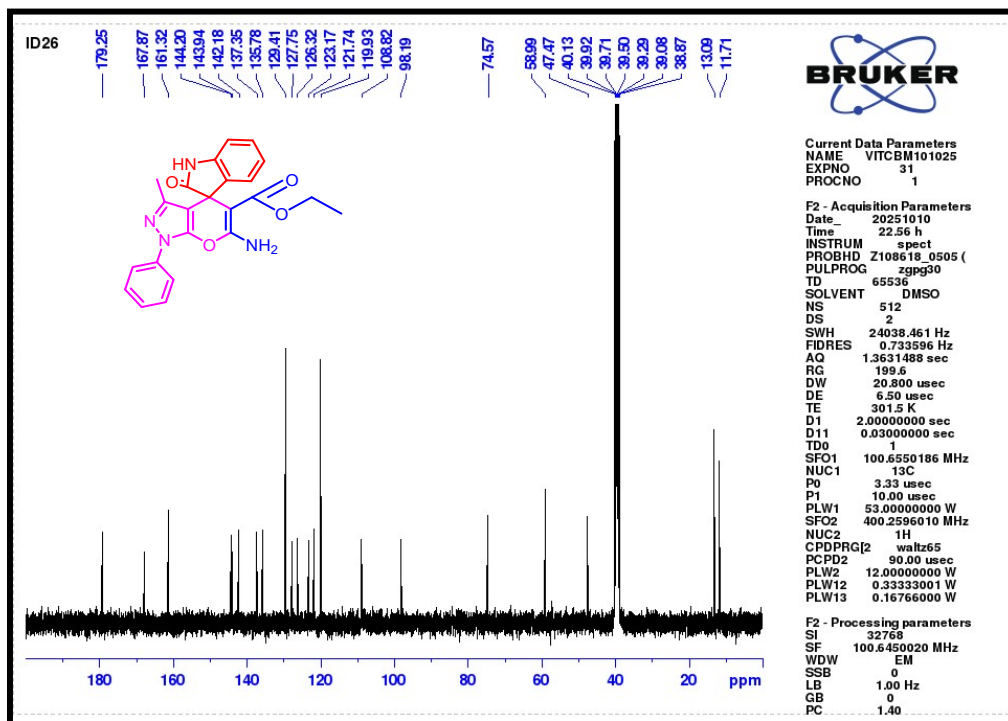

Figure S55.  $^{13}\text{C}$  NMR spectrum (100 MHz) of **9i** in  $\text{DMSO-d}_6$ .

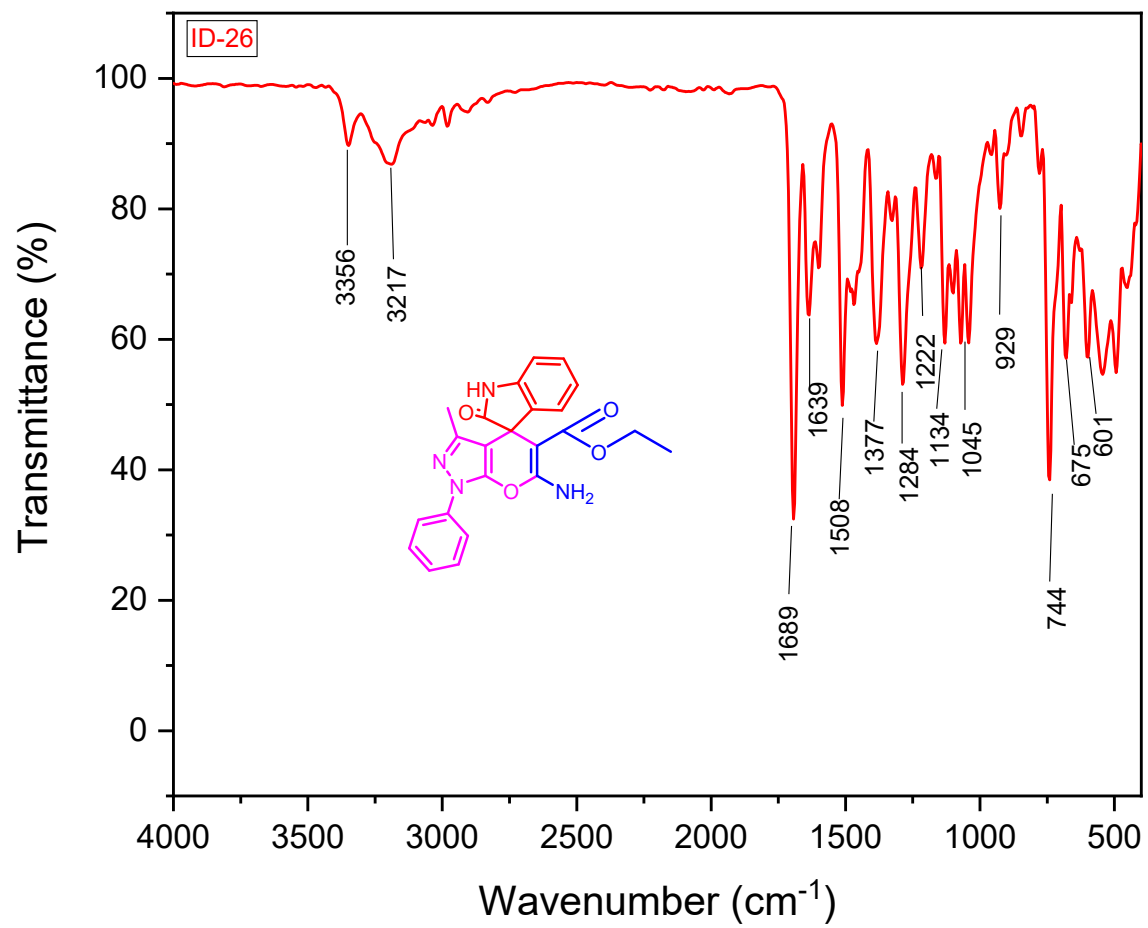

**Figure S56.** FT-IR spectrum of **9i**.

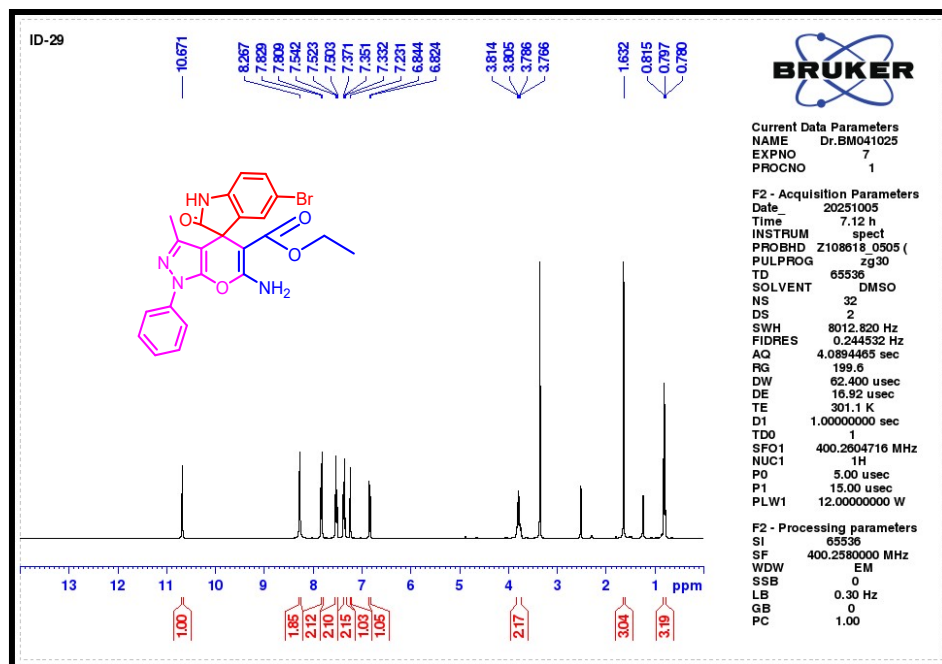

Figure S57.  $^1\text{H}$  NMR spectrum (400 MHz) of 9j in DMSO- $d_6$ .

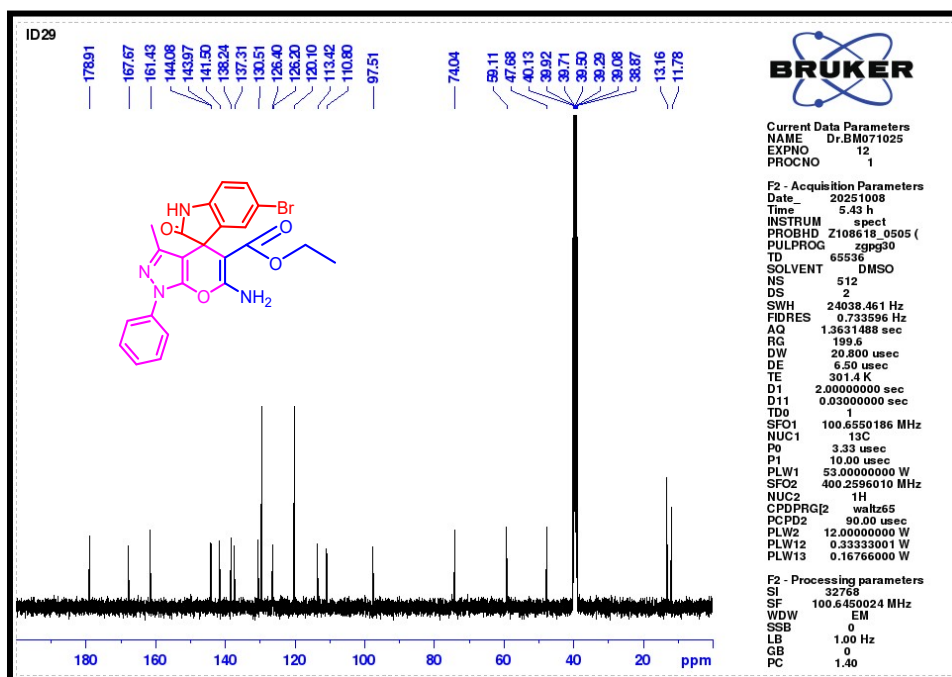

Figure S58.  $^{13}\text{C}$  NMR spectrum (100 MHz) of 9j in DMSO- $d_6$ .

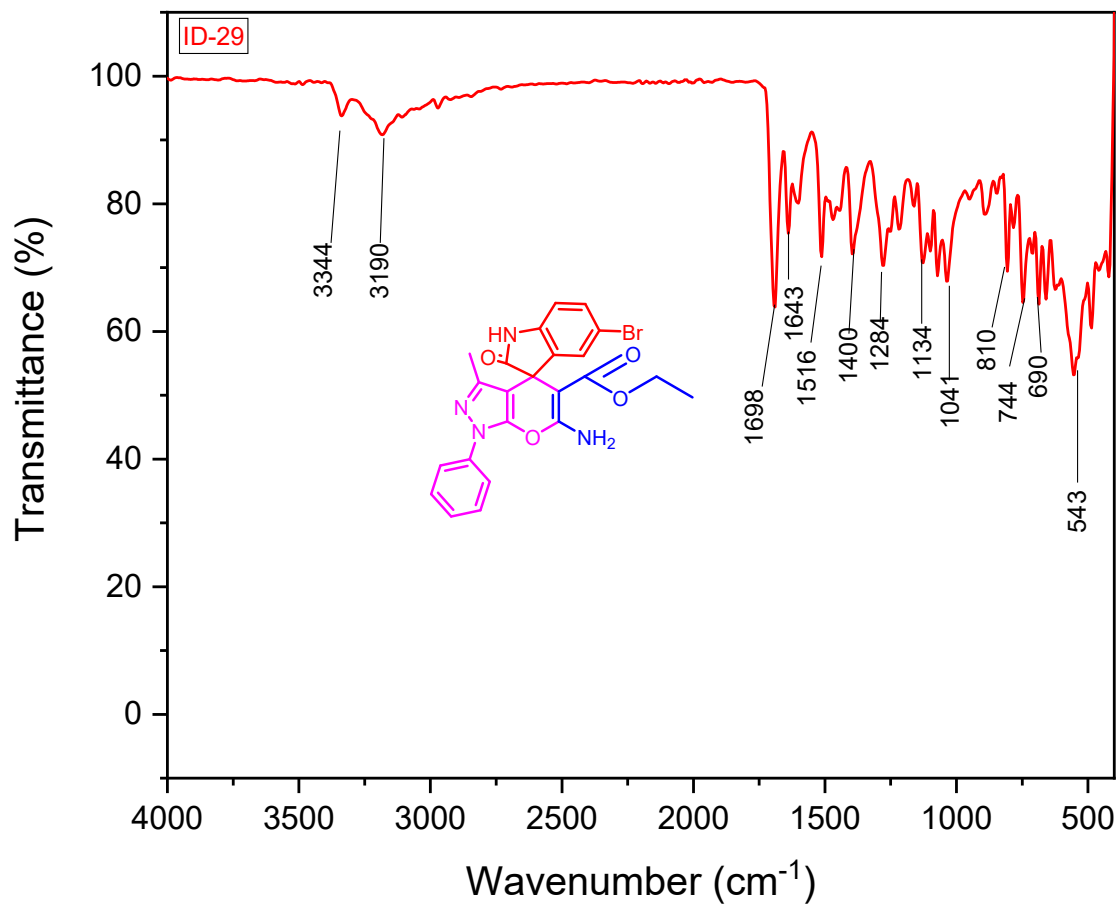

Figure S59. FT-IR spectrum of 9j.

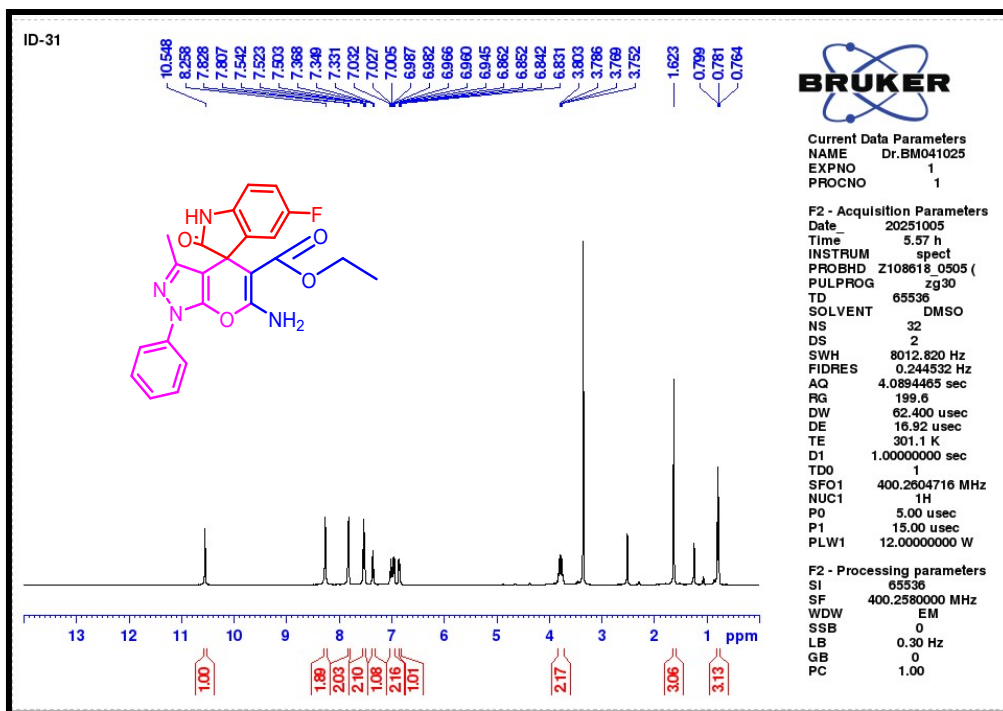

Figure S60.  $^1\text{H}$  NMR spectrum (400 MHz) of **9k** in  $\text{DMSO-d}_6$ .

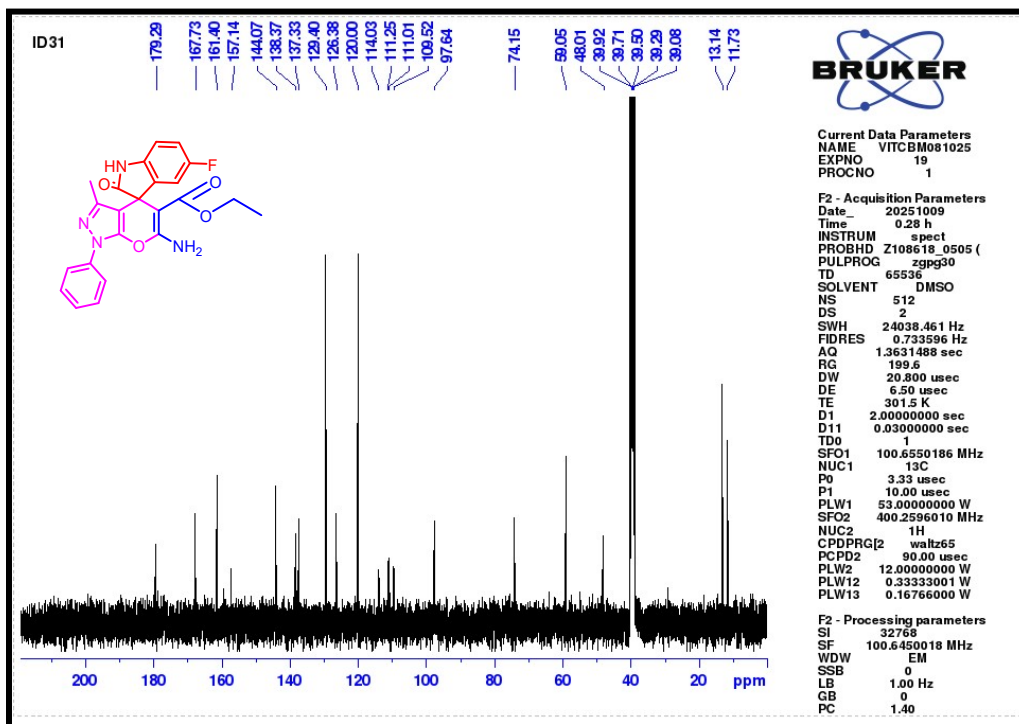

Figure S61.  $^{13}\text{C}$  NMR spectrum (100 MHz) of **9k** in  $\text{DMSO-d}_6$ .

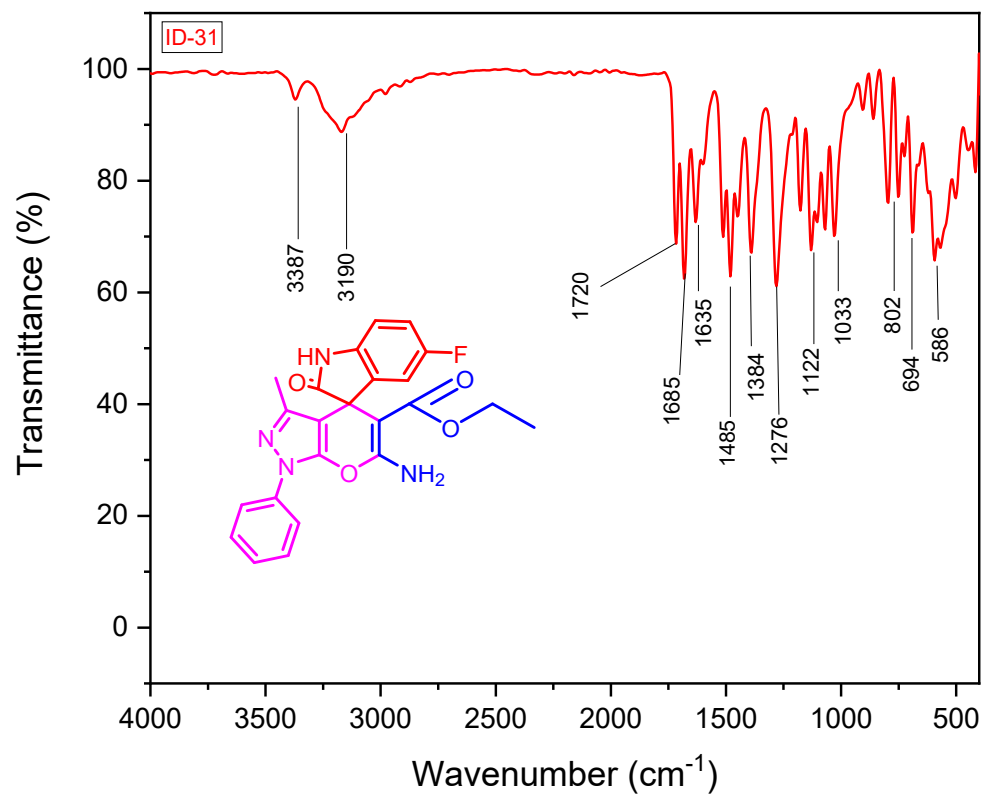

**Figure S62.** FT-IR spectrum of **9k**.

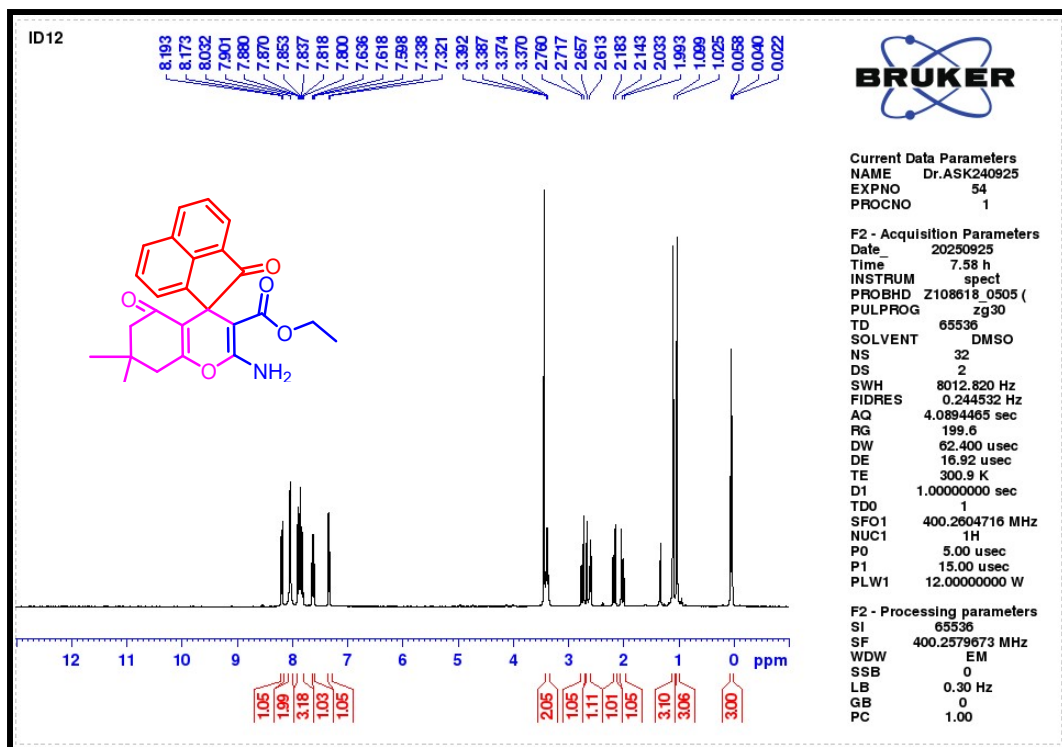

Figure S63.  $^1\text{H}$  NMR spectrum (400 MHz) of **91** in DMSO- $d_6$ .

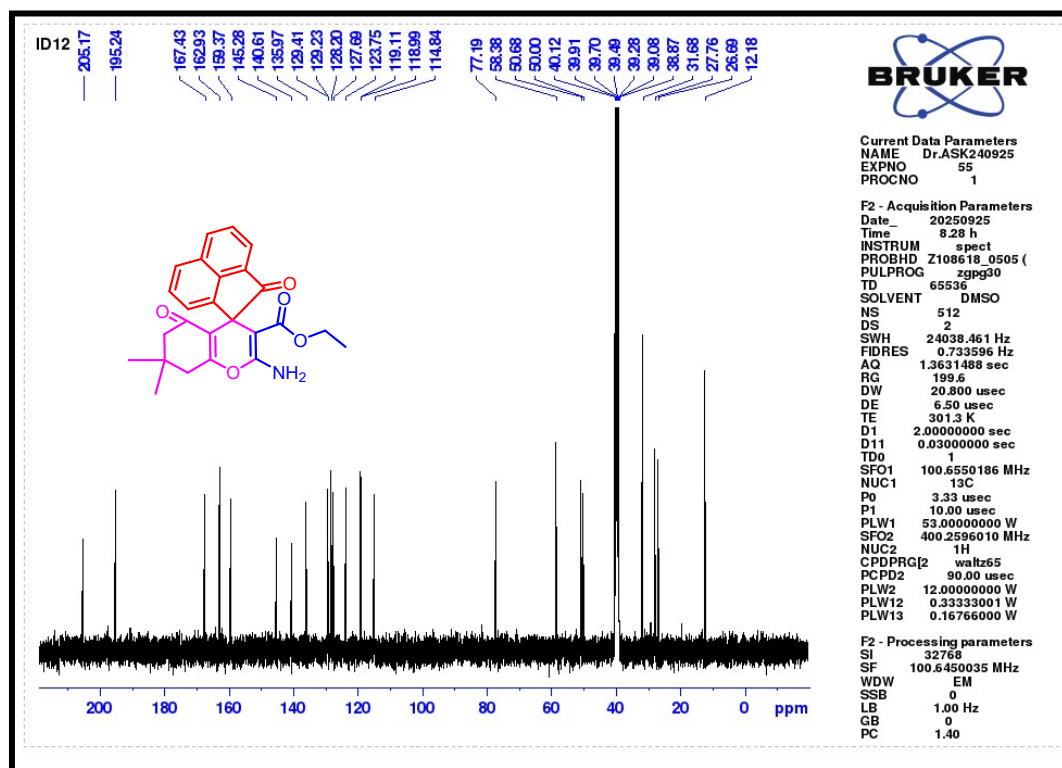

Figure S64.  $^{13}\text{C}$  NMR spectrum (100 MHz) of **91** in DMSO- $d_6$ .

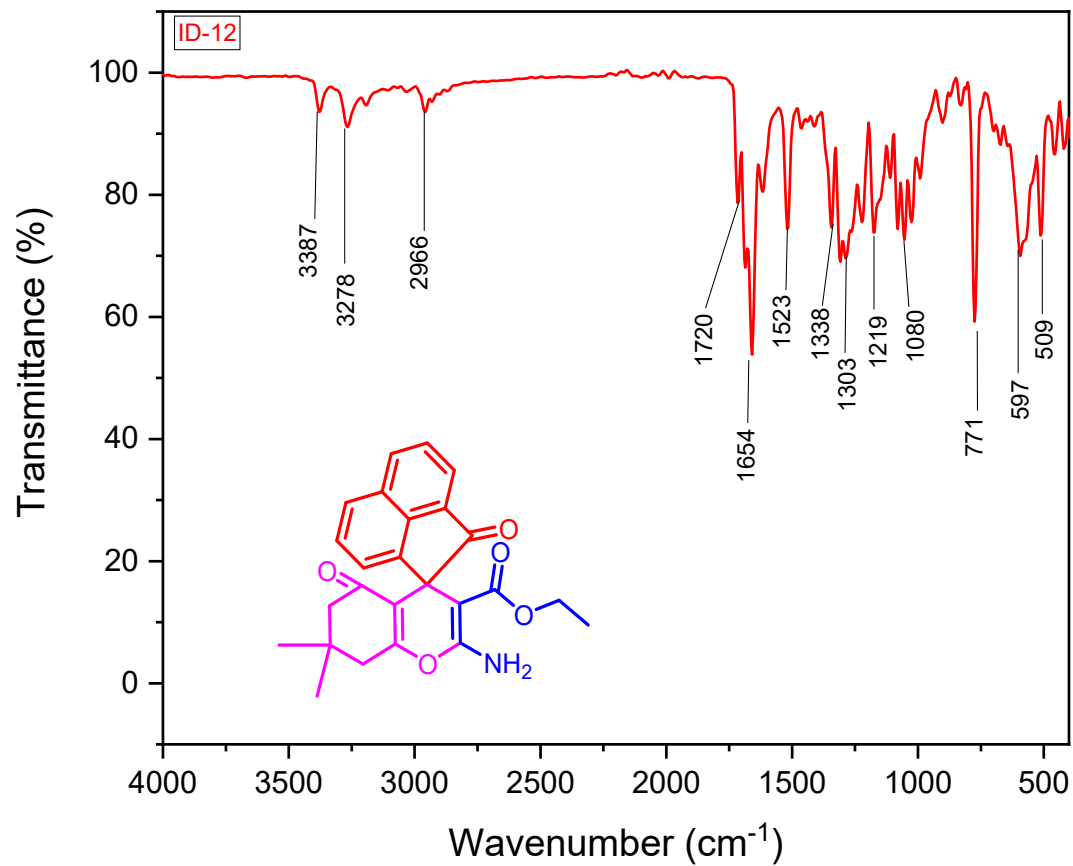

**Figure S65.** FT-IR spectrum of **9l**.

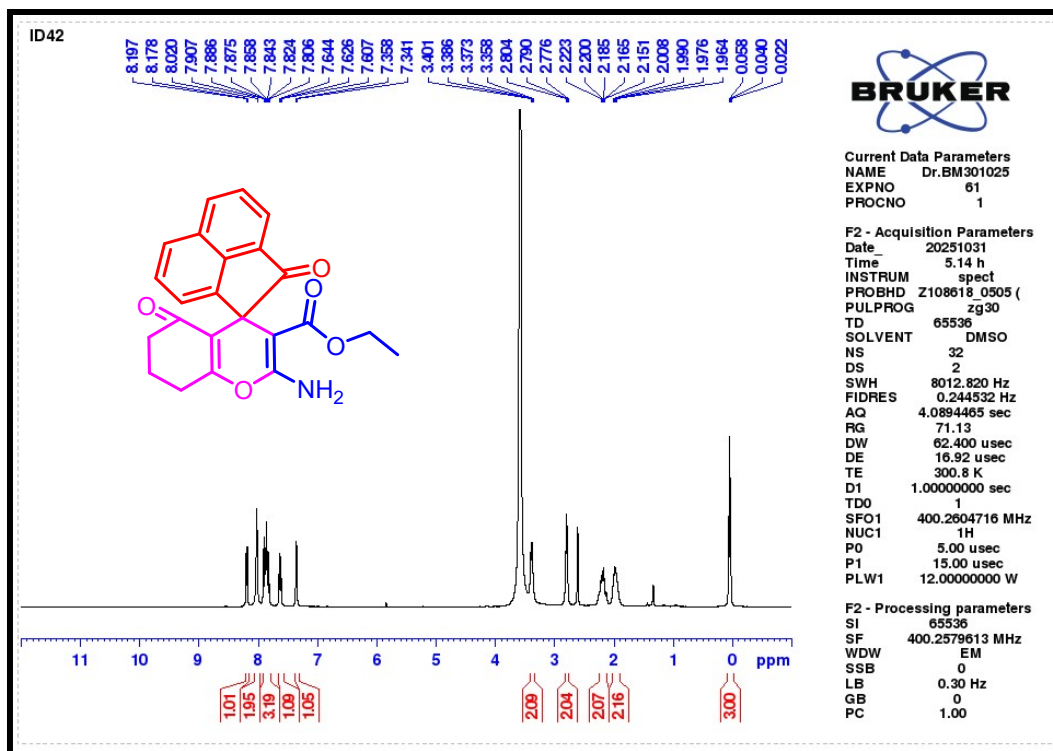

Figure S66.  $^1\text{H}$  NMR spectrum (400 MHz) of **9m** in  $\text{DMSO-d}_6$ .

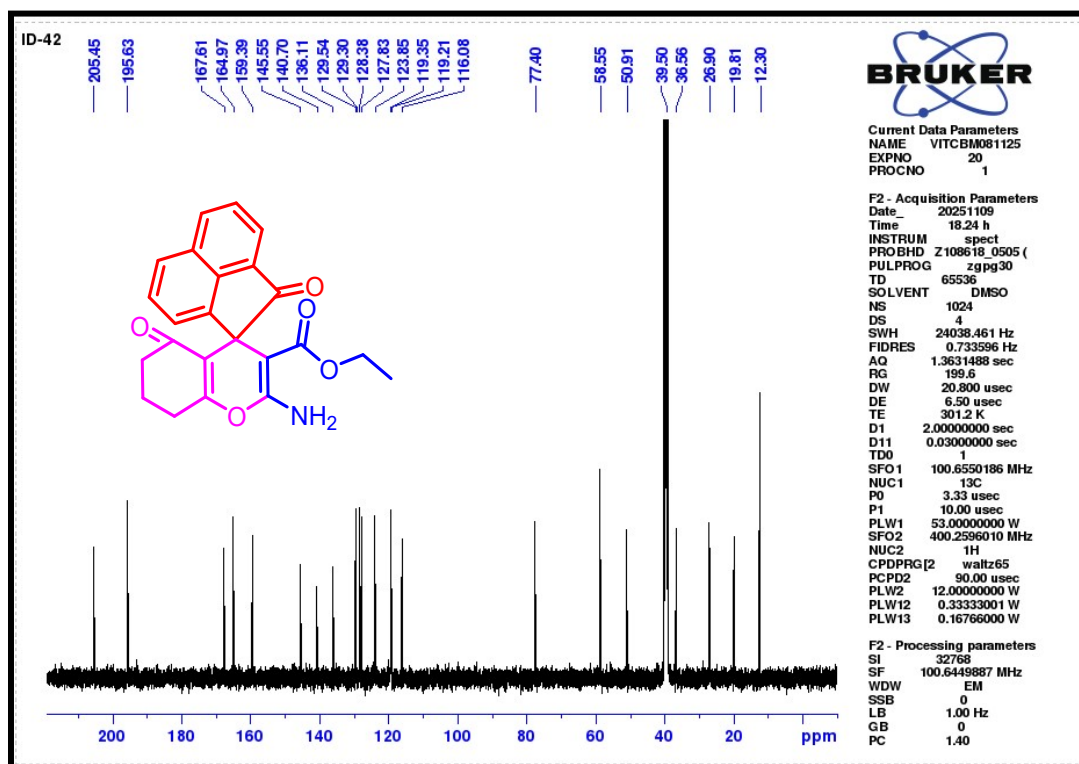

Figure S67.  $^{13}\text{C}$  NMR spectrum (100 MHz) of **9m** in  $\text{DMSO-d}_6$ .

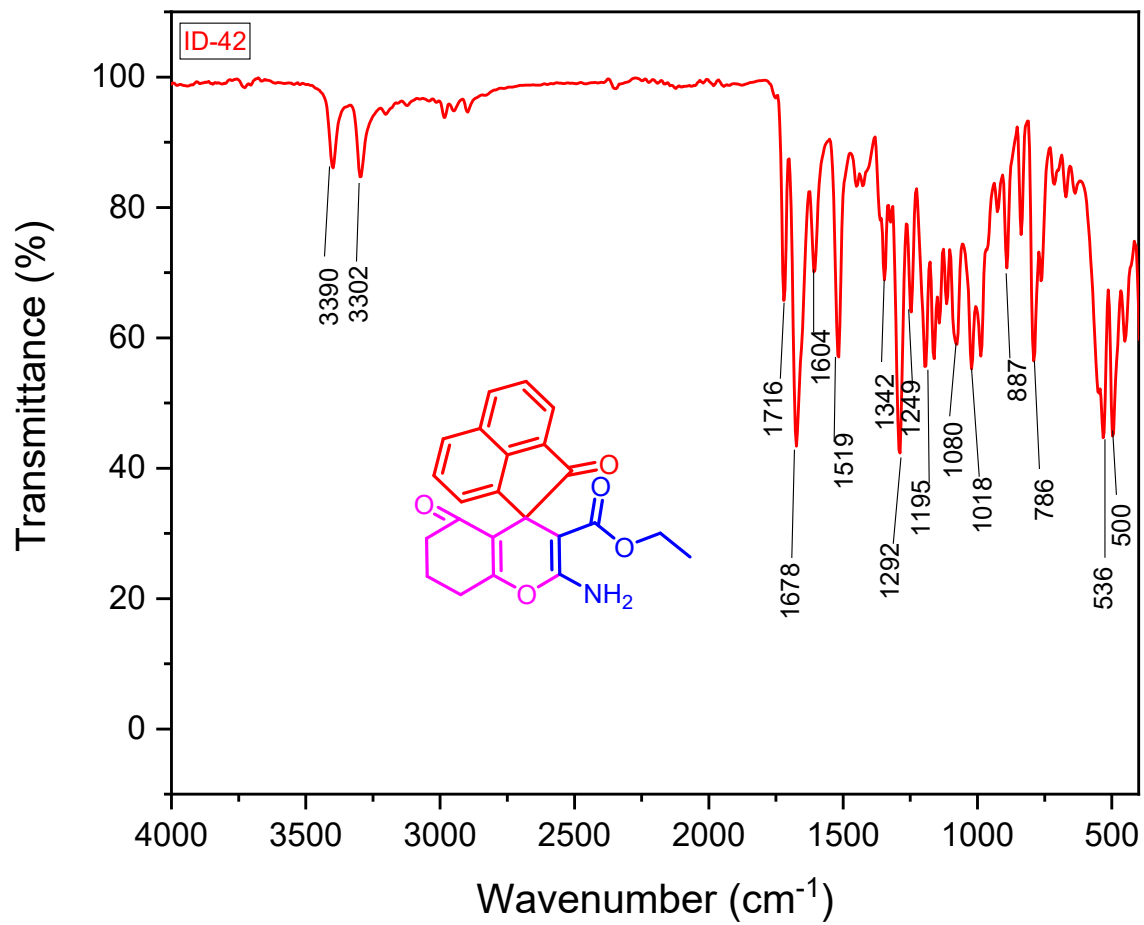

Figure S68. FT-IR spectrum of **9m**.

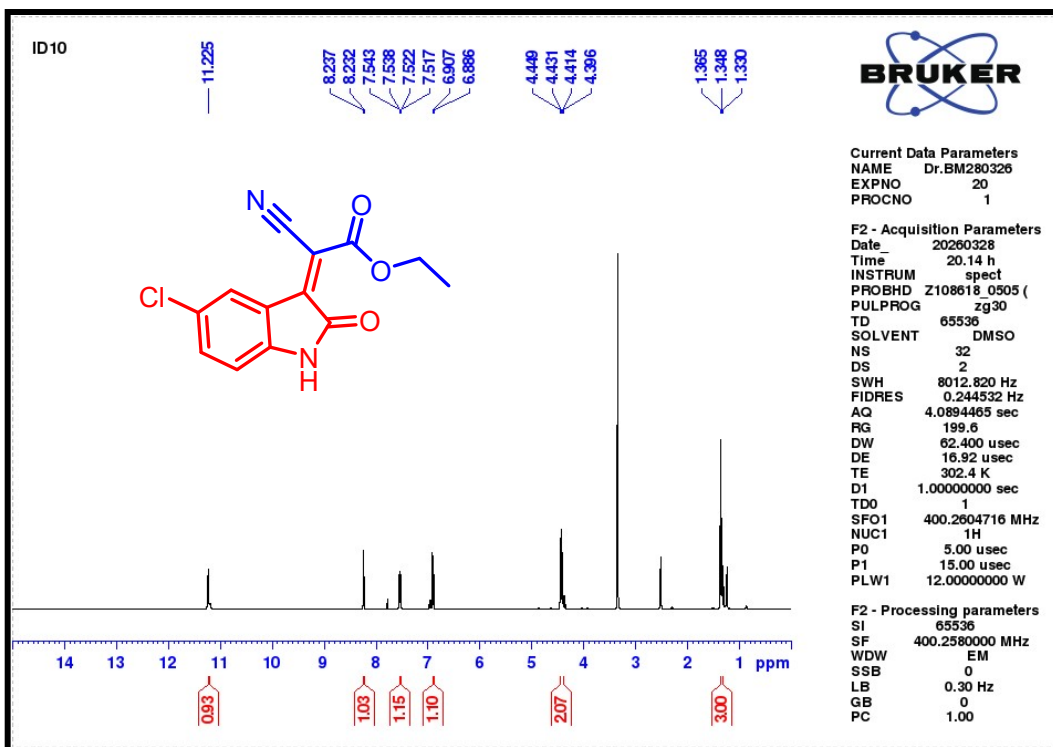

Figure S69.  $^1\text{H}$  NMR spectrum (400 MHz) of intermediate C in  $\text{DMSO-d}_6$ .

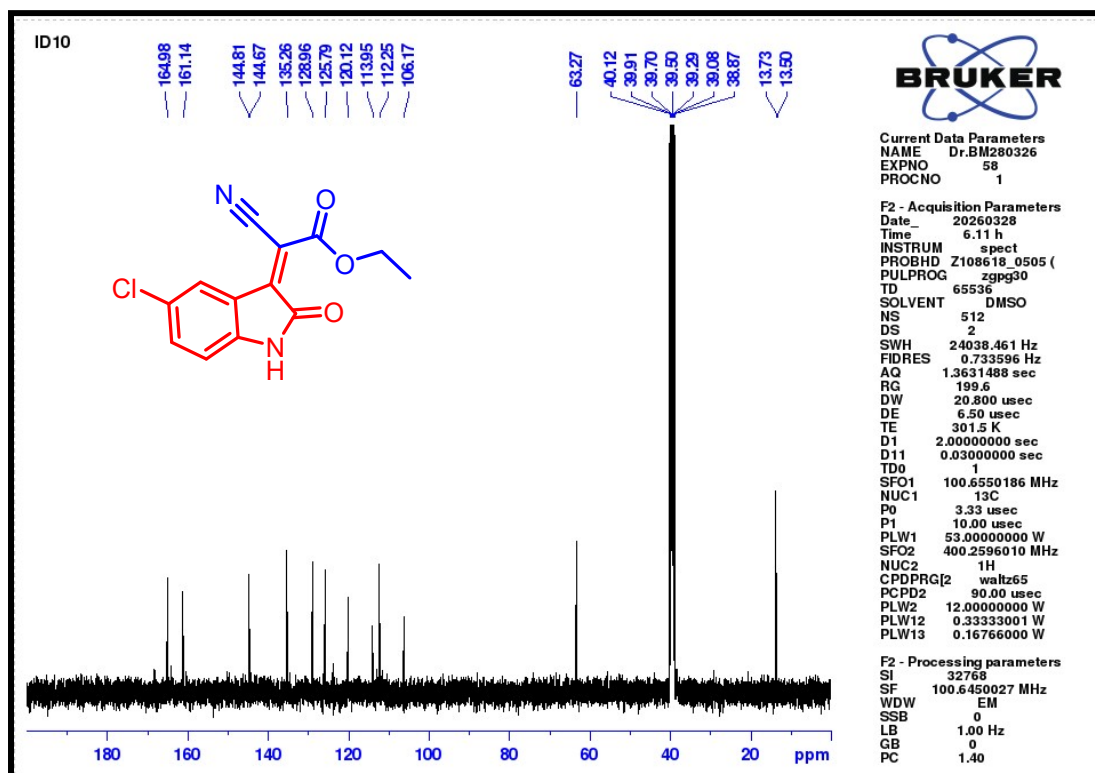

Figure S70.  $^{13}\text{C}$  NMR spectrum (100 MHz) of intermediate C in  $\text{DMSO-d}_6$ .

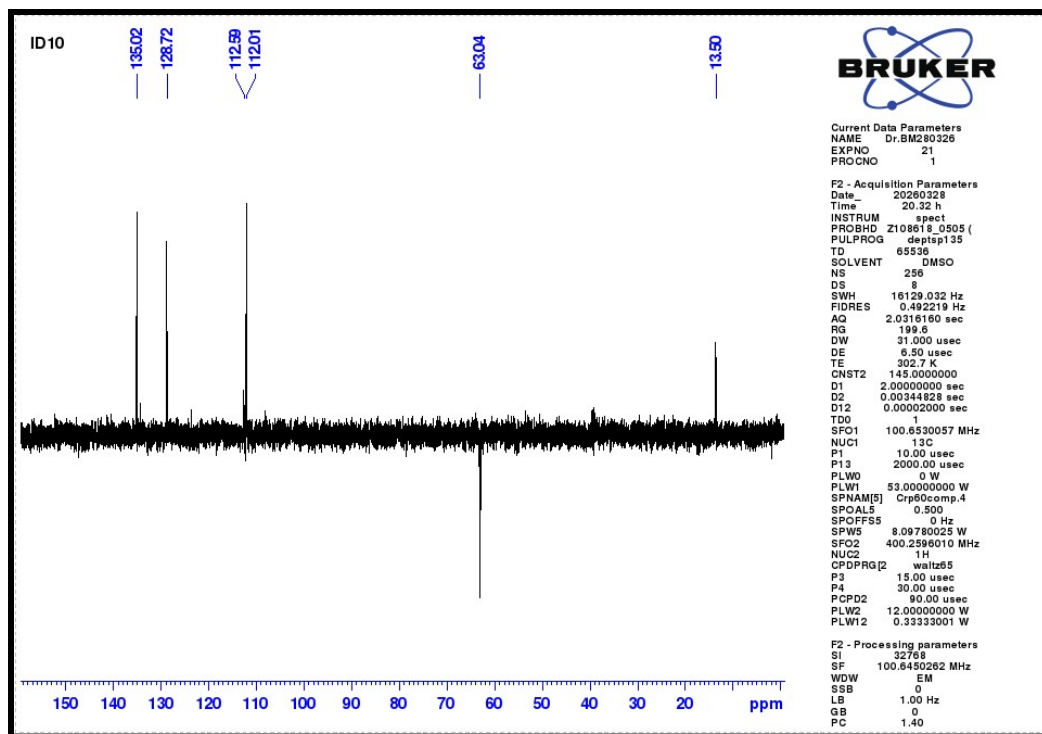

Figure S71. DEPT-135 spectrum (100 MHz) of **intermediate C** in DMSO-d<sub>6</sub>.

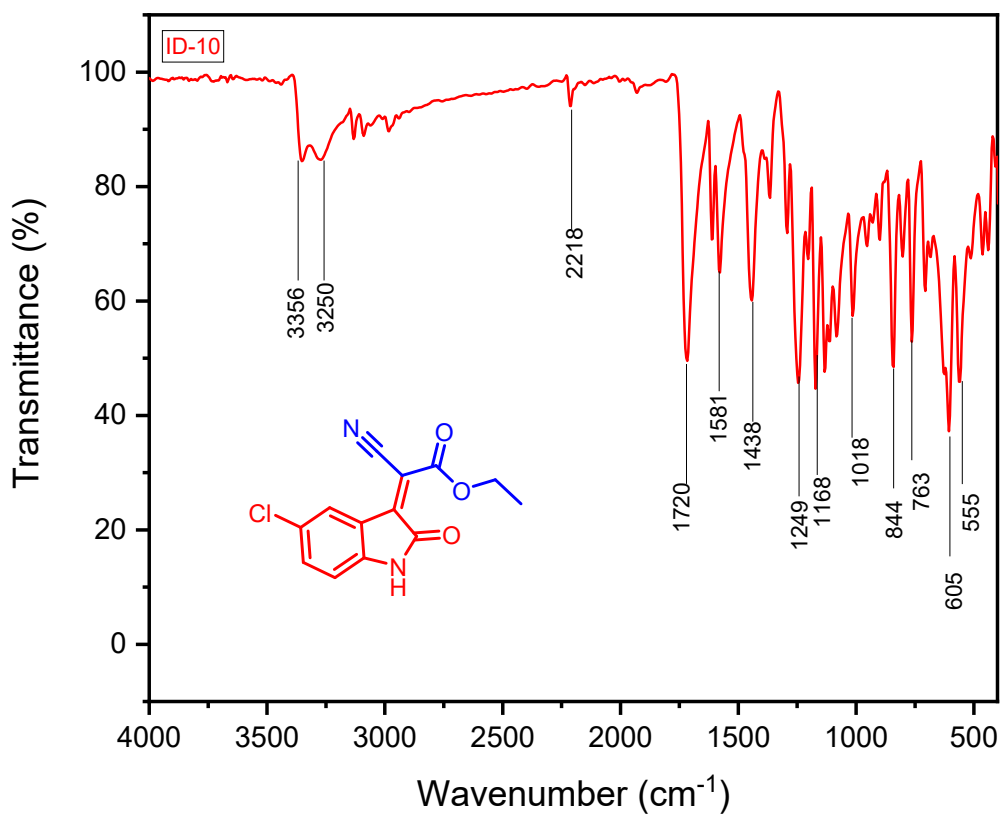

Figure S72. FT-IR spectrum of **intermediate C**.

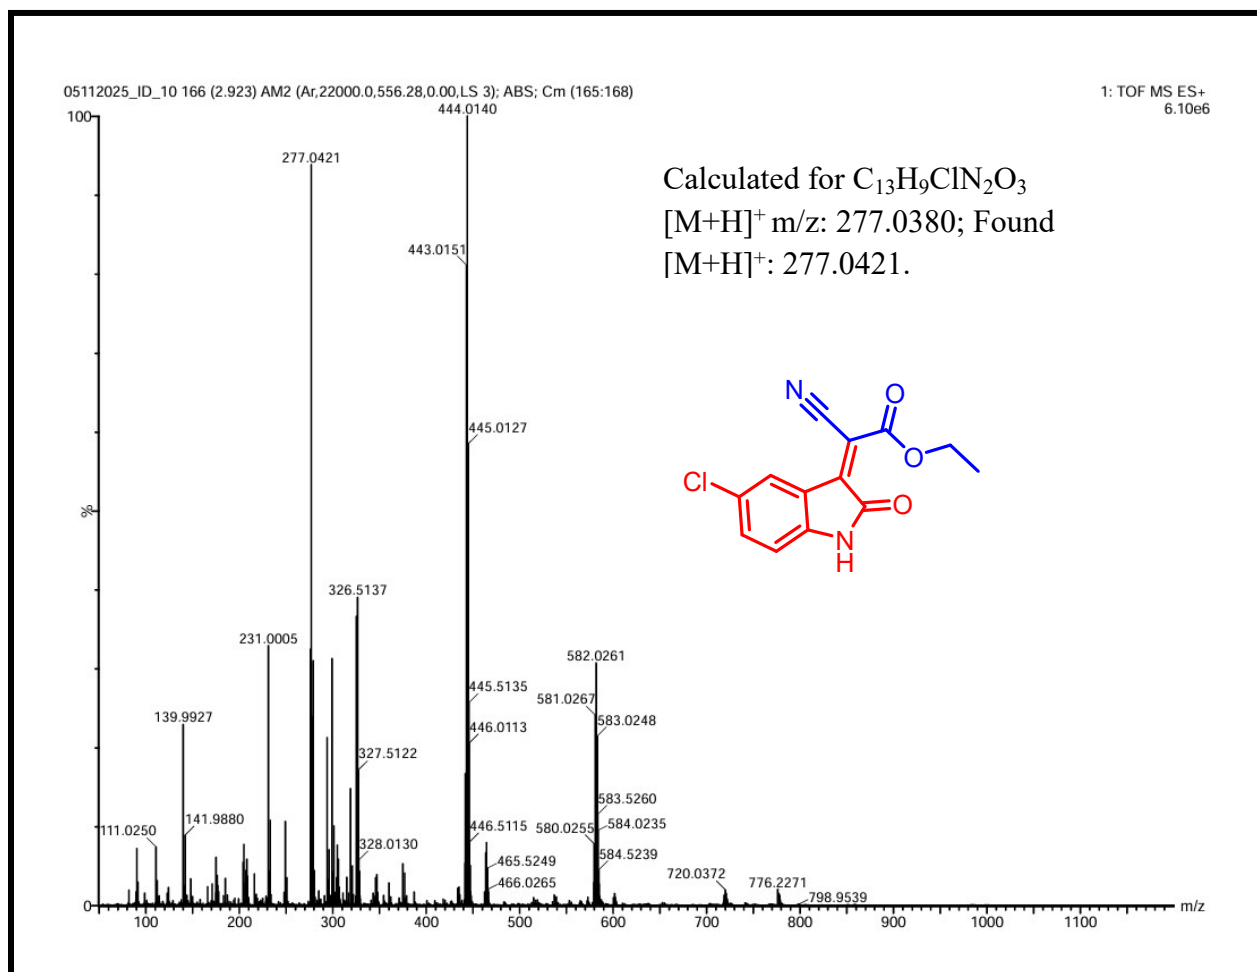

**Figure S73.** HRMS of intermediate C.

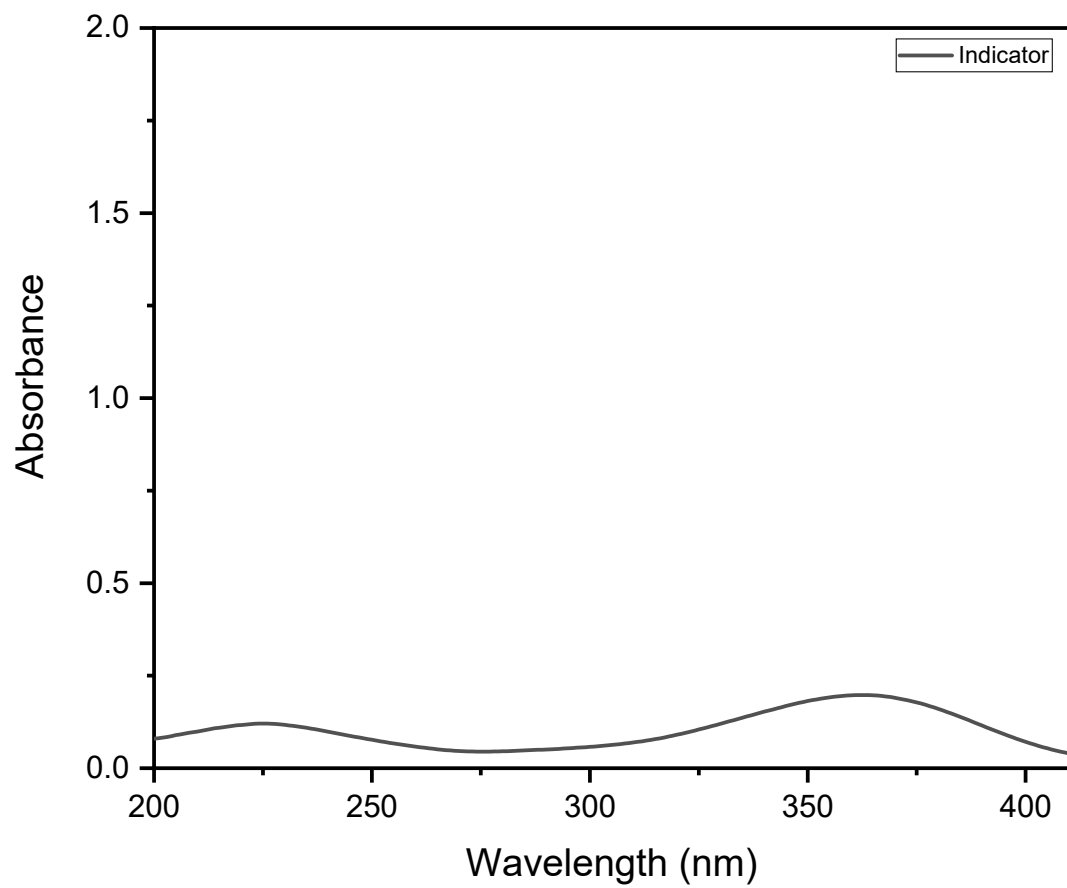

**Fig. S74.** UV-Vis spectra of  $10^{-5}$  M concentration of 4-nitroaniline in acetonitrile solution.

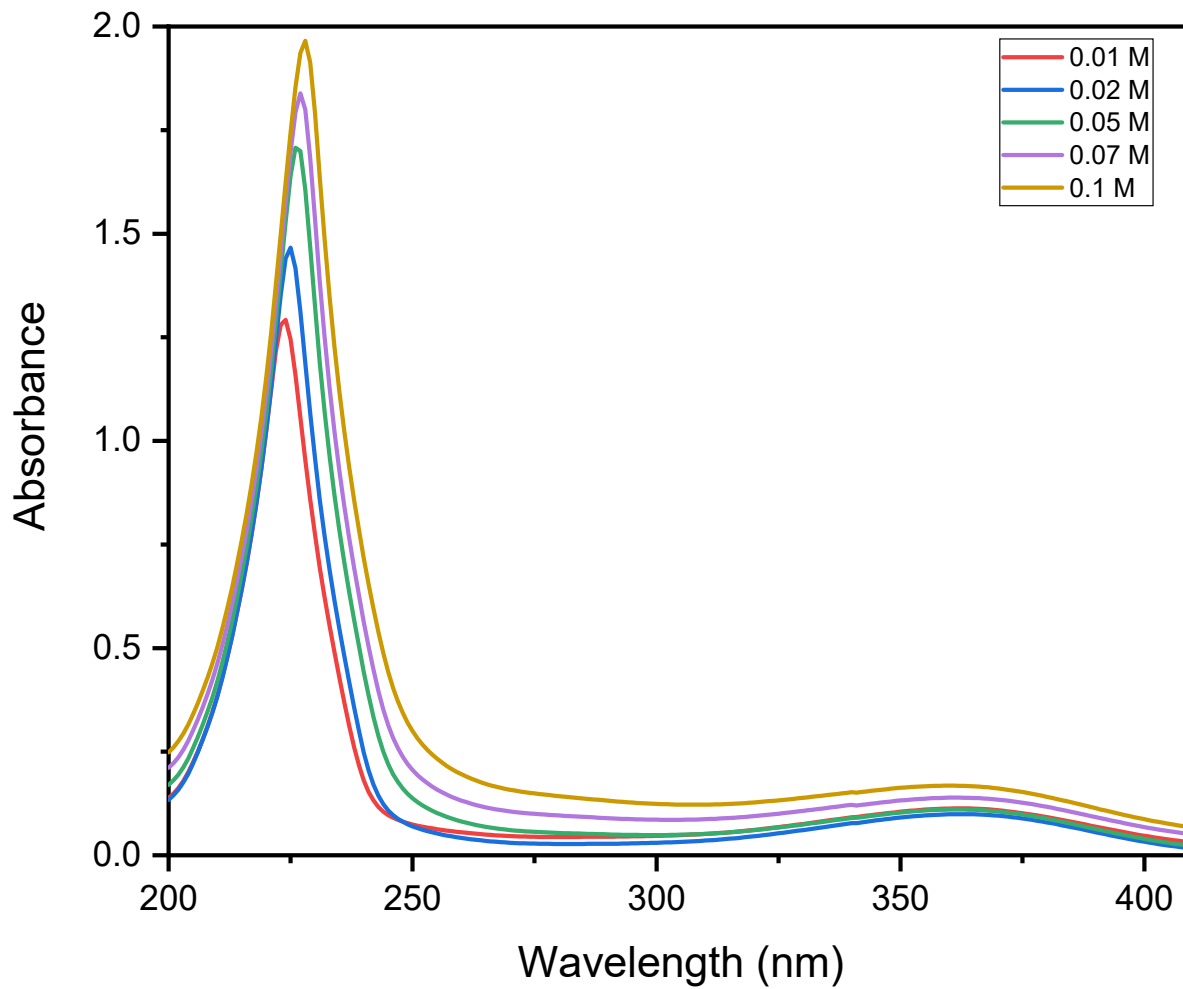

**Fig. S75.** UV-Vis spectra of 4 nitroaniline in different concentration of [CMMIM] [BF<sub>4</sub>] ionic liquid ( $10^{-5}$  M 4-nitroaniline)

**Table S2. Single Crystal data and structure refinement for 8c.**

A specimen of C<sub>20</sub>H<sub>17</sub>NO<sub>4</sub>, approximate dimensions 0.050 mm x 0.126 mm x 0.176 mm, was used for the X-ray crystallographic analysis. The X-ray intensity data were measured ( $\lambda = 0.71073 \text{ \AA}$ ) The integration of the data using a monoclinic unit cell yielded a total of 30266 reflections to a maximum  $\theta$  angle of 28.27° (0.75 Å resolution), of which 3934 were independent (average redundancy 7.693, completeness = 99.9%,  $R_{\text{int}} = 4.69\%$ ,  $R_{\text{sig}} = 3.21\%$ ) and 2836 (72.09%) were greater than  $2\sigma(F^2)$ . The final cell constants of  $a = 8.6939(15) \text{ \AA}$ ,  $b = 20.983(4) \text{ \AA}$ ,  $c = 9.7236(17) \text{ \AA}$ ,  $\beta = 116.045(5)^\circ$ , volume = 1593.7(5) Å<sup>3</sup>, are based upon the refinement of the XYZ-centroids of reflections above  $20\sigma(I)$ . The calculated minimum and maximum transmission coefficients (based on crystal size) are 0.9830 and 0.9950. The structure was solved and refined using the Bruker SHELXTL Software Package, using the space group P 1 21/n 1, with  $Z = 4$  for the formula unit, C<sub>20</sub>H<sub>17</sub>NO<sub>4</sub>. The final anisotropic full-matrix least-squares refinement on  $F^2$  with 226 variables converged at  $R1 = 4.82\%$ , for the observed data and  $wR2 = 12.17\%$  for all data. The goodness-of-fit was 1.066. The largest peak in the final difference electron density synthesis was 0.282 e<sup>-</sup>/Å<sup>3</sup> and the largest hole was -0.192 e<sup>-</sup>/Å<sup>3</sup> with an RMS deviation of 0.042 e<sup>-</sup>/Å<sup>3</sup>. On the basis of the final model, the calculated density was 1.398 g/cm<sup>3</sup> and  $F(000)$ , 704 e<sup>-</sup>.

**Table S2a. Sample and crystal data for 8c.**

|                             |                                                                                                                                                                |
|-----------------------------|----------------------------------------------------------------------------------------------------------------------------------------------------------------|
| <b>Identification code</b>  | 8c                                                                                                                                                             |
| <b>CCDC NO</b>              | 2498521                                                                                                                                                        |
| <b>Chemical formula</b>     | C <sub>20</sub> H <sub>17</sub> NO <sub>4</sub>                                                                                                                |
| <b>Formula weight</b>       | 335.35 g/mol                                                                                                                                                   |
| <b>Temperature</b>          | 300(2) K                                                                                                                                                       |
| <b>Wavelength</b>           | 0.71073 Å                                                                                                                                                      |
| <b>Crystal size</b>         | 0.050 x 0.126 x 0.176 mm                                                                                                                                       |
| <b>Crystal system</b>       | monoclinic                                                                                                                                                     |
| <b>Space group</b>          | P 1 21/n 1                                                                                                                                                     |
| <b>Unit cell dimensions</b> | $a = 8.6939(15) \text{ \AA}$ $\alpha = 90^\circ$<br>$b = 20.983(4) \text{ \AA}$ $\beta = 116.045(5)^\circ$<br>$c = 9.7236(17) \text{ \AA}$ $\gamma = 90^\circ$ |
| <b>Volume</b>               | 1593.7(5) Å <sup>3</sup>                                                                                                                                       |
| <b>Z</b>                    | 4                                                                                                                                                              |

|                               |                         |
|-------------------------------|-------------------------|
| <b>Density (calculated)</b>   | 1.398 g/cm <sup>3</sup> |
| <b>Absorption coefficient</b> | 0.098 mm <sup>-1</sup>  |
| <b>F (000)</b>                | 70                      |

**Table S2b. Data collection and structure refinement for 8c.**

|                                         |                                                                                                                                                               |
|-----------------------------------------|---------------------------------------------------------------------------------------------------------------------------------------------------------------|
| <b>Theta range for data collection</b>  | 2.52 to 28.27°                                                                                                                                                |
| <b>Index ranges</b>                     | -11<=h<=11,      -27<=k<=27,      -<br>12<=l<=11                                                                                                              |
| <b>Reflections collected</b>            | 30266                                                                                                                                                         |
| <b>Independent reflections</b>          | 3934 [R(int) = 0.0469]                                                                                                                                        |
| <b>Max. and min. transmission</b>       | 0.9950 and 0.9830                                                                                                                                             |
| <b>Structure solution technique</b>     | direct methods                                                                                                                                                |
| <b>Structure solution program</b>       | SHELXS-97 (Sheldrick 2008)                                                                                                                                    |
| <b>Refinement method</b>                | Full-matrix least-squares on F <sup>2</sup>                                                                                                                   |
| <b>Refinement program</b>               | SHELXL-2019/1 (Sheldrick, 2019)                                                                                                                               |
| <b>Function minimized</b>               | $\Sigma w (F_o^2 - F_c^2)^2$                                                                                                                                  |
| <b>Data / restraints / parameters</b>   | 3934 / 0 / 226                                                                                                                                                |
| <b>Goodness-of-fit on F<sup>2</sup></b> | 1.066                                                                                                                                                         |
| <b>Final R indices</b>                  | 2836 data; R1 = 0.0482, wR2 =<br>I>2σ(I)      0.1021<br>all data      R1 = 0.0768, wR2 =<br>0.1217                                                            |
| <b>Weighting scheme</b>                 | w=1/[σ <sup>2</sup> (F <sub>o</sub> <sup>2</sup> )+(0.0373P) <sup>2</sup> +0.8191P]<br>where P=(F <sub>o</sub> <sup>2</sup> +2F <sub>c</sub> <sup>2</sup> )/3 |
| <b>Largest diff. peak and hole</b>      | 0.282 and -0.192 eÅ <sup>-3</sup>                                                                                                                             |
| <b>R.M.S. deviation from mean</b>       | 0.042 eÅ <sup>-3</sup>                                                                                                                                        |

**Table S2c. Atomic coordinates and equivalent isotropic atomic displacement parameters ( $\text{\AA}^2$ ) for 8c.**

U(eq) is defined as one-third of the trace of the orthogonalized  $U_{ij}$  tensor.

|     | x/a         | y/b         | z/c        | U(eq) |
|-----|-------------|-------------|------------|-------|
| O1  | 0.06681(15) | 0.60588(6)  | 0.40829(1) |       |
| O2  | 0.18923(18) | 0.63634(8)  | 0.92678(1) |       |
| O3  | 0.59220(17) | 0.71227(7)  | 0.67615(1) |       |
| O4  | 0.28314(18) | 0.75870(6)  | 0.76591(1) |       |
| N2  | 0.50612(19) | 0.69838(7)  | 0.93879(1) |       |
| C1  | 0.1439(2)   | 0.62384(8)  | 0.67279(1) |       |
| C2  | 0.0900(2)   | 0.62222(9)  | 0.7969(2)  |       |
| C3  | 0.9075(3)   | 0.60470(12) | 0.7564(2)  |       |
| C4  | 0.8314(3)   | 0.55853(12) | 0.6255(3)  |       |
| C5  | 0.8557(2)   | 0.58084(11) | 0.4886(2)  |       |
| C6  | 0.0324(2)   | 0.60495(9)  | 0.53302(1) |       |
| C7  | 0.2127(2)   | 0.63644(8)  | 0.42260(1) |       |
| C8  | 0.3309(2)   | 0.65859(8)  | 0.55609(1) |       |
| C9  | 0.3234(2)   | 0.64714(8)  | 0.70782(1) |       |
| C10 | 0.2174(2)   | 0.64032(10) | 0.2713(2)  |       |
| C11 | 0.3959(3)   | 0.65557(13) | 0.2908(2)  |       |
| C12 | 0.4731(3)   | 0.70940(11) | 0.4039(2)  |       |
| C13 | 0.4763(2)   | 0.69461(8)  | 0.5562(2)  |       |
| C14 | 0.4646(2)   | 0.60321(8)  | 0.81333(1) |       |
| C15 | 0.3651(2)   | 0.70939(8)  | 0.80545(1) |       |
| C16 | 0.5683(2)   | 0.63632(8)  | 0.94638(1) |       |
| C17 | 0.7090(2)   | 0.60822(9)  | 0.0621(2)  |       |
| C18 | 0.7432(2)   | 0.54514(10) | 0.0428(2)  |       |
| C19 | 0.6417(2)   | 0.51163(9)  | 0.9120(2)  |       |
| C20 | 0.5018(2)   | 0.54095(8)  | 0.7952(2)  |       |

**Table S2d. Bond lengths (Å) for 8c.**

|         |          |         |          |
|---------|----------|---------|----------|
| O1-C6   | 1.371(2) | O1-C7   | 1.373(2) |
| O2-C2   | 1.212(2) | O3-C13  | 1.217(2) |
| O4-C15  | 1.219(2) | N2-C15  | 1.357(2) |
| N2-C16  | 1.399(2) | C1-C6   | 1.337(2) |
| C1-C2   | 1.475(2) | C1-C9   | 1.524(2) |
| C2-C3   | 1.502(3) | C3-C4   | 1.502(3) |
| C4-C5   | 1.510(3) | C5-C6   | 1.490(2) |
| C7-C8   | 1.336(2) | C7-C10  | 1.491(2) |
| C8-C13  | 1.473(2) | C8-C9   | 1.524(2) |
| C9-C14  | 1.518(2) | C9-C15  | 1.561(2) |
| C10-C11 | 1.513(3) | C11-C12 | 1.512(3) |
| C12-C13 | 1.501(3) | C14-C20 | 1.376(2) |
| C14-C16 | 1.395(2) | C16-C17 | 1.379(2) |
| C17-C18 | 1.387(3) | C18-C19 | 1.380(3) |

**Table S2e. Bond angles (°) for 8c.**

|           |            |            |            |
|-----------|------------|------------|------------|
| C6-O1-C7  | 117.90(13) | C15-N2-C16 | 112.01(14) |
| C6-C1-C2  | 118.42(15) | C6-C1-C9   | 122.46(15) |
| C2-C1-C9  | 119.12(14) | O2-C2-C1   | 120.67(16) |
| O2-C2-C3  | 121.34(17) | C1-C2-C3   | 117.97(16) |
| C2-C3-C4  | 113.72(17) | C3-C4-C5   | 111.48(18) |
| C6-C5-C4  | 112.06(16) | C1-C6-O1   | 123.53(15) |
| C1-C6-C5  | 126.19(16) | O1-C6-C5   | 110.27(14) |
| C8-C7-O1  | 122.89(15) | C8-C7-C10  | 126.64(16) |
| O1-C7-C10 | 110.47(14) | C7-C8-C13  | 118.22(15) |
| C7-C8-C9  | 122.97(15) | C13-C8-C9  | 118.80(14) |
| C14-C9-C8 | 112.61(13) | C14-C9-C1  | 113.65(13) |
| C8-C9-C1  | 107.99(12) | C14-C9-C15 | 101.18(12) |

|             |            |             |            |
|-------------|------------|-------------|------------|
| C8-C9-C15   | 111.07(13) | C1-C9-C15   | 110.26(13) |
| C7-C10-C11  | 111.03(15) | C12-C11-C10 | 110.61(18) |
| C13-C12-C11 | 111.90(17) | O3-C13-C8   | 120.42(16) |
| O3-C13-C12  | 122.10(17) | C8-C13-C12  | 117.47(15) |
| C20-C14-C16 | 119.96(15) | C20-C14-C9  | 131.00(15) |
| C16-C14-C9  | 109.04(14) | O4-C15-N2   | 127.13(16) |
| O4-C15-C9   | 124.81(15) | N2-C15-C9   | 108.06(14) |
| C17-C16-C14 | 121.63(16) | C17-C16-N2  | 128.67(16) |
| C14-C16-N2  | 109.70(14) | C16-C17-C18 | 117.65(17) |
| C19-C18-C17 | 121.47(17) | C18-C19-C20 | 120.21(17) |
| C14-C20-C19 | 119.07(16) |             |            |

**Table S2f. Anisotropic atomic displacement parameters ( $\text{\AA}^2$ ) for 8c.**

The anisotropic atomic displacement factor exponent takes the form:  $-2\pi^2 [h^2 a^{*2} U_{11} + \dots + 2 h k a^* b^* U_{12}]$

|     | $U_{11}$   | $U_{22}$   | $U_{33}$   | $U_{23}$    | $U_{13}$   | $U_{12}$    |
|-----|------------|------------|------------|-------------|------------|-------------|
| O1  | 0.0319(6)  | 0.0581(8)  | 0.0288(6)  | -0.0064(5)  | 0.0101(5)  | -0.0104(6)  |
| O2  | 0.0522(8)  | 0.0799(10) | 0.0332(7)  | -0.0044(7)  | 0.0199(7)  | -0.0060(7)  |
| O3  | 0.0432(8)  | 0.0658(9)  | 0.0429(8)  | -0.0063(7)  | 0.0125(6)  | -0.0208(7)  |
| O4  | 0.0571(8)  | 0.0358(7)  | 0.0478(8)  | 0.0037(6)   | 0.0198(7)  | 0.0115(6)   |
| N2  | 0.0415(8)  | 0.0342(8)  | 0.0299(7)  | -0.0081(6)  | 0.0073(6)  | -0.0039(6)  |
| C1  | 0.0270(8)  | 0.0359(9)  | 0.0298(8)  | 0.0021(7)   | 0.0105(7)  | 0.0024(7)   |
| C2  | 0.0369(9)  | 0.0446(10) | 0.0358(10) | 0.0014(8)   | 0.0165(8)  | 0.0026(8)   |
| C3  | 0.0455(12) | 0.0836(16) | 0.0537(13) | -0.0078(11) | 0.0307(10) | -0.0084(11) |
| C4  | 0.0431(11) | 0.0795(16) | 0.0593(13) | -0.0038(12) | 0.0250(10) | -0.0167(11) |
| C5  | 0.0316(10) | 0.0724(14) | 0.0438(11) | -0.0063(10) | 0.0126(8)  | -0.0126(9)  |
| C6  | 0.0282(8)  | 0.0441(10) | 0.0325(9)  | 0.0008(7)   | 0.0124(7)  | -0.0009(7)  |
| C7  | 0.0285(8)  | 0.0382(9)  | 0.0288(8)  | 0.0022(7)   | 0.0098(7)  | 0.0006(7)   |
| C8  | 0.0280(8)  | 0.0343(8)  | 0.0268(8)  | 0.0027(6)   | 0.0093(7)  | 0.0014(6)   |
| C9  | 0.0271(8)  | 0.0333(8)  | 0.0246(8)  | -0.0011(6)  | 0.0084(6)  | -0.0006(6)  |
| C10 | 0.0408(10) | 0.0581(12) | 0.0286(9)  | -0.0001(8)  | 0.0127(8)  | -0.0028(9)  |
| C11 | 0.0497(12) | 0.0944(18) | 0.0355(10) | -0.0046(11) | 0.0225(9)  | -0.0117(12) |
| C12 | 0.0464(11) | 0.0680(14) | 0.0430(11) | 0.0084(10)  | 0.0199(9)  | -0.0130(10) |
| C13 | 0.0338(9)  | 0.0387(9)  | 0.0373(9)  | 0.0016(7)   | 0.0139(8)  | -0.0022(7)  |
| C14 | 0.0261(8)  | 0.0339(8)  | 0.0258(8)  | 0.0017(6)   | 0.0091(6)  | -0.0010(6)  |

|     | $U_{11}$   | $U_{22}$   | $U_{33}$   | $U_{23}$   | $U_{13}$  | $U_{12}$   |
|-----|------------|------------|------------|------------|-----------|------------|
| C15 | 0.0379(9)  | 0.0342(9)  | 0.0320(9)  | 0.0010(7)  | 0.0149(7) | -0.0004(7) |
| C16 | 0.0312(8)  | 0.0362(9)  | 0.0260(8)  | 0.0003(6)  | 0.0088(7) | -0.0016(7) |
| C17 | 0.0347(9)  | 0.0549(12) | 0.0282(9)  | 0.0013(8)  | 0.0052(7) | -0.0012(8) |
| C18 | 0.0382(10) | 0.0568(12) | 0.0389(10) | 0.0129(9)  | 0.0093(8) | 0.0123(9)  |
| C19 | 0.0449(11) | 0.0381(10) | 0.0493(11) | 0.0087(8)  | 0.0220(9) | 0.0106(8)  |
| C20 | 0.0349(9)  | 0.0361(9)  | 0.0350(9)  | -0.0027(7) | 0.0143(7) | -0.0019(7) |

**Table S2g. Hydrogen atomic coordinates and isotropic atomic displacement parameters ( $\text{\AA}^2$ ) for 8c.**

|      | x/a     | y/b    | z/c    | U(eq)    |
|------|---------|--------|--------|----------|
| H2   | 0.5519  | 0.7262 | 1.0102 | 0.046000 |
| H3A  | -0.1612 | 0.6432 | 0.7301 | 0.069000 |
| H3B  | -0.0978 | 0.5862 | 0.8455 | 0.069000 |
| H4A  | -0.2900 | 0.5538 | 0.5965 | 0.072000 |
| H4B  | -0.1150 | 0.5172 | 0.6579 | 0.072000 |
| H5A  | -0.1675 | 0.5457 | 0.4173 | 0.061000 |
| H5B  | -0.2258 | 0.6145 | 0.4370 | 0.061000 |
| H10A | 0.1388  | 0.6731 | 0.2095 | 0.052000 |
| H10B | 0.1804  | 0.6000 | 0.2181 | 0.052000 |
| H11A | 0.4676  | 0.6180 | 0.3269 | 0.070000 |
| H11B | 0.3912  | 0.6676 | 0.1927 | 0.070000 |
| H12A | 0.5889  | 0.7172 | 0.4177 | 0.063000 |
| H12B | 0.4070  | 0.7479 | 0.3628 | 0.063000 |
| H17  | 0.7784  | 0.6307 | 1.1499 | 0.051000 |
| H18  | 0.8367  | 0.5250 | 1.1198 | 0.057000 |
| H19  | 0.6670  | 0.4693 | 0.9019 | 0.052000 |
| H20  | 0.4343  | 0.5188 | 0.7061 | 0.043000 |

**Table S3. Single Crystal data and structure refinement for 9a**

A specimen of  $C_{21}H_{22}N_2O_5$ , approximate dimensions 0.085 mm x 0.181 mm x 0.188 mm, was used for the X-ray crystallographic analysis. The X-ray intensity data were measured ( $\lambda = 0.71073$  Å). The integration of the data using a monoclinic unit cell yielded a total of 36347 reflections to a maximum  $\theta$  angle of  $28.29^\circ$  (0.75 Å resolution), of which 4724 were independent (average redundancy 7.694, completeness = 100.0%,  $R_{int} = 4.57\%$ ,  $R_{sig} = 3.04\%$ ) and 3480 (73.67%) were greater than  $2\sigma(F^2)$ . The final cell constants of  $a = 8.5244(4)$  Å,  $b = 11.6767(5)$  Å,  $c = 19.3306(8)$  Å,  $\beta = 99.0810(10)^\circ$ , volume =  $1899.99(14)$  Å<sup>3</sup>, are based upon the refinement of the XYZ-centroids of reflections above  $20\sigma(I)$ . The calculated minimum and maximum transmission coefficients (based on crystal size) are 0.9820 and 0.9920. The structure was solved and refined using the Bruker SHELXTL Software Package, using the space group P 1 21/n 1, with  $Z = 4$  for the formula unit,  $C_{21}H_{22}N_2O_5$ . The final anisotropic full-matrix least-squares refinement on  $F^2$  with 256 variables converged at  $R1 = 5.11\%$ , for the observed data and  $wR2 = 12.90\%$  for all data. The goodness-of-fit was 1.082. The largest peak in the final difference electron density synthesis was  $0.221 e^-/\text{Å}^3$  and the largest hole was  $-0.248 e^-/\text{Å}^3$  with an RMS deviation of  $0.048 e^-/\text{Å}^3$ . On the basis of the final model, the calculated density was  $1.337 \text{ g/cm}^3$  and  $F(000)$ , 808  $e^-$ .

**Table S3a. Sample and crystal data for work 9a.**

|                            |                          |
|----------------------------|--------------------------|
| <b>Identification code</b> | 9a                       |
| <b>CCDC NO</b>             | 2500027                  |
| <b>Chemical formula</b>    | $C_{21}H_{22}N_2O_5$     |
| <b>Formula weight</b>      | 382.40 g/mol             |
| <b>Temperature</b>         | 300(2) K                 |
| <b>Wavelength</b>          | 0.71073 Å                |
| <b>Crystal size</b>        | 0.085 x 0.181 x 0.188 mm |
| <b>Crystal system</b>      | monoclinic               |
| <b>Space group</b>         | P 1 21/n 1               |

|                               |                            |                             |
|-------------------------------|----------------------------|-----------------------------|
| <b>Unit cell dimensions</b>   | a = 8.5244(4) Å            | $\alpha = 90^\circ$         |
|                               | b = 11.6767(5) Å           | $\beta = 99.0810(10)^\circ$ |
|                               | c = 19.3306(8) Å           | $\gamma = 90^\circ$         |
| <b>Volume</b>                 | 1899.99(14) Å <sup>3</sup> |                             |
| <b>Z</b>                      | 4                          |                             |
| <b>Density (calculated)</b>   | 1.337 g/cm <sup>3</sup>    |                             |
| <b>Absorption coefficient</b> | 0.096 mm <sup>-1</sup>     |                             |
| <b>F (000)</b>                | 808                        |                             |

**Table S3b. Data collection and structure refinement for 9a**

|                                         |                                             |                        |   |
|-----------------------------------------|---------------------------------------------|------------------------|---|
| <b>Theta range for data collection</b>  | 2.04 to 28.29°                              |                        |   |
| <b>Index ranges</b>                     | -11 ≤ h ≤ 11,                               | -15 ≤ k ≤ 15,          | - |
|                                         | 25 ≤ l ≤ 25                                 |                        |   |
| <b>Reflections collected</b>            | 36347                                       |                        |   |
| <b>Independent reflections</b>          | 4724 [R(int) = 0.0457]                      |                        |   |
| <b>Max. and min. transmission</b>       | 0.9920 and 0.9820                           |                        |   |
| <b>Structure solution technique</b>     | direct methods                              |                        |   |
| <b>Structure solution program</b>       | XT, VERSION 2018/2                          |                        |   |
| <b>Refinement method</b>                | Full-matrix least-squares on F <sup>2</sup> |                        |   |
| <b>Refinement program</b>               | SHELXL-2019/1 (Sheldrick, 2019)             |                        |   |
| <b>Function minimized</b>               | $\Sigma w (F_o^2 - F_c^2)^2$                |                        |   |
| <b>Data / restraints / parameters</b>   | 4724 / 0 / 256                              |                        |   |
| <b>Goodness-of-fit on F<sup>2</sup></b> | 1.082                                       |                        |   |
| <b>Final R indices</b>                  | 3480                                        | data; R1 = 0.0511, wR2 |   |
|                                         | I > 2σ(I)                                   | = 0.1106               |   |
|                                         | all data                                    | R1 = 0.0767, wR2       |   |

$$= 0.1290$$

|                                    |                                                                           |
|------------------------------------|---------------------------------------------------------------------------|
| <b>Weighting scheme</b>            | $w=1/[\sigma^2(F_o^2)+(0.0411P)^2+0.9465P]$<br>where $P=(F_o^2+2F_c^2)/3$ |
| <b>Largest diff. peak and hole</b> | 0.221 and -0.248 eÅ <sup>-3</sup>                                         |
| <b>R.M.S. deviation from mean</b>  | 0.048 eÅ <sup>-3</sup>                                                    |

**Table S3c. Atomic coordinates and equivalent isotropic atomic displacement parameters (Å<sup>2</sup>) for 9a.**

U(eq) is defined as one-third of the trace of the orthogonalized U<sub>ij</sub> tensor.

|    | x/a         | y/b         | z/c         | U(eq)     |
|----|-------------|-------------|-------------|-----------|
| O1 | 0.24223(16) | 0.45141(11) | 0.37135(7)  | 0.0456(3) |
| O2 | 0.41612(15) | 0.17444(11) | 0.24676(6)  | 0.0430(3) |
| O3 | 0.65229(17) | 0.45539(12) | 0.40465(7)  | 0.0549(4) |
| O4 | 0.15650(15) | 0.21641(12) | 0.44228(7)  | 0.0487(3) |
| O5 | 0.07285(15) | 0.07460(11) | 0.36743(7)  | 0.0465(3) |
| N2 | 0.37986(17) | 0.39946(12) | 0.47815(7)  | 0.0357(3) |
| N3 | 0.2201(2)   | 0.05471(15) | 0.25666(9)  | 0.0571(5) |
| C1 | 0.51799(19) | 0.31623(14) | 0.33017(8)  | 0.0306(3) |
| C2 | 0.51209(19) | 0.26572(14) | 0.26785(8)  | 0.0326(3) |
| C3 | 0.6029(2)   | 0.30022(16) | 0.21112(9)  | 0.0402(4) |
| C4 | 0.7538(2)   | 0.36830(15) | 0.23724(9)  | 0.0375(4) |
| C5 | 0.7131(2)   | 0.45760(15) | 0.28913(10) | 0.0414(4) |
| C6 | 0.6299(2)   | 0.41171(15) | 0.34656(9)  | 0.0361(4) |

|     | x/a         | y/b         | z/c         | U(eq)     |
|-----|-------------|-------------|-------------|-----------|
| C7  | 0.41397(18) | 0.27907(13) | 0.38358(8)  | 0.0289(3) |
| C8  | 0.29402(18) | 0.19116(14) | 0.35002(8)  | 0.0314(3) |
| C9  | 0.3071(2)   | 0.14055(15) | 0.28783(9)  | 0.0369(4) |
| C10 | 0.8092(3)   | 0.42865(19) | 0.17502(11) | 0.0555(5) |
| C11 | 0.8838(2)   | 0.28905(19) | 0.27256(12) | 0.0565(5) |
| C12 | 0.50683(18) | 0.23685(14) | 0.45255(8)  | 0.0315(3) |
| C13 | 0.33206(19) | 0.38768(14) | 0.40855(8)  | 0.0320(3) |
| C14 | 0.48112(19) | 0.31107(15) | 0.50608(8)  | 0.0341(4) |
| C15 | 0.5475(2)   | 0.29227(18) | 0.57475(9)  | 0.0468(5) |
| C16 | 0.6399(2)   | 0.1953(2)   | 0.58933(11) | 0.0570(6) |
| C17 | 0.6643(2)   | 0.11969(19) | 0.53710(12) | 0.0555(6) |
| C18 | 0.5971(2)   | 0.14020(16) | 0.46761(10) | 0.0423(4) |
| C19 | 0.1655(2)   | 0.15279(15) | 0.38558(9)  | 0.0360(4) |
| C20 | 0.0235(3)   | 0.2007(2)   | 0.47959(12) | 0.0626(6) |
| C21 | 0.0022(4)   | 0.3092(3)   | 0.51629(16) | 0.0889(9) |

**Table S3d. Bond lengths (Å) for 9a.**

|        |          |        |          |
|--------|----------|--------|----------|
| O1-C13 | 1.218(2) | O2-C2  | 1.366(2) |
| O2-C9  | 1.372(2) | O3-C6  | 1.221(2) |
| O4-C19 | 1.336(2) | O4-C20 | 1.448(2) |
| O5-C19 | 1.222(2) | N2-C13 | 1.350(2) |
| N2-C14 | 1.398(2) | N3-C9  | 1.333(2) |
| C1-C2  | 1.335(2) | C1-C6  | 1.469(2) |

|         |          |         |          |
|---------|----------|---------|----------|
| C1-C7   | 1.526(2) | C2-C3   | 1.494(2) |
| C3-C4   | 1.529(3) | C4-C11  | 1.520(3) |
| C4-C5   | 1.524(2) | C4-C10  | 1.532(2) |
| C5-C6   | 1.507(2) | C7-C8   | 1.520(2) |
| C7-C12  | 1.521(2) | C7-C13  | 1.561(2) |
| C8-C9   | 1.360(2) | C8-C19  | 1.453(2) |
| C12-C18 | 1.371(2) | C12-C14 | 1.393(2) |
| C14-C15 | 1.376(2) | C15-C16 | 1.383(3) |
| C16-C17 | 1.381(3) | C17-C18 | 1.395(3) |
| C20-C21 | 1.478(3) |         |          |

**Table S3e. Bond angles (°) for 9a.**

|            |            |            |            |
|------------|------------|------------|------------|
| C2-O2-C9   | 118.72(13) | C19-O4-C20 | 119.27(15) |
| C13-N2-C14 | 112.37(14) | C2-C1-C6   | 117.41(14) |
| C2-C1-C7   | 122.80(14) | C6-C1-C7   | 119.79(13) |
| C1-C2-O2   | 123.33(15) | C1-C2-C3   | 126.38(15) |
| O2-C2-C3   | 110.27(13) | C2-C3-C4   | 113.85(14) |
| C11-C4-C5  | 110.26(16) | C11-C4-C3  | 110.34(16) |
| C5-C4-C3   | 107.83(14) | C11-C4-C10 | 109.83(16) |
| C5-C4-C10  | 109.42(15) | C3-C4-C10  | 109.13(15) |
| C6-C5-C4   | 115.08(14) | O3-C6-C1   | 121.15(15) |
| O3-C6-C5   | 120.37(16) | C1-C6-C5   | 118.44(14) |
| C8-C7-C12  | 112.16(13) | C8-C7-C1   | 109.07(12) |
| C12-C7-C1  | 114.05(13) | C8-C7-C13  | 112.16(13) |

|             |            |             |            |
|-------------|------------|-------------|------------|
| C12-C7-C13  | 100.87(12) | C1-C7-C13   | 108.32(12) |
| C9-C8-C19   | 117.23(15) | C9-C8-C7    | 121.81(14) |
| C19-C8-C7   | 120.86(14) | N3-C9-C8    | 127.50(16) |
| N3-C9-O2    | 109.55(15) | C8-C9-O2    | 122.94(15) |
| C18-C12-C14 | 120.21(16) | C18-C12-C7  | 130.53(16) |
| C14-C12-C7  | 109.16(14) | O1-C13-N2   | 126.09(15) |
| O1-C13-C7   | 125.75(14) | N2-C13-C7   | 108.16(13) |
| C15-C14-C12 | 121.89(17) | C15-C14-N2  | 128.68(17) |
| C12-C14-N2  | 109.41(14) | C14-C15-C16 | 117.48(19) |
| C17-C16-C15 | 121.39(18) | C16-C17-C18 | 120.52(19) |
| C12-C18-C17 | 118.48(19) | O5-C19-O4   | 122.18(16) |
| O5-C19-C8   | 126.59(16) | O4-C19-C8   | 111.22(14) |
| O4-C20-C21  | 107.22(18) |             |            |

**Table S3f. Anisotropic atomic displacement parameters ( $\text{\AA}^2$ ) for 9a.**

The anisotropic atomic displacement factor exponent takes the form:

$$-2\pi^2 [h^2 a^{*2} U_{11} + \dots + 2 h k a^* b^* U_{12}]$$

|    | $U_{11}$  | $U_{22}$  | $U_{33}$  | $U_{23}$   | $U_{13}$  | $U_{12}$   |
|----|-----------|-----------|-----------|------------|-----------|------------|
| O1 | 0.0522(8) | 0.0421(7) | 0.0437(7) | 0.0086(6)  | 0.0111(6) | 0.0124(6)  |
| O2 | 0.0451(7) | 0.0497(8) | 0.0363(6) | -0.0152(6) | 0.0123(5) | -0.0125(6) |
| O3 | 0.0647(9) | 0.0569(9) | 0.0481(8) | -0.0240(7) | 0.0243(7) | -0.0258(7) |
| O4 | 0.0443(7) | 0.0616(9) | 0.0441(7) | -0.0107(6) | 0.0193(6) | -0.0192(6) |
| O5 | 0.0404(7) | 0.0450(8) | 0.0535(8) | -0.0003(6) | 0.0057(6) | -0.0142(6) |

|     | $U_{11}$   | $U_{22}$   | $U_{33}$   | $U_{23}$    | $U_{13}$   | $U_{12}$    |
|-----|------------|------------|------------|-------------|------------|-------------|
| N2  | 0.0443(8)  | 0.0332(7)  | 0.0313(7)  | -0.0067(6)  | 0.0118(6)  | -0.0026(6)  |
| N3  | 0.0583(11) | 0.0631(11) | 0.0517(10) | -0.0267(9)  | 0.0144(8)  | -0.0266(9)  |
| C1  | 0.0330(8)  | 0.0309(8)  | 0.0289(8)  | -0.0025(6)  | 0.0080(6)  | -0.0021(6)  |
| C2  | 0.0332(8)  | 0.0330(8)  | 0.0322(8)  | -0.0026(7)  | 0.0065(6)  | -0.0005(7)  |
| C3  | 0.0431(10) | 0.0476(11) | 0.0320(8)  | -0.0022(7)  | 0.0129(7)  | 0.0017(8)   |
| C4  | 0.0359(9)  | 0.0396(10) | 0.0393(9)  | 0.0040(7)   | 0.0133(7)  | 0.0038(7)   |
| C5  | 0.0454(10) | 0.0342(9)  | 0.0478(10) | 0.0010(8)   | 0.0170(8)  | -0.0024(8)  |
| C6  | 0.0373(9)  | 0.0327(9)  | 0.0403(9)  | -0.0051(7)  | 0.0125(7)  | -0.0017(7)  |
| C7  | 0.0302(8)  | 0.0284(8)  | 0.0282(7)  | -0.0018(6)  | 0.0053(6)  | -0.0025(6)  |
| C8  | 0.0308(8)  | 0.0318(8)  | 0.0309(8)  | -0.0018(6)  | 0.0025(6)  | -0.0034(6)  |
| C9  | 0.0339(8)  | 0.0380(9)  | 0.0378(9)  | -0.0060(7)  | 0.0029(7)  | -0.0051(7)  |
| C10 | 0.0566(12) | 0.0633(13) | 0.0527(12) | 0.0073(10)  | 0.0276(10) | -0.0010(10) |
| C11 | 0.0446(11) | 0.0565(13) | 0.0684(14) | 0.0064(11)  | 0.0092(10) | 0.0133(10)  |
| C12 | 0.0289(8)  | 0.0334(8)  | 0.0319(8)  | 0.0011(6)   | 0.0040(6)  | -0.0062(6)  |
| C13 | 0.0353(8)  | 0.0302(8)  | 0.0322(8)  | 0.0011(7)   | 0.0111(6)  | -0.0023(7)  |
| C14 | 0.0349(8)  | 0.0392(9)  | 0.0286(8)  | -0.0001(7)  | 0.0061(6)  | -0.0092(7)  |
| C15 | 0.0489(11) | 0.0613(13) | 0.0295(9)  | 0.0020(8)   | 0.0041(8)  | -0.0128(9)  |
| C16 | 0.0490(12) | 0.0792(16) | 0.0390(10) | 0.0197(11)  | -0.0050(9) | -0.0100(11) |
| C17 | 0.0422(11) | 0.0556(13) | 0.0652(13) | 0.0246(11)  | -0.0022(9) | 0.0009(9)   |
| C18 | 0.0362(9)  | 0.0394(10) | 0.0512(11) | 0.0043(8)   | 0.0064(8)  | -0.0001(8)  |
| C19 | 0.0331(8)  | 0.0379(9)  | 0.0355(8)  | 0.0052(7)   | 0.0010(7)  | -0.0024(7)  |
| C20 | 0.0539(13) | 0.0844(17) | 0.0561(13) | -0.0052(12) | 0.0288(10) | -0.0212(12) |
| C21 | 0.0814(18) | 0.106(2)   | 0.092(2)   | -0.0231(17) | 0.0528(16) | -0.0154(17) |

**Table S3g. Hydrogen atomic coordinates and isotropic atomic displacement parameters ( $\text{\AA}^2$ ) for 9a.**

|      | x/a     | y/b    | z/c    | U(eq)    |
|------|---------|--------|--------|----------|
| H2   | 0.3513  | 0.4550 | 0.5026 | 0.043000 |
| H3A  | 0.1457  | 0.0252 | 0.2762 | 0.068000 |
| H3B  | 0.2384  | 0.0289 | 0.2170 | 0.068000 |
| H3C  | 0.5344  | 0.3461 | 0.1770 | 0.048000 |
| H3D  | 0.6316  | 0.2319 | 0.1875 | 0.048000 |
| H5A  | 0.8106  | 0.4948 | 0.3105 | 0.050000 |
| H5B  | 0.6462  | 0.5156 | 0.2635 | 0.050000 |
| H10A | 0.8298  | 0.3727 | 0.1412 | 0.083000 |
| H10B | 0.9047  | 0.4709 | 0.1911 | 0.083000 |
| H10C | 0.7280  | 0.4803 | 0.1538 | 0.083000 |
| H11A | 0.9111  | 0.2350 | 0.2390 | 0.085000 |
| H11B | 0.8466  | 0.2487 | 0.3101 | 0.085000 |
| H11C | 0.9759  | 0.3334 | 0.2909 | 0.085000 |
| H15  | 0.5308  | 0.3429 | 0.6100 | 0.056000 |
| H16  | 0.6866  | 0.1806 | 0.6353 | 0.068000 |
| H17  | 0.7259  | 0.0546 | 0.5483 | 0.067000 |
| H18  | 0.6132  | 0.0895 | 0.4323 | 0.051000 |
| H20A | 0.0450  | 0.1385 | 0.5130 | 0.075000 |
| H20B | -0.0718 | 0.1824 | 0.4470 | 0.075000 |
| H21A | -0.0241 | 0.3693 | 0.4825 | 0.133000 |
| H21B | 0.0988  | 0.3282 | 0.5467 | 0.133000 |

|      | x/a     | y/b    | z/c    | U(eq)    |
|------|---------|--------|--------|----------|
| H21C | -0.0822 | 0.3007 | 0.5435 | 0.133000 |

**Table S4. Single Crystal data and structure refinement for 9i.**

A specimen of  $C_{23}H_{20}N_4O_4$ , approximate dimensions 0.070 mm x 0.256 mm x 0.300 mm, was used for the X-ray crystallographic analysis. The X-ray intensity data were measured ( $\lambda = 0.71073$  Å).

The integration of the data using a triclinic unit cell yielded a total of 39163 reflections to a maximum  $\theta$  angle of  $28.33^\circ$  (0.75 Å resolution), of which 4995 were independent (average redundancy 7.840, completeness = 99.7%,  $R_{int} = 5.49\%$ ,  $R_{sig} = 3.39\%$ ) and 3244 (64.94%) were greater than  $2\sigma(F^2)$ . The final cell constants of  $a = 9.1800(7)$  Å,  $b = 10.8402(8)$  Å,  $c = 11.1726(9)$  Å,  $\alpha = 71.138(3)^\circ$ ,  $\beta = 89.122(3)^\circ$ ,  $\gamma = 73.437(3)^\circ$ , volume =  $1004.83(14)$  Å<sup>3</sup>, are based upon the refinement of the XYZ-centroids of reflections above  $20\sigma(I)$ . The calculated minimum and maximum transmission coefficients (based on crystal size) are 0.9720 and 0.9930.

The structure was solved and refined using the Bruker SHELXTL Software Package, using the space group P -1, with  $Z = 2$  for the formula unit,  $C_{23}H_{20}N_4O_4$ . The final anisotropic full-matrix least-squares refinement on  $F^2$  with 282 variables converged at  $R1 = 6.26\%$ , for the observed data and  $wR2 = 19.63\%$  for all data. The goodness-of-fit was 1.072. The largest peak in the final difference electron density synthesis was  $0.234 e^-/\text{Å}^3$  and the largest hole was  $-0.276 e^-/\text{Å}^3$  with an RMS deviation of  $0.056 e^-/\text{Å}^3$ . On the basis of the final model, the calculated density was  $1.376 \text{ g/cm}^3$  and  $F(000)$ , 436  $e^-$ .

**Table S4a. Sample and crystal data for 9i.**

|                            |                          |
|----------------------------|--------------------------|
| <b>Identification code</b> | 9i                       |
| <b>CCDC NO</b>             | 2515684                  |
| <b>Chemical formula</b>    | $C_{23}H_{20}N_4O_4$     |
| <b>Formula weight</b>      | 416.43 g/mol             |
| <b>Temperature</b>         | 302(2) K                 |
| <b>Wavelength</b>          | 0.71073 Å                |
| <b>Crystal size</b>        | 0.070 x 0.256 x 0.300 mm |
| <b>Crystal system</b>      | triclinic                |

|                               |                            |                            |
|-------------------------------|----------------------------|----------------------------|
| <b>Space group</b>            | P -1                       |                            |
| <b>Unit cell dimensions</b>   | a = 9.1800(7) Å            | $\alpha = 71.138(3)^\circ$ |
|                               | b = 10.8402(8) Å           | $\beta = 89.122(3)^\circ$  |
|                               | c = 11.1726(9) Å           | $\gamma = 73.437(3)^\circ$ |
| <b>Volume</b>                 | 1004.83(14) Å <sup>3</sup> |                            |
| <b>Z</b>                      | 2                          |                            |
| <b>Density (calculated)</b>   | 1.376 g/cm <sup>3</sup>    |                            |
| <b>Absorption coefficient</b> | 0.097 mm <sup>-1</sup>     |                            |
| <b>F(000)</b>                 | 436                        |                            |

**Table S4b. Data collection and structure refinement for 9i**

|                                         |                                                                                                                                                                       |  |
|-----------------------------------------|-----------------------------------------------------------------------------------------------------------------------------------------------------------------------|--|
| <b>Theta range for data collection</b>  | 1.93 to 28.33°                                                                                                                                                        |  |
| <b>Index ranges</b>                     | -12 ≤ h ≤ 12, -14 ≤ k ≤ 14, -14 ≤ l ≤ 14                                                                                                                              |  |
| <b>Reflections collected</b>            | 39163                                                                                                                                                                 |  |
| <b>Independent reflections</b>          | 4995 [R(int) = 0.0549]                                                                                                                                                |  |
| <b>Max. and min. transmission</b>       | 0.9930 and 0.9720                                                                                                                                                     |  |
| <b>Structure solution technique</b>     | direct methods                                                                                                                                                        |  |
| <b>Structure solution program</b>       | XT, VERSION 2018/2                                                                                                                                                    |  |
| <b>Refinement method</b>                | Full-matrix least-squares on F <sup>2</sup>                                                                                                                           |  |
| <b>Refinement program</b>               | SHELXL-2019/1 (Sheldrick, 2019)                                                                                                                                       |  |
| <b>Function minimized</b>               | $\Sigma w (F_o^2 - F_c^2)^2$                                                                                                                                          |  |
| <b>Data / restraints / parameters</b>   | 4995 / 0 / 282                                                                                                                                                        |  |
| <b>Goodness-of-fit on F<sup>2</sup></b> | 1.072                                                                                                                                                                 |  |
| <b>Final R indices</b>                  | 3244 data; R1 = 0.0626, wR2 = 0.1519<br>I > 2σ(I)                                                                                                                     |  |
|                                         | all data R1 = 0.1059, wR2 = 0.1963                                                                                                                                    |  |
| <b>Weighting scheme</b>                 | w = 1/[σ <sup>2</sup> (F <sub>o</sub> <sup>2</sup> ) + (0.0715P) <sup>2</sup> + 0.8525P]<br>where P = (F <sub>o</sub> <sup>2</sup> + 2F <sub>c</sub> <sup>2</sup> )/3 |  |

**Largest diff. peak and hole**      0.234 and -0.276 eÅ<sup>-3</sup>

**R.M.S. deviation from mean**      0.056 eÅ<sup>-3</sup>

**Table S4c. Atomic coordinates and equivalent isotropic atomic displacement parameters (Å<sup>2</sup>) for 9i.**

U(eq) is defined as one third of the trace of the orthogonalized U<sub>ij</sub> tensor.

|    | x/a         | y/b         | z/c         | U(eq)      |
|----|-------------|-------------|-------------|------------|
| O1 | 0.57927(19) | 0.48989(16) | 0.33857(16) | 0.0452(4)  |
| O2 | 0.8095(2)   | 0.70515(18) | 0.55453(17) | 0.0535(5)  |
| O3 | 0.4454(2)   | 0.83839(17) | 0.49194(17) | 0.0484(4)  |
| O4 | 0.8637(2)   | 0.4779(2)   | 0.63352(19) | 0.0658(6)  |
| N2 | 0.4003(2)   | 0.63394(19) | 0.16484(19) | 0.0409(4)  |
| N3 | 0.3390(2)   | 0.7719(2)   | 0.1018(2)   | 0.0462(5)  |
| N4 | 0.5922(2)   | 0.9632(2)   | 0.3711(2)   | 0.0449(5)  |
| N5 | 0.7323(3)   | 0.3596(2)   | 0.5109(2)   | 0.0516(5)  |
| C1 | 0.3596(3)   | 0.5391(2)   | 0.1188(2)   | 0.0423(5)  |
| C2 | 0.4309(4)   | 0.4022(3)   | 0.1688(3)   | 0.0676(9)  |
| C3 | 0.3917(4)   | 0.3133(3)   | 0.1185(3)   | 0.0741(9)  |
| C4 | 0.2820(4)   | 0.3596(3)   | 0.0216(3)   | 0.0650(8)  |
| C5 | 0.2106(4)   | 0.4958(4)   | 0.9738(3)   | 0.0778(10) |
| C6 | 0.2473(4)   | 0.5877(3)   | 0.0213(3)   | 0.0676(8)  |
| C7 | 0.4063(3)   | 0.8333(2)   | 0.1596(2)   | 0.0420(5)  |
| C8 | 0.5142(2)   | 0.7370(2)   | 0.2599(2)   | 0.0364(5)  |
| C9 | 0.5040(2)   | 0.6156(2)   | 0.2586(2)   | 0.0369(5)  |

|     |           |           |           |            |
|-----|-----------|-----------|-----------|------------|
| C10 | 0.3610(3) | 0.9851(3) | 0.1171(3) | 0.0573(7)  |
| C11 | 0.6257(2) | 0.7464(2) | 0.3514(2) | 0.0357(5)  |
| C12 | 0.6946(2) | 0.6039(2) | 0.4462(2) | 0.0382(5)  |
| C13 | 0.6716(3) | 0.4888(2) | 0.4351(2) | 0.0391(5)  |
| C14 | 0.5426(3) | 0.8518(2) | 0.4157(2) | 0.0393(5)  |
| C15 | 0.7137(3) | 0.9422(2) | 0.2950(2) | 0.0416(5)  |
| C16 | 0.7417(2) | 0.8144(2) | 0.2829(2) | 0.0387(5)  |
| C17 | 0.7964(3) | 0.5859(2) | 0.5523(2) | 0.0447(5)  |
| C18 | 0.9130(4) | 0.6995(4) | 0.6527(3) | 0.0683(8)  |
| C19 | 0.9147(6) | 0.8414(5) | 0.6305(5) | 0.1238(19) |
| C20 | 0.7999(3) | 0.0278(3) | 0.2421(3) | 0.0544(6)  |
| C21 | 0.9206(3) | 0.9808(3) | 0.1763(3) | 0.0603(7)  |
| C22 | 0.9535(3) | 0.8527(3) | 0.1668(3) | 0.0555(7)  |
| C23 | 0.8633(3) | 0.7675(3) | 0.2193(2) | 0.0459(5)  |

**Table S4d. Bond lengths (Å) for 9i**

|        |          |        |          |
|--------|----------|--------|----------|
| O1-C9  | 1.352(3) | O1-C13 | 1.377(3) |
| O2-C17 | 1.340(3) | O2-C18 | 1.437(3) |
| O3-C14 | 1.230(3) | O4-C17 | 1.222(3) |
| N2-C9  | 1.354(3) | N2-N3  | 1.379(3) |
| N2-C1  | 1.423(3) | N3-C7  | 1.329(3) |
| N4-C14 | 1.353(3) | N4-C15 | 1.403(3) |
| N5-C13 | 1.339(3) | C1-C2  | 1.365(4) |
| C1-C6  | 1.371(4) | C2-C3  | 1.389(4) |
| C3-C4  | 1.353(4) | C4-C5  | 1.357(4) |
| C5-C6  | 1.389(4) | C7-C8  | 1.420(3) |
| C7-C10 | 1.488(3) | C8-C9  | 1.351(3) |

|         |          |         |          |
|---------|----------|---------|----------|
| C8-C11  | 1.504(3) | C11-C12 | 1.521(3) |
| C11-C16 | 1.523(3) | C11-C14 | 1.555(3) |
| C12-C13 | 1.367(3) | C12-C17 | 1.448(3) |
| C15-C20 | 1.373(3) | C15-C16 | 1.386(3) |
| C16-C23 | 1.376(3) | C18-C19 | 1.482(5) |
| C20-C21 | 1.387(4) | C21-C22 | 1.374(4) |
| C22-C23 | 1.398(4) |         |          |

**Table S4e. Bond angles (°) for 9i**

|             |            |             |            |
|-------------|------------|-------------|------------|
| C9-O1-C13   | 114.72(17) | C17-O2-C18  | 116.9(2)   |
| C9-N2-N3    | 108.77(17) | C9-N2-C1    | 131.5(2)   |
| N3-N2-C1    | 119.48(18) | C7-N3-N2    | 105.80(18) |
| C14-N4-C15  | 111.72(19) | C2-C1-C6    | 119.8(2)   |
| C2-C1-N2    | 121.4(2)   | C6-C1-N2    | 118.7(2)   |
| C1-C2-C3    | 119.8(3)   | C4-C3-C2    | 121.1(3)   |
| C3-C4-C5    | 118.6(3)   | C4-C5-C6    | 121.9(3)   |
| C1-C6-C5    | 118.8(3)   | N3-C7-C8    | 111.4(2)   |
| N3-C7-C10   | 119.5(2)   | C8-C7-C10   | 129.1(2)   |
| C9-C8-C7    | 103.49(19) | C9-C8-C11   | 121.75(19) |
| C7-C8-C11   | 134.73(19) | C8-C9-O1    | 127.7(2)   |
| C8-C9-N2    | 110.54(19) | O1-C9-N2    | 121.69(19) |
| C8-C11-C12  | 107.57(17) | C8-C11-C16  | 111.79(18) |
| C12-C11-C16 | 114.69(18) | C8-C11-C14  | 109.50(17) |
| C12-C11-C14 | 112.85(18) | C16-C11-C14 | 100.35(17) |
| C13-C12-C17 | 117.0(2)   | C13-C12-C11 | 123.96(19) |
| C17-C12-C11 | 119.01(19) | N5-C13-C12  | 127.8(2)   |
| N5-C13-O1   | 108.69(19) | C12-C13-O1  | 123.5(2)   |
| O3-C14-N4   | 125.4(2)   | O3-C14-C11  | 126.1(2)   |
| N4-C14-C11  | 108.45(19) | C20-C15-C16 | 122.6(2)   |
| C20-C15-N4  | 128.0(2)   | C16-C15-N4  | 109.33(19) |

|             |            |             |          |
|-------------|------------|-------------|----------|
| C23-C16-C15 | 119.7(2)   | C23-C16-C11 | 130.8(2) |
| C15-C16-C11 | 109.49(19) | O4-C17-O2   | 121.6(2) |
| O4-C17-C12  | 126.5(2)   | O2-C17-C12  | 111.9(2) |
| O2-C18-C19  | 106.7(3)   | C15-C20-C21 | 117.3(3) |
| C22-C21-C20 | 121.0(3)   | C21-C22-C23 | 121.1(3) |
| C16-C23-C22 | 118.3(2)   |             |          |

**Table S4f. Anisotropic atomic displacement parameters ( $\text{\AA}^2$ ) for 9i**

The anisotropic atomic displacement factor exponent takes the form:  $-2\pi^2 [h^2 a^{*2} U_{11} + \dots + 2 h k a^* b^* U_{12}]$

|    | $U_{11}$   | $U_{22}$   | $U_{33}$   | $U_{23}$    | $U_{13}$    | $U_{12}$    |
|----|------------|------------|------------|-------------|-------------|-------------|
| O1 | 0.0525(10) | 0.0350(8)  | 0.0484(9)  | -0.0132(7)  | -0.0066(7)  | -0.0136(7)  |
| O2 | 0.0571(11) | 0.0557(11) | 0.0531(10) | -0.0208(8)  | -0.0117(8)  | -0.0209(9)  |
| O3 | 0.0505(10) | 0.0482(10) | 0.0568(10) | -0.0263(8)  | 0.0151(8)   | -0.0209(8)  |
| O4 | 0.0699(13) | 0.0537(11) | 0.0611(12) | -0.0079(9)  | -0.0236(10) | -0.0102(10) |
| N2 | 0.0395(10) | 0.0371(10) | 0.0488(11) | -0.0163(8)  | -0.0034(8)  | -0.0125(8)  |
| N3 | 0.0423(10) | 0.0393(10) | 0.0559(12) | -0.0160(9)  | -0.0079(9)  | -0.0097(8)  |
| N4 | 0.0489(11) | 0.0374(10) | 0.0572(12) | -0.0232(9)  | 0.0104(9)   | -0.0178(9)  |
| N5 | 0.0572(13) | 0.0357(10) | 0.0548(13) | -0.0076(9)  | -0.0068(10) | -0.0108(9)  |
| C1 | 0.0445(12) | 0.0454(12) | 0.0474(13) | -0.0230(10) | 0.0048(10)  | -0.0204(10) |
| C2 | 0.0722(19) | 0.0474(15) | 0.087(2)   | -0.0278(15) | -0.0261(16) | -0.0153(14) |
| C3 | 0.089(2)   | 0.0490(16) | 0.091(2)   | -0.0307(16) | -0.0192(19) | -0.0204(15) |
| C4 | 0.080(2)   | 0.0639(18) | 0.0682(18) | -0.0333(15) | -0.0050(15) | -0.0329(16) |
| C5 | 0.087(2)   | 0.077(2)   | 0.077(2)   | -0.0304(17) | -0.0293(18) | -0.0279(18) |
| C6 | 0.075(2)   | 0.0570(17) | 0.0730(19) | -0.0263(15) | -0.0230(16) | -0.0163(14) |

|     |            |            |            |             |             |             |
|-----|------------|------------|------------|-------------|-------------|-------------|
| C7  | 0.0406(12) | 0.0387(11) | 0.0469(13) | -0.0158(10) | -0.0005(10) | -0.0102(9)  |
| C8  | 0.0356(10) | 0.0356(11) | 0.0421(11) | -0.0167(9)  | 0.0028(9)   | -0.0122(8)  |
| C9  | 0.0353(10) | 0.0352(11) | 0.0417(11) | -0.0144(9)  | 0.0015(9)   | -0.0107(8)  |
| C10 | 0.0582(16) | 0.0392(13) | 0.0706(18) | -0.0166(12) | -0.0124(13) | -0.0092(11) |
| C11 | 0.0344(10) | 0.0347(10) | 0.0418(11) | -0.0170(9)  | 0.0001(9)   | -0.0110(8)  |
| C12 | 0.0383(11) | 0.0366(11) | 0.0404(12) | -0.0142(9)  | 0.0002(9)   | -0.0102(9)  |
| C13 | 0.0395(11) | 0.0376(11) | 0.0402(11) | -0.0137(9)  | 0.0036(9)   | -0.0107(9)  |
| C14 | 0.0386(11) | 0.0387(11) | 0.0441(12) | -0.0170(9)  | 0.0014(9)   | -0.0127(9)  |
| C15 | 0.0411(12) | 0.0427(12) | 0.0449(12) | -0.0146(10) | 0.0024(10)  | -0.0185(10) |
| C16 | 0.0351(11) | 0.0424(12) | 0.0405(11) | -0.0146(9)  | -0.0008(9)  | -0.0130(9)  |
| C17 | 0.0435(12) | 0.0439(13) | 0.0467(13) | -0.0149(10) | -0.0017(10) | -0.0129(10) |
| C18 | 0.0572(17) | 0.095(2)   | 0.0646(18) | -0.0369(17) | -0.0103(14) | -0.0275(16) |
| C19 | 0.120(4)   | 0.116(4)   | 0.167(5)   | -0.078(3)   | -0.042(3)   | -0.044(3)   |
| C20 | 0.0571(15) | 0.0532(15) | 0.0611(16) | -0.0173(12) | 0.0056(13)  | -0.0309(13) |
| C21 | 0.0534(15) | 0.0737(19) | 0.0624(17) | -0.0194(14) | 0.0093(13)  | -0.0358(14) |
| C22 | 0.0390(13) | 0.0734(18) | 0.0540(15) | -0.0191(13) | 0.0057(11)  | -0.0192(12) |
| C23 | 0.0383(12) | 0.0501(13) | 0.0467(13) | -0.0167(11) | -0.0013(10) | -0.0084(10) |

**Table S4g. Hydrogen atomic coordinates and isotropic atomic displacement parameters ( $\text{\AA}^2$ ) for 9i**

|      | x/a    | y/b    | z/c     | U(eq)    |
|------|--------|--------|---------|----------|
| H4   | 0.5540 | 1.0376 | 0.3874  | 0.054000 |
| H5A  | 0.7939 | 0.3417 | 0.5756  | 0.062000 |
| H5B  | 0.7098 | 0.2945 | 0.4948  | 0.062000 |
| H2   | 0.5054 | 0.3686 | 0.2362  | 0.081000 |
| H3   | 0.4417 | 0.2203 | 0.1520  | 0.089000 |
| H4A  | 0.2561 | 0.2995 | -0.0114 | 0.078000 |
| H5   | 0.1350 | 0.5284 | -0.0928 | 0.093000 |
| H6   | 0.1967 | 0.6806 | -0.0124 | 0.081000 |
| H10A | 0.4505 | 1.0151 | 0.1029  | 0.086000 |
| H10B | 0.3073 | 1.0162 | 0.1812  | 0.086000 |
| H10C | 0.2960 | 1.0218 | 0.0396  | 0.086000 |
| H18A | 1.0144 | 0.6422 | 0.6488  | 0.082000 |

|      | <b>x/a</b> | <b>y/b</b> | <b>z/c</b> | <b>U(eq)</b> |
|------|------------|------------|------------|--------------|
| H18B | 0.8788     | 0.6623     | 0.7356     | 0.082000     |
| H19A | 0.9833     | 0.8423     | 0.6941     | 0.186000     |
| H19B | 0.8139     | 0.8969     | 0.6350     | 0.186000     |
| H19C | 0.9482     | 0.8771     | 0.5480     | 0.186000     |
| H20  | 0.7783     | 1.1138     | 0.2501     | 0.065000     |
| H21  | 0.9802     | 1.0369     | 0.1380     | 0.072000     |
| H22  | 1.0372     | 0.8221     | 0.1248     | 0.067000     |
| H23  | 0.8848     | 0.6814     | 0.2115     | 0.055000     |

## Green Chemistry Metrics:

### Green Chemistry Metrics for 8a (symmetric derivative)

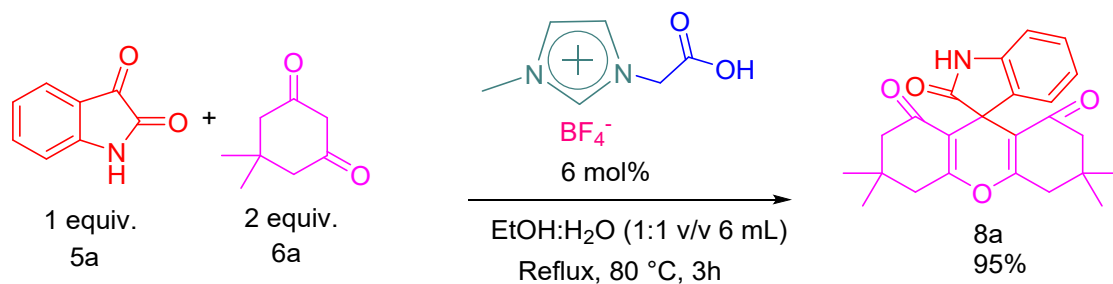

Mass: 0.2g

0.381g

0.505g

Moles: 1.36 mmol

2.72 mmol

1.36 mmol

GMW: 147.13

140.18

391.1784

1. Percentage Yield (%) =  $(0.505 \div 0.532) \times 100 = 95\%$

2. Atom Economy =  $(391.18 \div 427.49) \times 100 = 91.5\%$

3. Atom Efficiency (%) =  $0.95 \times 91.5 = 86.9\%$

4. Carbon Economy =  $(24 \div 24) \times 100 = 100\%$

5. Reaction Mass Efficiency (%) =  $(0.505 \div 0.581) \times 100 = 86.92\%$

6. E-Factor =  $(0.076 \div 0.505) = 0.15$

7. TON (Turn over number) = 15.86

8. TOF (Turn over frequency) =  $5.287 \text{ h}^{-1}$

### Green Chemistry Metrics for 9a (unsymmetric derivative)

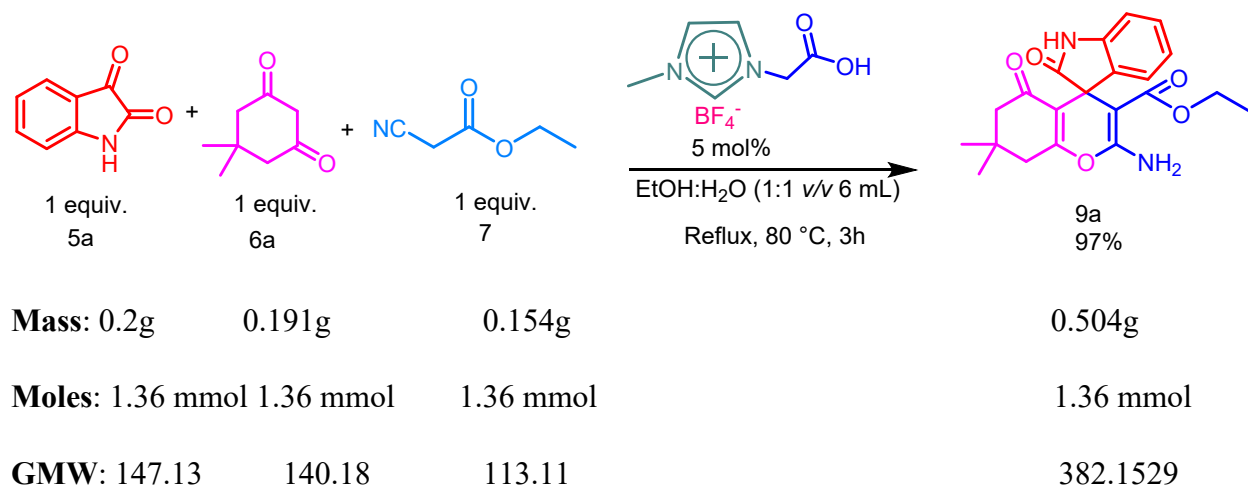

1. **Percentage Yield (%)** =  $(0.504 \div 0.52) \times 100 = 97\%$

2. **Atom Economy** =  $(382.15 \div 400.42) \times 100 = 95\%$

3. **Atom Efficiency (%)** =  $0.97 \times 95 = 92.15\%$

4. **Carbon Economy** =  $(21 \div 21) \times 100 = 100\%$

5. **Reaction Mass Efficiency (%)** =  $(0.504 \div 0.545) \times 100 = 92.5 \%$

6. **E-Factor** =  $(0.041 \div 0.504) = 0.08$

7. **TON (Turn over number)** = 19.40

8. **TOF (Turn over frequency)** =  $6.47 \text{ h}^{-1}$

## Summarized Green Chemistry Metrics for 8a and 9a

| Name of Compounds | Percentage Yield (%) | Atom Economy | Atom Efficiency (%) | Carbon Economy | Reaction mass efficiency (%) | E-factor | TON   | TOF                   |
|-------------------|----------------------|--------------|---------------------|----------------|------------------------------|----------|-------|-----------------------|
| <b>8a</b>         | 95%                  | 91.5%        | 86.9%               | 100%           | 86.92 %                      | 0.15     | 15.86 | 5.287 h <sup>-1</sup> |
| <b>9a</b>         | 97%                  | 95%          | 92.15%              | 100%           | 92.5 %                       | 0.08     | 19.40 | 6.47 h <sup>-1</sup>  |
